# Supplementary material for: Regulation of circular dichroism behavior and construction of tunable solid-state circularly polarized luminescence based on BINOL derivatives
Source: Royal Society of Chemistry journal article supplement (doi:10.1039/c9qm00292h), 2019-01-01
Supplement: c9qm00292h1.pdf [file c9qm00292h1.pdf]

## Supporting Information

### **Regulation of circular dichroism behavior and construction of tunable solid-state circularly polarized luminescence based on BINOL derivatives**

Na Zhao,<sup>\*,†</sup> Wangwang Gao,<sup>†</sup> Min Zhang,<sup>†</sup> Junfang Yang,<sup>§</sup> Xiaoyan Zheng,<sup>§\*</sup> Yue Li,<sup>†</sup> Rongrong Cui,<sup>†</sup> Wei Yin,<sup>†</sup> and Nan Li<sup>\*,†</sup>

<sup>†</sup>Key Laboratory of Macromolecular Science of Shaanxi Province, Key Laboratory of Applied Surface and Colloid Chemistry of Ministry of Education, Key Laboratory of the Ministry of Education for Medicinal Resources and Natural Pharmaceutical Chemistry, School of Chemistry & Chemical Engineering, Shaanxi Normal University, 710119 Xi'an, P. R. China. E-mail: nzhao@snnu.edu.cn; nli@snnu.edu.cn.

<sup>§</sup>Beijing Key Laboratory of Photoelectronic/Electrophotonic Conversion Materials, Key Laboratory of Cluster Science of Ministry of Education, School of Chemistry and Chemical Engineering, Beijing Institute of Technology, 100081 Beijing, P. R. China. E-mail: xiaoyanzheng@bit.edu.cn.

## Table of Contents

|                                                           |    |
|-----------------------------------------------------------|----|
| 1. General Information.....                               | 3  |
| 2. Target Compounds Chart.....                            | 4  |
| 3. Experimental Procedure and Characterization data.....  | 6  |
| 4. UV-vis Spectra of Target Compounds.....                | 20 |
| 5. Photoluminescence Properties.....                      | 21 |
| 6. X-ray Single Crystals Data and their Packing Mode..... | 31 |
| 7. Molecular dynamics simulations.....                    | 36 |
| 8. NMR Spectroscopy.....                                  | 38 |

## 1. General Information

Tetrahydrofuran (THF) was distilled over sodium and benzophenone. DMF was distilled over  $\text{CaH}_2$ . Petroleum ether and ethyl acetate for chromatography were distilled before used. All other reagents and solvents were used directly from the corresponding supplier without further purification. All starting materials were purchased from Alfa Aesar, Aladdin, Energy, Accela and use directly. Analytical thin-layer chromatography (TLC) was carried out using commercial silica gel plated (GF254). Nuclear magnetic resonance spectra ( $^1\text{H}$ ,  $^{13}\text{C}$  NMR) were recorded on a Bruker AV 300 ( $^1\text{H}$  at 300 MHz,  $^{13}\text{C}$  at 75 MHz), a Bruker Ascend 400 ( $^1\text{H}$  at 400 MHz,  $^{13}\text{C}$  at 101 MHz) or a Bruker Ascend 600 ( $^1\text{H}$  at 600 MHz,  $^{13}\text{C}$  at 151 MHz). The chemical shifts are reported as ppm and solvent residual peaks were shown as following:  $\text{CDCl}_3$   $\delta$  H (7.26 ppm) and  $\delta$  C (77.16 ppm);  $d_6$ -DMSO  $\delta$  H (2.50 ppm) and  $\delta$  C (39.52 ppm). UV-visible absorption spectra were measured on Purkinje TU-1950 spectrometer. Fluorescence spectra were recorded on a Hitachi F-7000 spectrometer. Circular dichroisms (CD) were recorded on a Chirascan spectrometer. Circularly polarized luminescences (CPL) were recorded on a JASCO CPL-300 spectrometer. Fluorescence quantum yields were measured using Hamamatsu C9920-02G. Single crystal was collected on Oxford diffraction Eos CCD detector or Bruker CMOS PHOTON 100 detector, respectively. The single crystal pictures were taken on Olympus DP80 fluorescent microscopy. Dynamic Light Scattering (DLS) was carried out on Malvern Zetasizer Nano ZS90. High-resolution Mass spectra (HRMS) were obtained on a Bruker Maxis and Microflex and reported as m/z (relative intensity). Accurate masses are presented as molecular ion  $[\text{M}+\text{Na}]^+$  or  $[\text{M}+\text{H}]^+$ , respectively.

## 2. Target Compounds Charts

|                                                                                     |                                                                                     |                                                                                       |
|-------------------------------------------------------------------------------------|-------------------------------------------------------------------------------------|---------------------------------------------------------------------------------------|
| 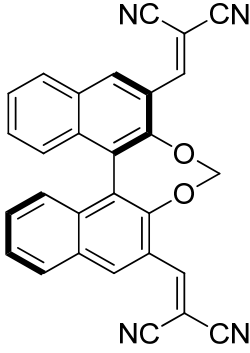   |    |    |
| <b>BINB-1</b><br><a href="#">Data</a> <a href="#">NMR</a> <a href="#">X-ray</a>     | <b>BINB-2</b><br><a href="#">Data</a> <a href="#">NMR</a> <a href="#">X-ray</a>     | <b>BINB-3</b><br><a href="#">Data</a> <a href="#">NMR</a>                             |
|   |   |   |
| <b>BINB-4</b><br><a href="#">Data</a> <a href="#">NMR</a> <a href="#">X-ray</a>     | <b>BINB-5</b><br><a href="#">Data</a> <a href="#">NMR</a> <a href="#">X-ray</a>     | <b>BINB-6</b><br><a href="#">Data</a> <a href="#">NMR</a>                             |
|  |  |  |
| <b>BINB-7</b><br><a href="#">Data</a> <a href="#">NMR</a> <a href="#">X-ray</a>     | <b>BINB-8</b><br><a href="#">Data</a> <a href="#">NMR</a> <a href="#">X-ray</a>     | <b>BINB-6A</b><br><a href="#">Data</a> <a href="#">NMR</a> <a href="#">X-ray</a>      |
|  |  |  |
| <b>BINB-6B</b><br><a href="#">Data</a> <a href="#">NMR</a>                          | <b>BINB-6C</b><br><a href="#">Data</a> <a href="#">NMR</a>                          | <b>BINB-6D</b><br><a href="#">Data</a> <a href="#">NMR</a>                            |

|                                                                                                       |                                                                                                       |                                                                                                       |
|-------------------------------------------------------------------------------------------------------|-------------------------------------------------------------------------------------------------------|-------------------------------------------------------------------------------------------------------|
| 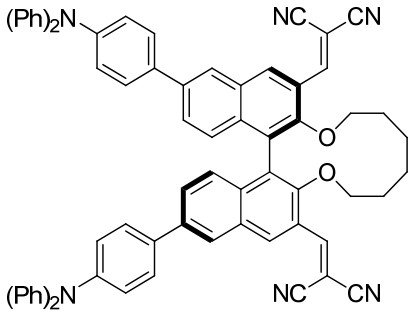                     |                      |                    |
| <p align="center"><b>BINB-6E</b></p> <p align="center"><a href="#">Data</a>   <a href="#">NMR</a></p> | <p align="center"><b>BINUB-1</b></p> <p align="center"><a href="#">Data</a>   <a href="#">NMR</a></p> | <p align="center"><b>BINUB-2</b></p> <p align="center"><a href="#">Data</a>   <a href="#">NMR</a></p> |
|                      |                                                                                                       |                                                                                                       |
| <p align="center"><b>BINUB-3</b></p> <p align="center"><a href="#">Data</a>   <a href="#">NMR</a></p> |                                                                                                       |                                                                                                       |

### 3. Experimental Procedure and Characterization Data

#### 3.1 Reaction procedures

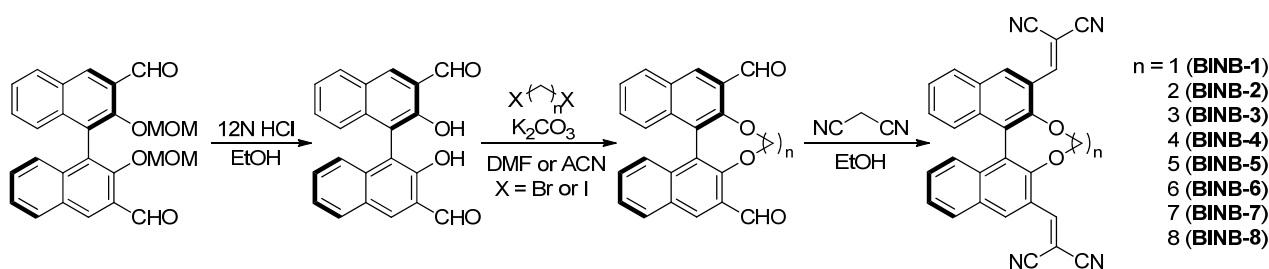

Scheme S1. Synthetic route of **BINB** derivatives.

**Remove –MOM group:** (*R*)-2,2'-bis(methoxymethoxy)-[1,1'-binaphthalene]-3,3'-dicarbaldehyde (860 mg, 2.0 mmol) was dissolved in THF (12.00 mL). The temperature of the reaction mixture was reduced to 0 °C, and then 12 N HCl (6.00 mL) was added over 5 min with stirring. Then the reaction mixture was allowed to stir at room temperature for approximately 3 hours. After completion of the reaction, filter afforded desired product in 84% yield.

**Introduction of alkyl chain group:** To a stirred solution containing corresponding dialdehyde (1.00 equiv) and K<sub>2</sub>CO<sub>3</sub> (6.00 equiv for diiodomethane, 10.00 equiv for other di-bromo or di-iodo alkanes) in DMF were added corresponding di-bromo alkanes or di-iodo alkanes (1.00 to 3.00 equiv) slowly. Then the reaction was stirred at room temperature for 12 hours (for diiodomethane, the reaction need reflux for 12 hours). After the reaction was completed based on TLC, the solvent was removed under reduced pressure and purified by column chromatography on silica gel (Petroleum ether / EtOAc) to give desired product.

**Introduction of malononitrile:** To a stirred solution of corresponding di-aldehyde (1.00 equiv) in ethanol were added malononitrile (3.00 equiv) and NaOH (0.05 equiv, 0.1 M in ethanol). Then the reaction kept stirring at room temperature for certain hours. After the reaction was completed based on TLC, the product was purified by column chromatography on silica gel to give desired product.

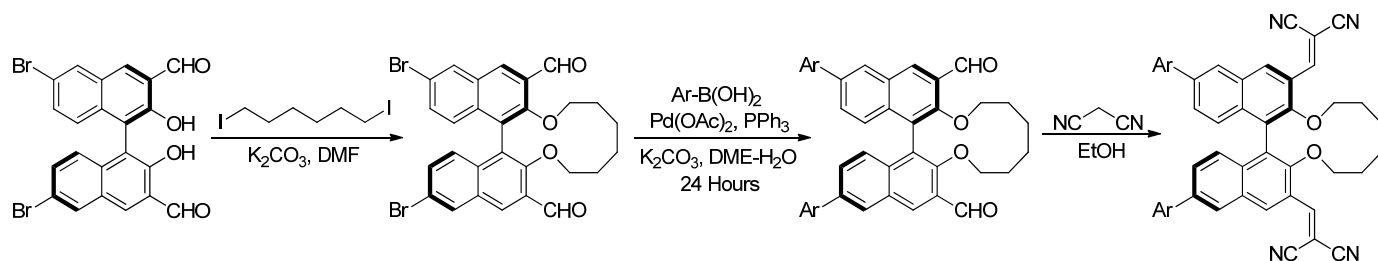

Scheme S2. Synthetic route of **BINB-6** derivatives.

**Introduction of alkyl chain group:** To a stirred solution containing corresponding di-aldehyde (100.00 mg, 0.20 mmol) and  $K_2CO_3$  (138.00 mg, 1.00 mmol) in DMF (10.00 mL) were added 1,6-diiodo hexane (33.00  $\mu$ L, 0.20 mmol) slowly. Then the reaction was stirred at 80 °C for 24 hours. After the reaction was completed based on TLC, the mixture was diluted with water, followed by extraction with EtOAc. The organic phase were combined and dried over  $Na_2SO_4$ . The solvent was removed under reduced pressure and the residue was purified by column chromatography on silica gel (Petroleum ether / EtOAc) to give desired product.

**Introduction of varied electron donating group:** Di-aldehyde (0.10 mmol), corresponding boronic acid (0.30 mmol),  $K_2CO_3$  (83.00 mg, 0.60 mmol),  $Pd(OAc)_2$  (5.00 mg, 0.02 mmol) and  $PPh_3$  (6.00 mg, 0.02 mmol) were dissolved in 1.00 mL DME- $H_2O$  ( $v / v = 1:1$ ). The mixture was stirred at room temperature under  $N_2$  for 24 hours. Then the reaction was diluted with water, followed by extraction with  $CH_2Cl_2$ . The organic phase were combined and dried over  $Na_2SO_4$ . The solvent was removed under reduced pressure and the residue was purified by column chromatography on silica gel (Petroleum ether / EtOAc) to give desired product.

**Introduction of malononitrile:** To a stirred solution of corresponding di-aldehyde (1.00 equiv) in ethanol were added malononitrile (3.00 equiv) and NaOH (0.20 equiv, 0.1 M in ethanol). Then the reaction kept stirring at room temperature for certain hours. After the reaction was completed based on TLC, the product was purified by column chromatography on silica gel to give desired product.

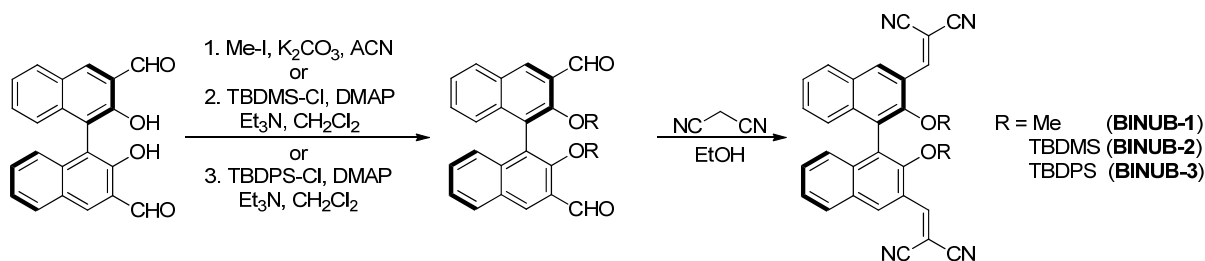

Scheme S3. Synthetic route of **BINUB** derivatives.

**Introduction of -Me group:** Potassium carbonate (110.40 mg, 0.8 mmol) was added to a stirred solution of corresponding dialdehyde (68.40 mg, 0.2 mmol) in acetonitrile (5.00 mL) at room temperature. Then, methyl iodide (74  $\mu$ L, 1.2 mmol) was added to the reaction mixture and kept the reaction stirred at room temperature overnight. After the reaction was completed based on TLC, the solvent was removed under reduced pressure and purified by column chromatography on silica gel (Petroleum ether/EtOAc) to give desired product in 82% yield.

**Introduction of -TBDMS group:** Corresponding dialdehyde (0.35 mmol) was added to a stirred solution of *tert*-butylchlorodimethylsilane (150.72 mg, 3.5 mmol), DMAP (17.25 mg, 0.14 mmol) and NEt<sub>3</sub> (489.00  $\mu$ L, 3.5 mmol) in DMF (2.00 mL) at room temperature under N<sub>2</sub>. Then the reaction stirred at room temperature for 4 hours. After the reaction was completed based on TLC, the solvent was removed under reduced pressure and purified by column chromatography on silica gel (Petroleum ether/EtOAc) to give desired product in 74% yield.

**Introduction of -TBDPS group:** Corresponding dialdehyde (0.2 mmol) was added to a stirred solution of *tert*-butylchlorodiphenylsilane (275.00 mg, 1.0 mmol), DMAP (13.00 mg, 0.1 mmol) and NEt<sub>3</sub> (95.00  $\mu$ L, 0.7 mmol) in CH<sub>2</sub>Cl<sub>2</sub> (1.00 mL) at room temperature under N<sub>2</sub>. Then the reaction stirred at room temperature for 15 hours. After the reaction was completed based on TLC, the solvent was removed under reduced pressure and purified by column chromatography on silica gel (Petroleum ether/EtOAc) to give desired product in 81%



yield.

**Introduction of malononitrile:** To a stirred solution of corresponding di-aldehyde (1.00 equiv) in ethanol were added malononitrile and base (NaOH or piperidine). The reaction kept stirring at room temperature for certain hours. After the reaction was completed based on TLC, the product was purified by column chromatography on silica gel to give desired product.

### 3.2 Compound data

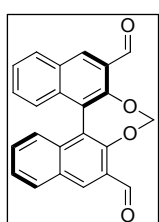

**(R)-dinaphtho[2,1-*d*:1',2'-*f*][1,3]dioxepine-2,6-dicarbaldehyde.** 68% yield.

$^1\text{H-NMR}$  (600 MHz,  $\text{CDCl}_3$ )  $\delta$  (ppm): 10.60 (s, 2H, CHO), 8.61 (s, 2H, Ar H), 8.09 (d, 2H,  $J = 8.3$  Hz, Ar H), 7.55-7.51 (m, 2H, Ar H), 7.42 (t, 4H,  $J = 3.7$  Hz, Ar H), 5.90 (s, 2H,  $\text{CH}_2$ );  $^{13}\text{C-NMR}$  (101 MHz,  $\text{CDCl}_3$ )  $\delta$  (ppm): 189.49, 151.15, 134.94,

132.29, 130.89, 130.80, 129.28, 127.44, 126.85, 126.73, 126.48, 104.12.

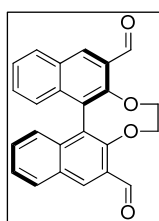

**(R)-4,5-dihydrodinaphtho[2,1-*e*:1',2'-*g*][1,4]dioxocine-2,7-dicarbaldehyde.**

38% yield.  $^1\text{H-NMR}$  (600 MHz,  $\text{CDCl}_3$ )  $\delta$  (ppm): 10.54 (s, 2H, CHO), 8.60 (s, 2H, Ar H), 8.06 (d, 2H,  $J = 8.2$  Hz, Ar H), 7.47 (t, 2H,  $J = 7.3$  Hz, Ar H), 7.34 (t,

2H,  $J = 8.0$  Hz, Ar H), 7.13 (d, 2H,  $J = 8.6$  Hz, Ar H), 4.61-4.56 (m, 2H,  $\text{CH}_2$ ), 4.23-4.18 (m, 2H,  $\text{CH}_2$ );  $^{13}\text{C-NMR}$  (151 MHz,  $\text{CDCl}_3$ )  $\delta$  (ppm): 190.17, 156.19, 135.97, 134.07, 130.44, 130.25, 129.58, 127.92, 126.89, 126.20, 125.23, 74.04.

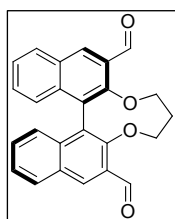

**(R)-5,6-dihydro-4H-dinaphtho[2,1-*f*:1',2'-*h*][1,5]dioxonine-2,8-dicarbaldehyde.**

49% yield.  $^1\text{H-NMR}$  (600 MHz,  $\text{CDCl}_3$ )  $\delta$  (ppm): 10.44 (s, 2H, CHO), 8.57 (s, 2H, Ar H), 8.06 (d, 2H,  $J = 8.2$  Hz, Ar H), 7.47 (t, 2H,  $J = 7.4$  Hz, Ar H),

7.36 (t, 2H,  $J = 8.0$  Hz, Ar H), 7.05 (d, 2H,  $J = 8.5$  Hz, Ar H), 4.49-4.45 (m, 2H,  $\text{CH}_2$ ), 4.31-4.27 (m, 2H,  $\text{CH}_2$ ), 1.92-1.88 (m, 2H,  $\text{CH}_2$ );  $^{13}\text{C-NMR}$  (151 MHz,  $\text{CDCl}_3$ )  $\delta$  (ppm): 190.06, 153.71, 136.60, 134.66, 130.29, 130.04, 129.87, 128.46, 126.60, 126.09, 125.91,

76.34, 31.28.

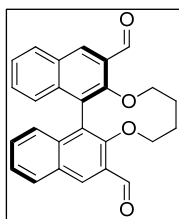

**(R)-4,5,6,7-tetrahydrodinaphtho[2,1-*b*:1',2'-*d*][1,6]dioxecine-2,9-dicarbaldehyde.** 51% yield.  $^1\text{H-NMR}$  (600 MHz,  $\text{CDCl}_3$ )  $\delta$  (ppm): 10.52 (s, 2H, CHO),

8.60 (s, 2H, Ar H), 8.04 (d, 2H,  $J = 8.2$  Hz, Ar H), 7.46 (t, 2H,  $J = 7.3$  Hz, Ar

H), 7.37 (t, 2H,  $J = 7.6$  Hz, Ar H), 7.04 (d, 2H,  $J = 8.5$  Hz, Ar H), 4.20-4.14 (m, 4H,  $\text{CH}_2$ ),

1.76-1.70 (m, 2H,  $\text{CH}_2$ ), 1.53-1.49 (m, 2H,  $\text{CH}_2$ );  $^{13}\text{C-NMR}$  (101 MHz,  $\text{CDCl}_3$ )  $\delta$  (ppm):

190.05, 153.32, 136.88, 133.92, 130.26, 129.97, 129.92, 128.22, 126.70, 126.15, 125.32,

76.14, 25.62.

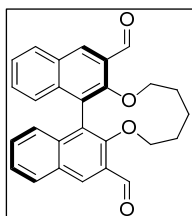

**(R)-9,10,11,12-tetrahydro-8*H*-dinaphtho[2,1-*b*:1',2'-*d*][1,6]dioxacycloundecine-6,14-dicarbaldehyde.** 32% yield.  $^1\text{H-NMR}$  (600 MHz,  $\text{CDCl}_3$ )  $\delta$  (ppm):

10.55 (s, 2H, CHO), 8.58 (s, 2H, Ar H), 8.03 (d, 2H,  $J = 8.1$  Hz, Ar H),

7.48-7.45 (m, 2H, Ar H), 7.43-7.40 (m, 2H, Ar H), 7.20 (t, 2H,  $J = 8.5$  Hz, Ar H), 4.43-4.40

(m, 2H,  $\text{CH}_2$ ), 4.05-4.01 (m, 2H,  $\text{CH}_2$ ), 1.61-1.56 (m, 2H,  $\text{CH}_2$ ), 1.49-1.42 (m, 2H,  $\text{CH}_2$ ),

1.20-1.16 (s, 2H,  $\text{CH}_2$ );  $^{13}\text{C-NMR}$  (101 MHz,  $\text{CDCl}_3$ )  $\delta$  (ppm): 190.44, 155.13, 136.75,

133.94, 130.20, 129.92, 129.63, 128.36, 125.93, 125.51, 125.13, 74.95, 28.12, 21.19.

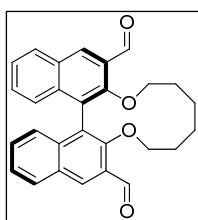

**(R)-2,3,4,5,6,7-hexahydrodinaphtho[2,1-*b*:1',2'-*d*][1,6]dioxacyclododecine-9,20-dicarbaldehyde.** 17% yield.  $^1\text{H-NMR}$  (600 MHz,  $\text{CDCl}_3$ )  $\delta$  (ppm): 10.56

(s, 2H, CHO), 8.61 (s, 2H, Ar H), 8.05 (d, 2H,  $J = 8.2$  Hz, Ar H), 7.46 (t, 2H,  $J$

= 7.3 Hz, Ar H), 7.36 (t, 2H,  $J = 7.7$  Hz, Ar H), 7.12 (d, 2H,  $J = 8.5$  Hz, Ar H), 3.84-3.80 (m,

2H,  $\text{CH}_2$ ), 3.53-3.49 (m, 2H,  $\text{CH}_2$ ), 1.24-1.22 (m, 2H,  $\text{CH}_2$ ), 1.04-0.99 (m, 2H,  $\text{CH}_2$ ),

0.86-0.83 (s, 4H,  $\text{CH}_2$ );  $^{13}\text{C-NMR}$  (151 MHz,  $\text{CDCl}_3$ )  $\delta$  (ppm): 190.65, 156.02, 137.20,

132.11, 130.51, 129.94, 129.54, 129.12, 126.00, 125.79, 125.62, 76.08, 29.45, 25.73.

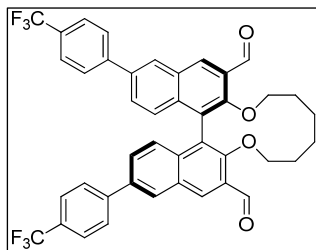

**(R)-12,17-bis(4-(trifluoromethyl)phenyl)-2,3,4,5,6,7-hexahydrodinaphtho[2,1-*b*:1',2'-*d*][1,6]dioxacyclododecine-9,20-dicarbaldehyde.**

47% yield.  $^1\text{H-NMR}$  (600 MHz,  $\text{CDCl}_3$ )  $\delta$  (ppm): 10.66 (s, 2H, CHO), 8.68 (s, 2H, Ar H), 8.25 (s, 2H, Ar H), 7.79-7.73 (m, 8H, Ar H),

7.71-7.69 (m, 2H, Ar H), 7.47 (d, 2H,  $J = 8.9$  Hz, Ar H), 4.33-4.29 (m, 2H,  $\text{CH}_2$ ), 3.89-3.84 (m, 2H,  $\text{CH}_2$ ), 1.75-1.73 (m, 2H,  $\text{CH}_2$ ), 1.54 (s, 2H,  $\text{CH}_2$ ), 1.27-1.25 (m, 2H,  $\text{CH}_2$ ), 1.12-1.09 (m, 2H,  $\text{CH}_2$ );  $^{13}\text{C-NMR}$  (151 MHz,  $\text{CDCl}_3$ )  $\delta$  (ppm): 190.58, 154.94, 143.68, 137.22, 135.59, 133.30, 130.06, 129.85, 129.82, 129.48, 129.13, 128.46, 127.62, 126.65, 126.12, 126.09, 125.25, 123.44, 123.29, 72.94, 28.44, 22.75.

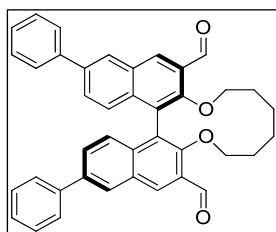

**(R)-12,17-diphenyl-2,3,4,5,6,7-hexahydrodinaphtho[2,1-*b*:1',2'-*d*][1,6]dioxacyclododecine-9,20-dicarbaldehyde.** 86% yield.  $^1\text{H-NMR}$  (400

MHz,  $\text{CDCl}_3$ )  $\delta$  (ppm): 10.67 (s, 2H, CHO), 8.65 (s, 2H, Ar H), 8.23 (d, 2H,  $J = 1.6$  Hz, Ar H), 7.73-7.71 (m, 2H, Ar H), 7.70-7.68 (m, 4H, Ar H),

7.50-7.43 (m, 6H, Ar H), 7.41-7.37 (m, 2H, Ar H), 4.31-4.24 (m, 2H,  $\text{CH}_2$ ), 3.86-3.79 (m, 2H,  $\text{CH}_2$ ), 1.78-1.72 (m, 2H,  $\text{CH}_2$ ), 1.31-1.27 (m, 4H,  $\text{CH}_2$ ), 1.14-1.07 (m, 2H,  $\text{CH}_2$ );  $^{13}\text{C-NMR}$  (101 MHz,  $\text{CDCl}_3$ )  $\delta$  (ppm): 190.88, 154.47, 153.56, 140.22, 138.76, 135.26, 132.90, 129.99, 129.56, 129.33, 129.16, 127.91, 127.89, 127.37, 126.37, 123.35, 72.50, 28.47, 22.80.

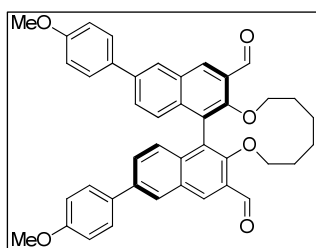

**(R)-12,17-bis(4-methoxyphenyl)-2,3,4,5,6,7-hexahydrodinaphtho[2,1-*b*:1',2'-*d*][1,6]dioxacyclododecine-9,20-dicarbaldehyde.** 65%

yield.  $^1\text{H-NMR}$  (600 MHz,  $\text{CDCl}_3$ )  $\delta$  (ppm): 10.66 (s, 2H, CHO), 8.62 (s, 2H, Ar H), 8.16 (d, 2H,  $J = 1.3$  Hz, Ar H), 7.69-7.67 (m, 2H, Ar H),

7.62 (d, 4H,  $J = 8.7$  Hz, Ar H), 7.42 (d, 2H,  $J = 8.9$  Hz, Ar H), 7.02 (d, 4H,  $J = 8.7$  Hz, Ar H), 4.27-4.23 (m, 2H,  $\text{CH}_2$ ), 3.87 (s, 6H,  $\text{CH}_3$ ), 3.83-3.79 (m, 2H,  $\text{CH}_2$ ), 1.75-1.72 (m, 2H,  $\text{CH}_2$ ), 1.54-1.48 (m, 2H,  $\text{CH}_2$ ), 1.30-1.25 (m, 2H,  $\text{CH}_2$ ), 1.11-1.07 (m, 2H,  $\text{CH}_2$ );  $^{13}\text{C-NMR}$  (151

MHz, CDCl<sub>3</sub>)  $\delta$  (ppm): 190.95, 159.70, 154.21, 138.36, 134.93, 132.68, 132.64, 130.08, 129.38, 129.30, 128.40, 127.08, 126.31, 123.39, 114.64, 72.38, 55.54, 28.46, 22.81.

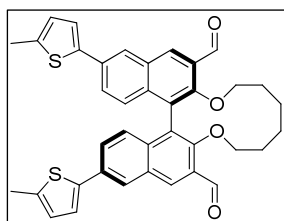

**(R)-12,17-bis(5-methylthiophen-2-yl)-2,3,4,5,6,7-hexahydrodinaphtho[2,1-*b*:1',2'-*d*][1,6]dioxacyclododecine-9,20-dicarbaldehyde.** 68% yield. <sup>1</sup>H-NMR (600 MHz, CDCl<sub>3</sub>)  $\delta$  (ppm): 10.62 (s, 2H, CHO), 8.56 (s,

2H, Ar H), 8.12 (d, 2H, *J* = 1.2 Hz, Ar H), 7.65-7.63 (m, 2H, Ar H), 7.33 (d, 2H, *J* = 8.9 Hz, Ar H), 7.19 (d, 2H, *J* = 3.5 Hz, Ar H), 6.75 (d, 2H, *J* = 2.5 Hz, Ar H), 4.24-4.20 (m, 2H, CH<sub>2</sub>), 3.81-3.76 (m, 2H, CH<sub>2</sub>), 2.52 (s, 6H, CH<sub>3</sub>), 1.72-1.69 (m, 2H, CH<sub>2</sub>), 1.51-1.50 (m, 2H, CH<sub>2</sub>), 1.07-1.05 (m, 2H, CH<sub>2</sub>), 0.90-0.84 (m, 2H, CH<sub>2</sub>); <sup>13</sup>C-NMR (151 MHz, CDCl<sub>3</sub>)  $\delta$  (ppm): 190.72, 154.24, 140.96, 140.49, 134.94, 132.48, 132.36, 129.92, 129.36, 127.99, 126.61, 126.27, 125.40, 123.83, 123.38, 72.48, 28.39, 22.73, 15.63.

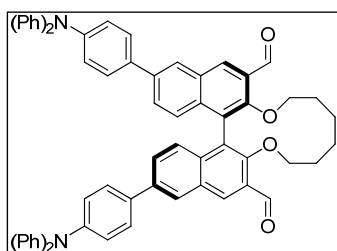

**(R)-12,17-bis(4-(diphenylamino)phenyl)-2,3,4,5,6,7-hexahydrodinaphtho[2,1-*b*:1',2'-*d*][1,6]dioxacyclododecine-9,20-dicarbaldehyde.** 52% yield. <sup>1</sup>H-NMR (400 MHz, CDCl<sub>3</sub>)  $\delta$  (ppm): <sup>1</sup>H-NMR (400 MHz, CDCl<sub>3</sub>)  $\delta$  (ppm): 10.67 (s, 2H, CHO), 8.63 (s, 2H, Ar H), 8.18

(d, 2H, *J* = 1.4 Hz, Ar H), 7.71-7.69 (m, 2H, Ar H), 7.56 (d, 4H, *J* = 8.7 Hz, Ar H), 7.43 (d, 2H, *J* = 8.9 Hz, Ar H), 7.30-7.26 (m, 8H, Ar H), 7.19-7.14 (m, 12H, Ar H), 7.07-7.04 (m, 4H, Ar H), 4.29-4.23 (m, 2H, CH<sub>2</sub>), 3.84-3.78 (m, 2H, CH<sub>2</sub>), 1.76-1.72 (m, 2H, CH<sub>2</sub>), 1.59-1.54 (m, 2H, CH<sub>2</sub>), 1.31-1.25 (m, 2H, CH<sub>2</sub>), 1.11-1.07 (m, 2H, CH<sub>2</sub>); <sup>13</sup>C-NMR (101 MHz, CDCl<sub>3</sub>)  $\delta$  (ppm): 190.91, 154.19, 147.79, 147.66, 138.19, 134.93, 133.67, 132.65, 130.05, 129.48, 129.27, 129.22, 127.94, 127.00, 126.31, 124.81, 123.70, 123.33, 72.32, 28.44, 22.79.

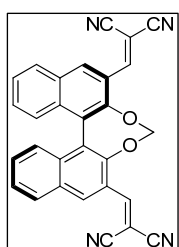

**(R)-2,2'-(dinaphtho[2,1-*d*:1',2'-*f*][1,3]dioxepine-2,6-diylbis(methanylylidene))dimalononitrile (BINB-1).** 72% yield. <sup>1</sup>H-NMR (600 MHz, CDCl<sub>3</sub>)  $\delta$  (ppm):

9.06 (s, 2H), 8.40 (s, 2H, Ar H), 8.11 (d, 2H,  $J = 8.2$  Hz, Ar H), 7.60 (t, 2H,  $J = 7.4$  Hz, Ar H), 7.48 (t, 2H,  $J = 7.9$  Hz, Ar H), 7.37 (d, 2H,  $J = 8.6$  Hz, Ar H), 5.75 (s, 2H, CH<sub>2</sub>); <sup>13</sup>C-NMR (101 MHz, CDCl<sub>3</sub>) δ (ppm): 153.36, 148.58, 134.67, 131.97, 130.93, 130.69, 130.31, 127.25, 126.62, 126.40, 123.12, 113.83, 112.75, 103.68, 84.74. HRMS (ESI-TOF)  $m/z$ : [M+Na]<sup>+</sup> calcd for C<sub>29</sub>H<sub>14</sub>N<sub>4</sub>O<sub>2</sub>Na<sup>+</sup>, 473.1009, found, 473.1002. [Compounds chart](#) [NMR](#)

[X-ray](#)#

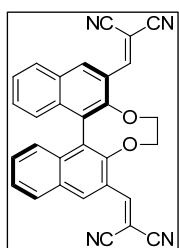

**(R)-2,2'-((4,5-dihydrodinaphtho[2,1-*e*:1',2'-*g*][1,4]dioxocine-2,7-diyl)bis(methanylylidene))dimalononitrile (BINB-2).** 62% yield. <sup>1</sup>H-NMR (400 MHz, CDCl<sub>3</sub>) δ (ppm): 8.99 (s, 2H), 8.34 (s, 2H, Ar H), 8.07 (d, 2H,  $J = 8.2$  Hz, Ar H), 7.56-7.52 (m, 2H, Ar H), 7.41-7.37 (m, 2H, Ar H), 7.04 (d, 2H,  $J = 8.5$  Hz, Ar

H), 4.57-4.50 (m, 2H, CH<sub>2</sub>), 4.05-3.98 (m, 2H, CH<sub>2</sub>); <sup>13</sup>C-NMR (101 MHz, CDCl<sub>3</sub>) δ (ppm): 154.49, 153.62, 135.76, 132.58, 130.49, 130.35, 130.22, 126.95, 126.69, 124.72, 124.03, 113.90, 112.72, 84.55, 73.19. HRMS (ESI-TOF)  $m/z$ : [M+Na]<sup>+</sup> calcd for C<sub>30</sub>H<sub>16</sub>N<sub>4</sub>O<sub>2</sub>Na<sup>+</sup>, 487.1165, found, 487.1172. [Compounds chart](#) [NMR](#) [X-ray](#)

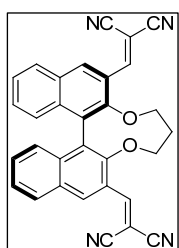

**(R)-2,2'-((5,6-dihydro-4*H*-dinaphtho[2,1-*f*:1',2'-*h*][1,5]dioxonine-2,8-diyl)bis(methanylylidene))dimalononitrile (BINB-3).** 56% yield. <sup>1</sup>H-NMR (600

MHz, CDCl<sub>3</sub>) δ (ppm): 8.90 (s, 2H), 8.21 (s, 2H, Ar H), 8.06 (d, 2H,  $J = 8.2$  Hz, Ar H), 7.53 (t, 2H,  $J = 7.4$  Hz, Ar H), 7.40 (t, 2H,  $J = 7.8$  Hz, Ar H), 6.95 (d, 2H,  $J = 8.5$  Hz, Ar H), 4.43-4.39 (m, 2H, CH<sub>2</sub>), 4.07-4.04 (m, 2H, CH<sub>2</sub>), 1.93-1.89 (m, 2H, CH<sub>2</sub>); <sup>13</sup>C-NMR (101 MHz, CDCl<sub>3</sub>) δ (ppm): 155.29, 152.15, 136.17, 132.23, 30.60, 130.24, 130.09, 126.85, 126.13, 125.65, 123.99, 113.79, 112.63, 84.03, 75.69, 30.82. HRMS (ESI-TOF)  $m/z$ : [M+Na]<sup>+</sup> calcd for C<sub>31</sub>H<sub>18</sub>N<sub>4</sub>O<sub>2</sub>Na<sup>+</sup>, 501.1322, found, 501.1320. [Compounds](#)

[chart](#) [NMR](#)#

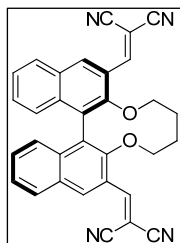

**(R)-2,2'-((4,5,6,7-tetrahydrodinaphtho[2,1-*b*:1',2'-*d*][1,6]dioxecine-2,9-diyl)bis(methanylylidene))dimalononitrile (BINB-4).** 47% yield.  $^1\text{H-NMR}$  (400 MHz,  $\text{CDCl}_3$ )  $\delta$  (ppm): 8.91 (s, 2H), 8.31 (s, 2H, Ar H), 8.04 (d, 2H,  $J = 8.2$  Hz, Ar H), 7.52 (t, 2H,  $J = 7.4$  Hz, Ar H), 7.42 (t, 2H,  $J = 8.2$  Hz, Ar H), 6.99 (d, 2H,

$J = 8.5$  Hz, Ar H), 4.12 (t, 2H,  $J = 11.6$  Hz,  $\text{CH}_2$ ), 3.93-3.89 (m, 2H,  $\text{CH}_2$ ), 1.75-1.66 (m, 2H,  $\text{CH}_2$ ), 1.50-1.41 (m, 2H,  $\text{CH}_2$ );  $^{13}\text{C-NMR}$  (101 MHz,  $\text{CDCl}_3$ )  $\delta$  (ppm): 155.68, 151.59, 136.36, 132.63, 130.72, 130.16, 129.97, 126.92, 126.30, 125.21, 123.76, 113.83, 112.71, 83.82, 75.30, 28.19. HRMS (ESI-TOF)  $m/z$ :  $[\text{M}+\text{H}]^+$  calcd for  $\text{C}_{32}\text{H}_{21}\text{N}_4\text{O}_2^+$ , 493.1659, found, 493.1608. [Compounds chart](#) [NMR](#) [X-ray#](#)

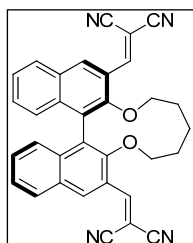

**(R)-2,2'-((9,10,11,12-tetrahydro-8*H*-dinaphtho[2,1-*b*:1',2'-*d*][1,6]dioxacycloundecine-6,14-diyl)bis(methanylylidene))dimalononitrile (BINB-5).** 33% yield.  $^1\text{H-NMR}$  (600 MHz,  $\text{CDCl}_3$ )  $\delta$  (ppm): 8.83 (s, 2H), 8.38 (s, 2H, Ar H), 8.02 (d, 2H,  $J = 8.2$  Hz, Ar H), 7.51 (t, 2H,  $J = 7.2$  Hz, Ar H), 7.44 (t, 2H,  $J =$

7.7 Hz, Ar H), 7.12 (d, 2H,  $J = 8.5$  Hz, Ar H), 4.24-4.20 (m, 2H,  $\text{CH}_2$ ), 3.93-3.89 (m, 2H,  $\text{CH}_2$ ), 1.59-1.56 (m, 2H,  $\text{CH}_2$ ), 1.50-1.45 (m, 2H,  $\text{CH}_2$ ), 1.18-1.14 (s, 2H,  $\text{CH}_2$ );  $^{13}\text{C-NMR}$  (101 MHz,  $\text{CDCl}_3$ )  $\delta$  (ppm): 156.65, 152.91, 136.14, 132.48, 130.57, 130.09, 129.76, 126.70, 125.41, 124.64, 124.06, 113.79, 112.65, 83.85, 74.10, 28.19, 20.74. HRMS (ESI-TOF)  $m/z$ :  $[\text{M}+\text{Na}]^+$  calcd for  $\text{C}_{33}\text{H}_{22}\text{N}_4\text{O}_2\text{Na}^+$ , 529.1635, found, 529.1636. [Compounds chart](#) [NMR](#)

[X-ray](#)

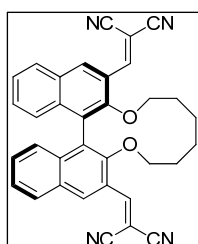

**(R)-2,2'-((2,3,4,5,6,7-hexahydrodinaphtho[2,1-*b*:1',2'-*d*][1,6]dioxacyclododecine-9,20-diyl)bis(methanylylidene))dimalononitrile (BINB-6).** 54% yield.  $^1\text{H-NMR}$  (600 MHz,  $\text{CDCl}_3$ )  $\delta$  (ppm): 8.93 (s, 2H), 8.37 (s, 2H, Ar H), 8.07 (d, 2H,  $J = 8.2$  Hz, Ar H), 7.52 (t, 2H,  $J = 7.2$  Hz, Ar H), 7.41 (t, 2H,  $J = 7.8$  Hz,

Ar H), 7.06 (d, 2H,  $J = 8.5$  Hz, Ar H), 3.69-3.66 (m, 2H,  $\text{CH}_2$ ), 3.47-3.43 (m, 2H,  $\text{CH}_2$ ),

1.30-1.26 (m, 2H, CH<sub>2</sub>), 1.17-1.15 (m, 2H, CH<sub>2</sub>), 0.91 (s, 4H, CH<sub>2</sub>); <sup>13</sup>C-NMR (151 MHz, CDCl<sub>3</sub>) δ (ppm): 155.83, 153.37, 136.76, 132.06, 130.54, 130.35, 129.96, 126.84, 125.61, 125.00, 124.88, 113.94, 112.73, 84.17, 75.89, 29.80, 26.21. HRMS (ESI-TOF) m/z: [M+Na]<sup>+</sup> calcd for C<sub>34</sub>H<sub>24</sub>N<sub>4</sub>O<sub>2</sub>Na<sup>+</sup>, 543.1791, found, 1063.3710 (2M+Na<sup>+</sup>). [Compounds chart](#)

## [NMR](#)

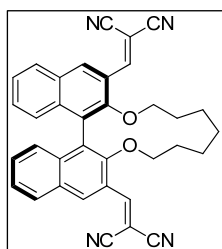

**(R)-2,2'-((3,4,5,6,7,8-hexahydro-2H-dinaphtho[2,1-b:1',2'-d][1,6]dioxacyclotridecine-10,21-diyl)bis(methanylylidene))dimalononitrile (BINB-7).**

35% yield. <sup>1</sup>H-NMR (600 MHz, CDCl<sub>3</sub>) δ (ppm): 8.92 (s, 2H), 8.44 (s, 2H, Ar H), 8.03 (d, 2H, *J* = 8.2 Hz, Ar H), 7.51 (t, 2H, *J* = 7.3 Hz, Ar H), 7.41 (t,

2H, *J* = 7.6 Hz, Ar H), 7.02 (d, 2H, *J* = 8.6 Hz, Ar H), 4.04-4.00 (m, 2H, CH<sub>2</sub>), 3.82-3.78 (m, 2H, CH<sub>2</sub>), 1.57-1.54 (m, 2H, CH<sub>2</sub>), 1.44-1.41 (m, 2H, CH<sub>2</sub>), 1.33-1.21 (m, 4H, CH<sub>2</sub>), 1.14-1.10 (m, 2H, CH<sub>2</sub>); <sup>13</sup>C-NMR (151 MHz, CDCl<sub>3</sub>) δ (ppm): 156.30, 153.01, 136.70, 132.16, 130.55, 130.20, 129.77, 126.74, 125.57, 125.17, 124.57, 113.95, 112.85, 83.76, 74.48, 27.76, 24.96, 23.04. HRMS (ESI-TOF) m/z: [M+Na]<sup>+</sup> calcd for C<sub>35</sub>H<sub>26</sub>N<sub>4</sub>O<sub>2</sub>Na<sup>+</sup>, 557.1948, found, 557.1947. [Compounds chart](#)    [NMR](#)    [X-ray](#)

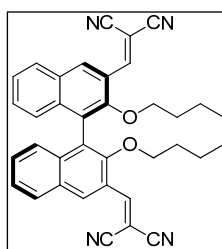

**(R)-2,2'-((2,3,4,5,6,7,8,9-octahydrodinaphtho[2,1-b:1',2'-d][1,6]dioxacyclotetradecine-11,22-diyl)bis(methanylylidene))dimalononitrile (BINB-8).**

30% yield (two steps). <sup>1</sup>H-NMR (600 MHz, CDCl<sub>3</sub>) δ (ppm): 8.95 (s, 2H), 8.42 (s, 2H, Ar H), 8.04 (d, 2H, *J* = 8.2 Hz, Ar H), 7.52 (t, 2H, *J* = 7.4 Hz,

Ar H), 7.41 (t, 2H, *J* = 8.0 Hz, Ar H), 7.00 (d, 2H, *J* = 8.5 Hz, Ar H), 3.91-3.87 (m, 2H, CH<sub>2</sub>), 3.73-3.69 (m, 2H, CH<sub>2</sub>), 1.69-1.64 (m, 2H, CH<sub>2</sub>), 1.51 (s, 2H, CH<sub>2</sub>), 1.35-1.34 (m, 2H, CH<sub>2</sub>), 1.20-1.18 (m, 6H, CH<sub>2</sub>); <sup>13</sup>C-NMR (151 MHz, CDCl<sub>3</sub>) δ (ppm): 156.05, 153.02, 136.74, 132.03, 130.52, 130.25, 129.88, 126.83, 125.53, 125.28, 124.86, 113.97, 112.88, 83.78, 74.55, 26.80, 24.17, 23.28. HRMS (ESI-TOF) m/z: [M+Na]<sup>+</sup> calcd for C<sub>36</sub>H<sub>28</sub>N<sub>4</sub>O<sub>2</sub>Na<sup>+</sup>,

571.2104, found, 571.2089. [Compounds chart](#) [NMR](#) [X-ray](#)

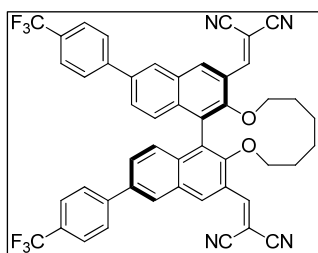

**(R)-2,2'-((12,17-bis(4-(trifluoromethyl)phenyl)-2,3,4,5,6,7-hexahydrodinaphtho[2,1-*b*:1',2'-*d*][1,6]dioxacyclododecine-9,20-diyl)bis(methanylylidene))dimalononitrile (BINB-6A).** 70% yield.  $^1\text{H-NMR}$

(600 MHz,  $\text{CDCl}_3$ )  $\delta$  (ppm): 9.00 (s, 2H), 8.53 (s, 2H, Ar H), 8.24 (d,

2H,  $J = 1.6$  Hz, Ar H), 7.80-7.73 (m, 10H, Ar H), 7.41 (d, 2H,  $J = 8.9$  Hz, Ar H), 4.06-4.01

(m, 2H,  $\text{CH}_2$ ), 3.75-3.71 (m, 2H,  $\text{CH}_2$ ), 1.78-1.73 (m, 2H,  $\text{CH}_2$ ), 1.51-1.47 (m, 2H,  $\text{CH}_2$ ),

1.39-1.35 (m, 2H,  $\text{CH}_2$ ), 1.13-1.07 (m, 2H,  $\text{CH}_2$ );  $^{13}\text{C-NMR}$  (151 MHz,  $\text{CDCl}_3$ )  $\delta$  (ppm):

155.96, 151.67, 143.13, 138.15, 134.71, 132.48, 130.39, 130.23, 130.18, 129.97, 129.89,

128.19, 127.67, 126.47, 126.21, 126.19, 125.83, 125.17, 123.36, 122.45, 113.80, 112.78,

108.82, 84.54, 71.01, 28.72, 22.66. HRMS (ESI-TOF)  $m/z$ :  $[\text{M}+\text{Na}]^+$  calcd for

$\text{C}_{48}\text{H}_{30}\text{F}_6\text{N}_4\text{O}_2\text{Na}^+$ , 831.2165, found, 831.2173. [Compounds chart](#) [NMR](#) [X-ray](#)

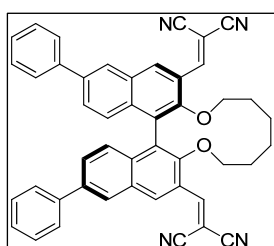

**(R)-2,2'-((12,17-diphenyl-2,3,4,5,6,7-hexahydrodinaphtho[2,1-*b*:1',2'-*d*][1,6]dioxacyclododecine-9,20-diyl)bis(methanylylidene))dimalononitrile (BINB-6B).** 45% yield.  $^1\text{H-NMR}$  (600 MHz,  $\text{CDCl}_3$ )  $\delta$  (ppm): 9.00

(s, 2H), 8.54 (s, 2H, Ar H), 8.22 (s, 2H, Ar H), 7.76 (d, 2H,  $J = 8.9$  Hz, Ar H), 7.69 (d, 4H,  $J = 7.7$  Hz, Ar H), 7.50 (t, 4H,  $J = 7.6$  Hz, Ar H), 7.43-7.38 (m, 4H, Ar H),

4.06-4.01 (m, 2H,  $\text{CH}_2$ ), 3.74-3.69 (m, 2H,  $\text{CH}_2$ ), 1.77-1.74 (m, 2H,  $\text{CH}_2$ ), 1.52-1.47 (m, 2H,

$\text{CH}_2$ ), 1.39-1.34 (m, 2H,  $\text{CH}_2$ ), 1.11-1.08 (m, 2H,  $\text{CH}_2$ );  $^{13}\text{C-NMR}$  (151 MHz,  $\text{CDCl}_3$ )  $\delta$

(ppm): 156.12, 151.21, 139.67, 139.64, 134.42, 132.33, 130.33, 130.11, 129.25, 128.23,

127.64, 127.36, 126.19, 125.57, 122.54, 113.97, 112.90, 84.01, 70.83, 28.72, 22.70. HRMS

(ESI-TOF)  $m/z$ :  $[\text{M}+\text{Na}]^+$  calcd for  $\text{C}_{46}\text{H}_{32}\text{N}_4\text{O}_2\text{Na}^+$ , 695.2417, found, 695.2404. [Compounds](#)

[chart](#) [NMR#](#)



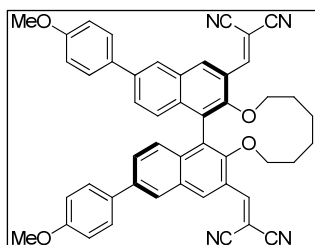

**(R)-2,2'-((12,17-bis(4-methoxyphenyl)-2,3,4,5,6,7-hexahydroindaphtho[2,1-*b*:1',2'-*d*][1,6]dioxacyclododecine-9,20-diyl)bis(methanylylidene))dimalononitrile (BINB-6C).** 67% yield.  $^1\text{H-NMR}$  (600 MHz,  $\text{CDCl}_3$ )  $\delta$  (ppm): 8.98 (s, 2H), 8.53 (s, 2H, Ar H), 8.16 (s, 2H, Ar H),

7.73-7.71 (m, 2H, Ar H), 7.63 (d, 4H,  $J = 8.6$  Hz, Ar H), 7.35 (d, 2H,  $J = 8.9$  Hz, Ar H), 7.03 (d, 4H,  $J = 8.7$  Hz, Ar H), 4.04-3.99 (m, 2H,  $\text{CH}_2$ ), 3.87 (s, 6H,  $\text{CH}_3$ ), 3.72-3.67 (m, 2H,  $\text{CH}_2$ ), 1.78-1.72 (m, 2H,  $\text{CH}_2$ ), 1.49-1.46 (m, 2H,  $\text{CH}_2$ ), 1.39-1.36 (m, 2H,  $\text{CH}_2$ ), 1.10-1.07 (m, 2H,  $\text{CH}_2$ );  $^{13}\text{C-NMR}$  (151 MHz,  $\text{CDCl}_3$ )  $\delta$  (ppm): 159.94, 156.18, 150.93, 139.24, 134.10, 132.14, 132.03, 130.20, 130.14, 128.42, 126.76, 126.12, 125.50, 122.58, 114.72, 114.02, 112.95, 83.80, 70.77, 55.55, 28.69, 22.71. HRMS (ESI-TOF)  $m/z$ :  $[\text{M}+\text{Na}]^+$  calcd for  $\text{C}_{48}\text{H}_{36}\text{N}_4\text{O}_4\text{Na}^+$ , 755.2629, found, 755.2624. [Compounds chart](#) [NMR](#)

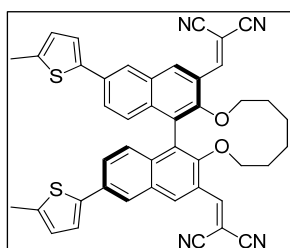

**(R)-2,2'-((12,17-bis(5-methylthiophen-2-yl)-2,3,4,5,6,7-hexahydroindaphtho[2,1-*b*:1',2'-*d*][1,6]dioxacyclododecine-9,20-diyl)bis(methanylylidene))dimalononitrile (BINB-6D).** 49% yield.  $^1\text{H-NMR}$  (400 MHz,  $\text{CDCl}_3$ )  $\delta$  (ppm): 8.88 (s, 2H), 8.49 (s, 2H, Ar H), 8.10 (s, 2H, Ar H),

7.68 (d, 2H,  $J = 13.4$  Hz, Ar H), 7.27-7.23 (m, 4H, Ar H), 6.78 (d, 2H,  $J = 4.7$  Hz, Ar H), 4.00-3.94 (m, 2H,  $\text{CH}_2$ ), 3.71-3.64 (m, 2H,  $\text{CH}_2$ ), 2.54 (s, 6H,  $\text{CH}_3$ ), 1.77-1.68 (m, 2H,  $\text{CH}_2$ ), 1.47-1.42 (m, 2H,  $\text{CH}_2$ ), 1.37-1.31 (m, 2H,  $\text{CH}_2$ ), 1.08-1.04 (m, 2H,  $\text{CH}_2$ );  $^{13}\text{C-NMR}$  (151 MHz,  $\text{CDCl}_3$ )  $\delta$  (ppm): 155.90, 150.91, 141.21, 140.37, 133.89, 133.08, 131.85, 130.02, 128.37, 126.90, 126.14, 125.57, 124.86, 124.28, 122.55, 113.92, 112.79, 83.88, 70.94, 28.56, 22.65, 15.72. HRMS (ESI-TOF)  $m/z$ :  $[\text{M}+\text{Na}]^+$  calcd for  $\text{C}_{44}\text{H}_{32}\text{N}_4\text{O}_2\text{Na}^+$ , 735.1859, found, 735.1864. [Compounds chart](#) [NMR](#)

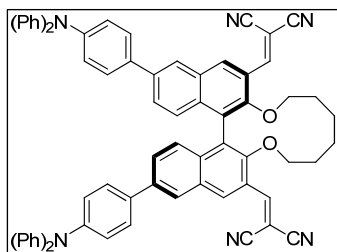

**(R)-2,2'-((12,17-bis(4-(diphenylamino)phenyl)-2,3,4,5,6,7-hexahydroindaphtho[2,1-*b*:1',2'-*d*][1,6]dioxacyclododecine-9,20-diyl)bis(methanylylidene))dimalononitrile (BINB-6E).** 82% yield.

$^1\text{H-NMR}$  (400 MHz,  $\text{CDCl}_3$ )  $\delta$  (ppm): 8.97 (s, 2H), 8.53 (s, 2H, Ar H), 8.16 (s, 2H, Ar H), 7.74-7.72 (m, 2H, Ar H), 7.35 (d, 4H,  $J = 8.9$  Hz, Ar H), 7.74-7.72 (m, 2H, Ar H), 7.31-7.27 (m, 8H, Ar H), 7.17-7.14 (m, 12H, Ar H), 7.08-7.04 (m, 4H, Ar H), 4.04-3.98 (m, 2H,  $\text{CH}_2$ ), 3.72-3.66 (m, 2H,  $\text{CH}_2$ ), 1.77-1.72 (m, 2H,  $\text{CH}_2$ ), 1.54-1.43 (m, 2H,  $\text{CH}_2$ ), 1.39-1.36 (m, 2H,  $\text{CH}_2$ ), 1.13-1.04 (m, 2H,  $\text{CH}_2$ );  $^{13}\text{C-NMR}$  (101 MHz,  $\text{CDCl}_3$ )  $\delta$  (ppm): 156.17, 150.93, 148.12, 147.57, 139.14, 134.12, 132.98, 132.14, 130.20, 130.01, 129.51, 127.98, 126.72, 126.13, 125.51, 124.89, 124.86, 123.65, 123.59, 123.48, 123.40, 122.57, 114.01, 112.93, 83.82, 70.74, 28.69, 22.71. HRMS (ESI-TOF)  $m/z$ :  $[\text{M}+\text{Na}]^+$  calcd for  $\text{C}_{70}\text{H}_{50}\text{N}_6\text{O}_2\text{Na}^+$ , 1029.3893, found, 1029.3850. [Compounds chart](#) [NMR](#)

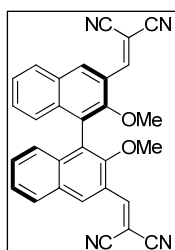

**(R)-2,2'-((2,2'-dimethoxy-[1,1'-binaphthalene]-3,3'-diyl)bis(methanylylidene))dimalononitrile (BINUB-1).** 54% yield.  $^1\text{H-NMR}$  (400 MHz,  $\text{CDCl}_3$ )  $\delta$

(ppm): 8.98 (s, 2H), 8.36 (s, 2H, Ar H), 8.07 (d, 2H,  $J = 8.2$  Hz, Ar H), 7.55 (t, 2H,  $J = 7.8$  Hz, Ar H), 7.46 (t, 2H,  $J = 7.8$  Hz, Ar H), 7.14 (d, 2H,  $J = 8.4$  Hz, Ar H), 3.36 (s, 6H,  $\text{CH}_3$ );  $^{13}\text{C-NMR}$  (101 MHz,  $\text{CDCl}_3$ )  $\delta$  (ppm): 155.09, 154.30, 136.73,

132.22, 130.71, 130.44, 129.98, 126.92, 125.55, 124.55, 124.48, 113.89, 112.86, 84.18, 62.93. [Compounds chart](#) [NMR](#)

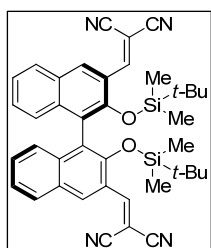

**(R)-2,2'-((2,2'-bis((tert-butyl)dimethylsilyloxy)-[1,1'-binaphthalene]-3,3'-diyl)bis(methanylylidene))dimalononitrile (BINUB-2).** 52% yield.

$^1\text{H-NMR}$  (400 MHz,  $\text{CDCl}_3$ )  $\delta$  (ppm): 8.83 (s, 2H), 8.25 (s, 2H, Ar H), 7.99 (d, 2H,  $J = 8.0$  Hz, Ar H), 7.48-7.44 (m, 2H, Ar H), 7.42-7.38 (m, 2H, Ar H),

7.14 (d, 2H,  $J = 8.4$  Hz, Ar H), 0.81 (s, 18H, *t*-Bu), -0.09 (s, 6H,  $\text{CH}_3$ ), -1.15 (s, 6H,  $\text{CH}_3$ );

$^{13}\text{C}$ -NMR (101 MHz,  $\text{CDCl}_3$ )  $\delta$  (ppm): 156.84, 149.86, 137.64, 131.62, 130.25, 128.86, 126.57, 125.84, 124.46, 122.57, 113.75, 112.72, 83.21, 25.47, 18.34, -3.68, -4.43.

[Compounds chart](#)     [NMR](#)

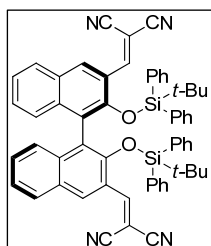

**(R)-2,2'-((2,2'-bis((tert-butyl)diphenylsilyl)oxy)-[1,1'-binaphthalene]-3,3'-diyl)bis(methanylylidene)dimalononitrile (BINUB-3).** 36% yield.

$^1\text{H}$ -NMR (600 MHz,  $\text{CDCl}_3$ )  $\delta$  (ppm): 8.36 (s, 2H), 7.91 (d, 2H,  $J = 7.9$  Hz, Ar H), 7.88 (s, 2H, Ar H), 7.81 (d, 4H,  $J = 7.1$  Hz, Ar H), 7.52 (t, 2H,  $J = 7.5$

Hz, Ar H), 7.43-7.35 (m, 14H, Ar H), 7.23 (t, 4H,  $J = 7.6$  Hz, Ar H), 7.18 (d, 2H,  $J = 7.9$  Hz, Ar H), 0.43 (s, 18H,  $\text{CH}_3$ );  $^{13}\text{C}$ -NMR (151 MHz,  $\text{CDCl}_3$ )  $\delta$  (ppm): 158.23, 149.93, 137.18, 135.40, 135.04, 132.39, 131.48, 130.99, 129.94, 128.94, 128.73, 128.36, 125.82, 124.05, 123.12, 113.00, 112.12, 83.46, 25.47, 19.49. [Compounds chart](#)     [NMR](#)

## 4. UV-vis Spectra

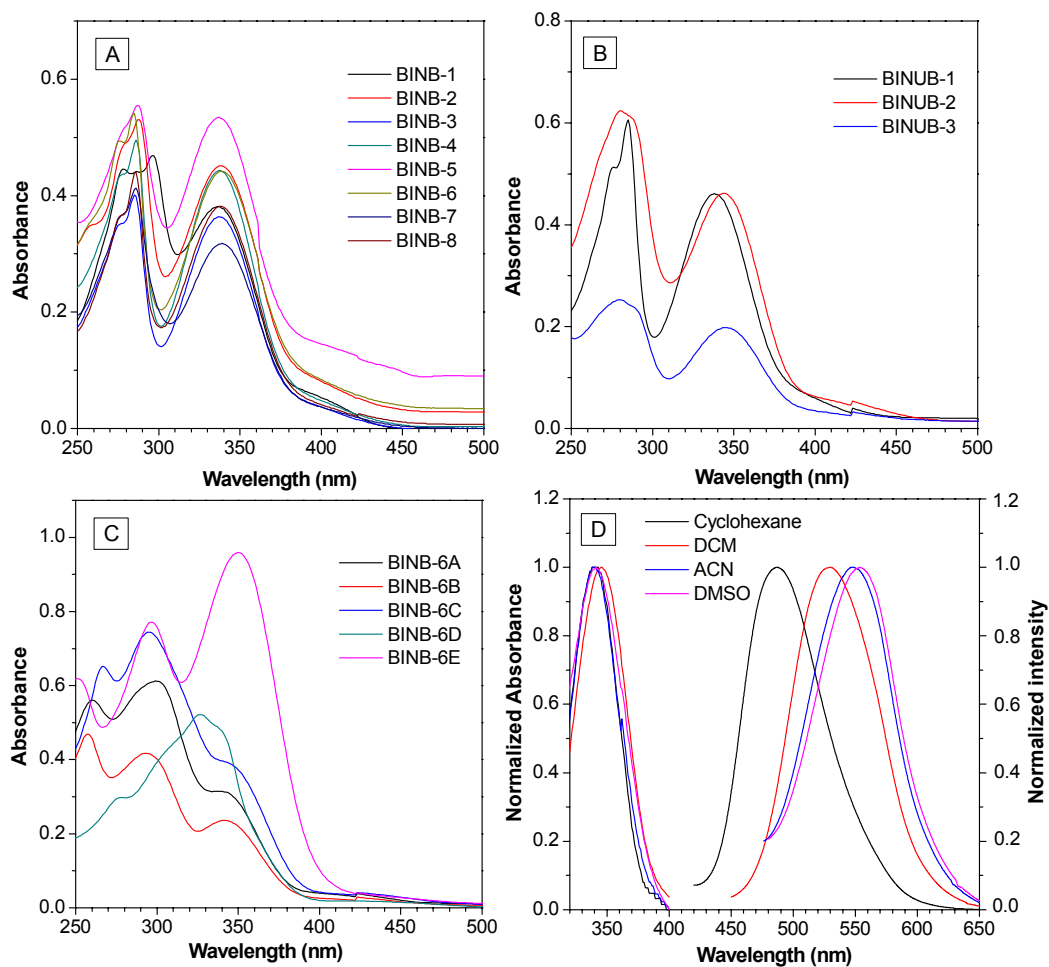

Fig. S1 UV-vis spectra of compounds (A) **BINB-1** to **BINB-8** (10  $\mu$ M) (B) **BINUB-1** to **BINUB-3** (10  $\mu$ M) (C) **BINB-6A** to **BINB-6E** (10  $\mu$ M) (D) UV-vis and emission spectra of **BINB-6** in different solvents (10  $\mu$ M).

## 5. Photoluminescence Properties

### 5.1 Optical properties of BINUB-1 to BINUB-3

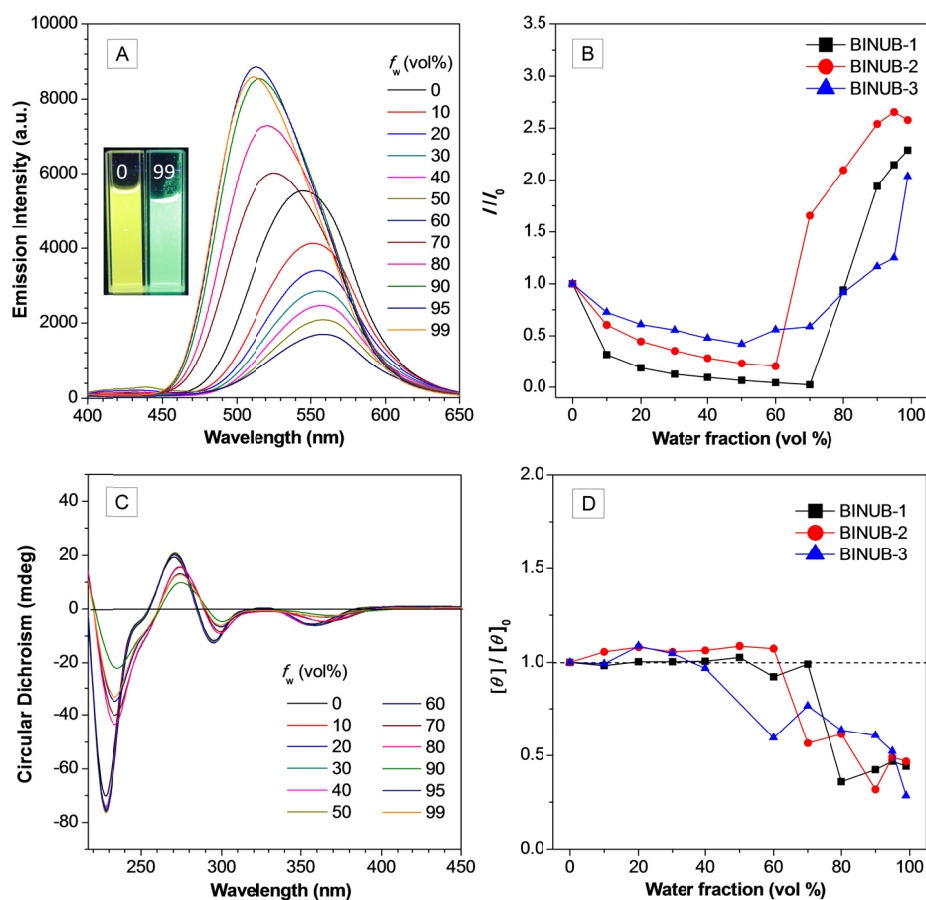

Fig. S2 (A) Emission spectra and (C) CD spectra of **BINUB-2** in acetonitrile/water mixtures with different water fraction ( $f_w$ ). (B) Plot of emission intensity at 520 nm and (D) CD intensity at 230 nm *versus* the composition of  $f_w$  for **BINUB-1** to **BINUB-3**. Inset in A: photograph of **BINUB-2** in acetonitrile/water mixtures with  $f_w$  values of 0 and 99% under 365 nm UV irradiation.

## 5.2 Solid state emission and their CIE diagram

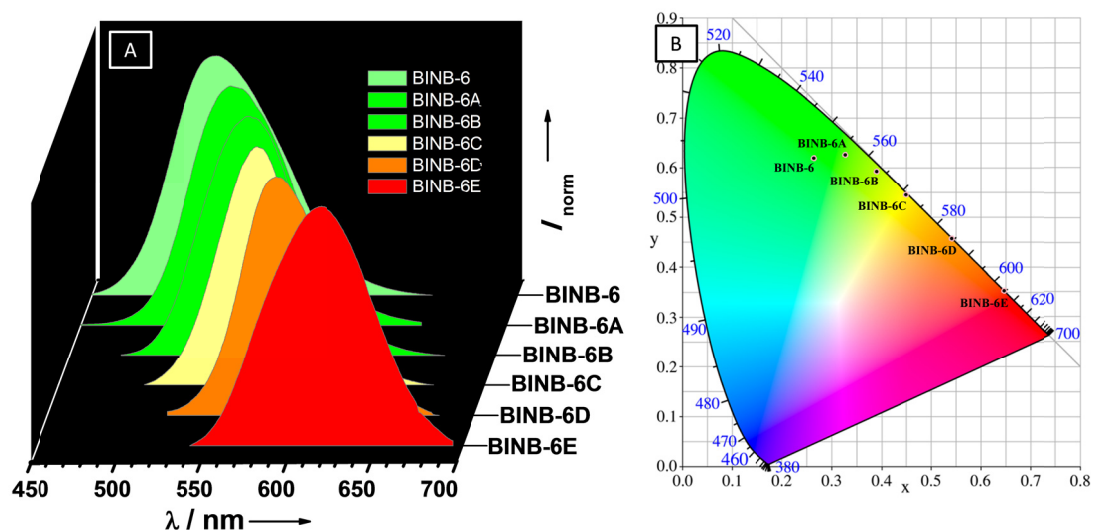

Fig. S3 (A) Emission spectra of **BINB-6** to **BINB-6E** in the solid states. (B) Emission spectra of compounds **BINB-6** to **BINB-6E** plotted on a CIE 1931 chromaticity diagram.

Table S1. Coordinates of compounds **BINB-6** to **BINB-6E** on CIE diagram.

| Compd          | $\lambda_{em}$ (nm) | Coordinate (X) | Coordinate (Y) |
|----------------|---------------------|----------------|----------------|
| <b>BINB-6</b>  | 518                 | 0.2634         | 0.6195         |
| <b>BINB-6A</b> | 538                 | 0.327          | 0.6271         |
| <b>BINB-6B</b> | 555                 | 0.3888         | 0.5937         |
| <b>BINB-6C</b> | 566                 | 0.4491         | 0.5447         |
| <b>BINB-6D</b> | 584                 | 0.5408         | 0.4572         |
| <b>BINB-6E</b> | 617                 | 0.646          | 0.3536         |

## 5.3 Emission of BINB6 to BINB-6D after self-assembly.

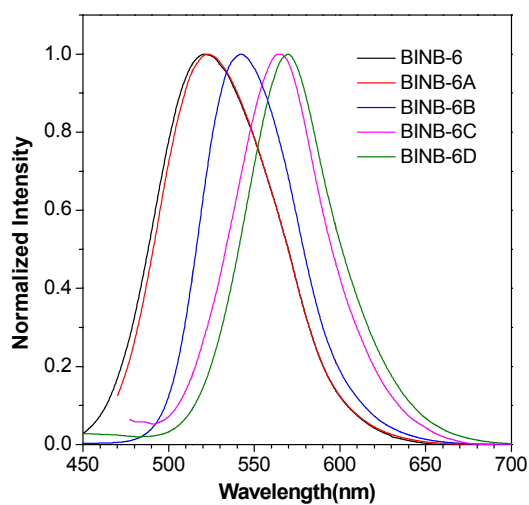

Fig. S4 Emission spectra of **BINB-6** to **BINB-6D** after self-assembly.

## 5.4 Summary of the optical properties

Table S2. Optical properties of **BINB-1** to **BINB-5**, and **BINB-7** to **BINB-8**.

| Compds        | Solution state <sup>a</sup>                |                                                   |                            |                                    |                                       | Solid state                |                                    |                                       |
|---------------|--------------------------------------------|---------------------------------------------------|----------------------------|------------------------------------|---------------------------------------|----------------------------|------------------------------------|---------------------------------------|
|               | $\lambda_{\text{abs}}$ [nm] <sup>[a]</sup> | $\varepsilon$ [M <sup>-1</sup> cm <sup>-1</sup> ] | $\lambda_{\text{em}}$ [nm] | $\Phi_{\text{F}}$ [%] <sup>b</sup> | $\tau_{\text{avg}}$ [ns] <sup>c</sup> | $\lambda_{\text{em}}$ [nm] | $\Phi_{\text{F}}$ [%] <sup>b</sup> | $\tau_{\text{avg}}$ [ns] <sup>c</sup> |
| <b>BINB-1</b> | 337                                        | 38100                                             | 552                        | 8.3                                | 4.76                                  | 525                        | 17.2                               | 6.13                                  |
| <b>BINB-2</b> | 338                                        | 45100                                             | 514                        | 6.1                                | 2.88                                  | 512                        | 13.7                               | 4.16                                  |
| <b>BINB-3</b> | 337                                        | 36400                                             | 540                        | 9.9                                | 4.79                                  | 515                        | 11.9                               | 3.44                                  |
| <b>BINB-4</b> | 338                                        | 44300                                             | 544                        | 7.6                                | 3.59                                  | 514                        | 12.5                               | 4.41                                  |
| <b>BINB-5</b> | 337                                        | 53500                                             | 544                        | 9.9                                | 5.00                                  | 524                        | 12.7                               | 3.63                                  |
| <b>BINB-7</b> | 339                                        | 31800                                             | 553                        | 10.6                               | 5.37                                  | 522                        | 13.1                               | 3.98                                  |
| <b>BINB-8</b> | 338                                        | 38200                                             | 551                        | 10.1                               | 5.08                                  | 523                        | 14.3                               | 4.19                                  |

<sup>a</sup>Acetonitrile solution (10  $\mu\text{M}$ ); <sup>b</sup>Absolute fluorescence quantum yield measured using the calibrated integrating sphere system. Longest wavelength absorption maximum in acetonitrile. <sup>c</sup>Mean fluorescence lifetime ( $\tau_{\text{avg}}$ ) calculated by using the equation  $\tau_{\text{avg}} = A_1\tau_1 + A_2\tau_2$ .

Table S3. Optical properties of **BINUB-1** to **BINUB-3**.

| Compds         | Solution state <sup>a</sup>                |                                                   |                            |                                    |                                       | Solid state                |                                    |                                       |
|----------------|--------------------------------------------|---------------------------------------------------|----------------------------|------------------------------------|---------------------------------------|----------------------------|------------------------------------|---------------------------------------|
|                | $\lambda_{\text{abs}}$ [nm] <sup>[a]</sup> | $\varepsilon$ [M <sup>-1</sup> cm <sup>-1</sup> ] | $\lambda_{\text{em}}$ [nm] | $\Phi_{\text{F}}$ [%] <sup>b</sup> | $\tau_{\text{avg}}$ [ns] <sup>c</sup> | $\lambda_{\text{em}}$ [nm] | $\Phi_{\text{F}}$ [%] <sup>b</sup> | $\tau_{\text{avg}}$ [ns] <sup>c</sup> |
| <b>BINUB-1</b> | 338                                        | 46100                                             | 546                        | 7.7                                | 4.77                                  | 519                        | 18.0                               | 7.06                                  |
| <b>BINUB-2</b> | 344                                        | 46200                                             | 545                        | 12.3                               | 6.53                                  | 510                        | 14.4                               | 5.54                                  |
| <b>BINUB-3</b> | 346                                        | 19800                                             | 531                        | 8.9                                | 5.32                                  | 486                        | 11.5                               | 4.09                                  |

<sup>a</sup>Acetonitrile solution (10  $\mu\text{M}$ ); <sup>b</sup>Absolute fluorescence quantum yield measured using the calibrated integrating sphere system. Longest wavelength absorption maximum in acetonitrile. <sup>c</sup>Mean fluorescence lifetime ( $\tau_{\text{avg}}$ ) calculated by using the equation  $\tau_{\text{avg}} = A_1\tau_1 + A_2\tau_2$ .

Table S4. The fluorescence lifetime of all compounds.

| Compds        | Lifetime in solution (ns)                      | Lifetime in solid (ns)                          | Compds         | Lifetime in solution (ns)                      | Lifetime in solid (ns) |
|---------------|------------------------------------------------|-------------------------------------------------|----------------|------------------------------------------------|------------------------|
| <b>BINB-1</b> | $\tau_1 = 3.55$ (5%)<br>$\tau_2 = 4.83$ (95%)  | $\tau_1 = 2.58$ (55%)<br>$\tau_2 = 10.48$ (45%) | <b>BINB-6A</b> | $\tau_1 = 2.92$ (11%)<br>$\tau_2 = 5.29$ (89%) | $\tau_1 = 4.85$        |
| <b>BINB-2</b> | $\tau_1 = 3.00$ (76%)<br>$\tau_2 = 2.48$ (24%) | $\tau_1 = 2.3$ (64%)<br>$\tau_2 = 7.36$ (36%)   | <b>BINB-6B</b> | $\tau_1 = 2.05$ (13%)<br>$\tau_2 = 4.69$ (87%) | $\tau_1 = 6.34$        |
| <b>BINB-3</b> | $\tau_1 = 1.67$ (17%)<br>$\tau_2 = 5.44$ (83%) | $\tau_1 = 2.22$ (70%)<br>$\tau_2 = 6.28$ (30%)  | <b>BINB-6C</b> | $\tau_1 = 0.89$ (98%)<br>$\tau_2 = 5.15$ (2%)  | $\tau_1 = 7.54$        |
| <b>BINB-4</b> | $\tau_1 = 1.45$ (29%)<br>$\tau_2 = 4.46$ (71%) | $\tau_1 = 2.49$ (42%)<br>$\tau_2 = 5.80$ (58%)  | <b>BINB-6D</b> | $\tau_1 = 0.95$ (37%)<br>$\tau_2 = 5.16$ (63%) | $\tau_1 = 6.15$        |
| <b>BINB-5</b> | $\tau_1 = 5.00$                                | $\tau_1 = 1.88$ (56%)<br>$\tau_2 = 5.85$ (44%)  | <b>BINB-6E</b> | $\tau_1 = 1.36$ (11%)<br>$\tau_2 = 4.72$ (89%) | $\tau_1 = 9.06$        |
| <b>BINB-6</b> | $\tau_1 = 1.59$ (5%)<br>$\tau_2 = 5.17$ (95%)  | $\tau_1 = 5.38$                                 | <b>BINUB-1</b> | $\tau_1 = 4.77$                                | $\tau_1 = 7.06$        |
| <b>BINB-7</b> | $\tau_1 = 5.37$                                | $\tau_1 = 3.98$                                 | <b>BINUB-2</b> | $\tau_1 = 6.53$                                | $\tau_1 = 5.54$        |
| <b>BINB-8</b> | $\tau_1 = 5.08$                                | $\tau_1 = 2.32$ (47%)<br>$\tau_2 = 5.85$ (53%)  | <b>BINUB-3</b> | $\tau_1 = 5.32$                                | $\tau_1 = 4.09$        |

Table S5. The rate constants for radiative ( $k_r$ ) and nonradiative decay ( $k_{nr}$ ) were calculated from the  $\Phi$  and  $\tau$  values according to the formulae  $k_r = \Phi_F/\tau$  and  $k_{nr} = (1-\Phi_F)/\tau$ .

| Compds        | Solution state      |                       | Film state          |                       | Compds         | Solution state      |                       | Film state          |                       |
|---------------|---------------------|-----------------------|---------------------|-----------------------|----------------|---------------------|-----------------------|---------------------|-----------------------|
|               | $k_r$ ( $s^{-1}$ )  | $k_{nr}$ ( $s^{-1}$ ) | $k_r$ ( $s^{-1}$ )  | $k_{nr}$ ( $s^{-1}$ ) |                | $k_r$ ( $s^{-1}$ )  | $k_{nr}$ ( $s^{-1}$ ) | $k_r$ ( $s^{-1}$ )  | $k_{nr}$ ( $s^{-1}$ ) |
| <b>BINB-1</b> | $1.744 \times 10^7$ | $1.926 \times 10^8$   | $2.806 \times 10^7$ | $1.351 \times 10^8$   | <b>BINB-6A</b> | $1.829 \times 10^7$ | $1.805 \times 10^8$   | $2.722 \times 10^7$ | $1.790 \times 10^8$   |
| <b>BINB-2</b> | $2.118 \times 10^7$ | $3.260 \times 10^8$   | $3.293 \times 10^7$ | $2.075 \times 10^8$   | <b>BINB-6B</b> | $1.517 \times 10^7$ | $2.147 \times 10^8$   | $1.877 \times 10^7$ | $1.390 \times 10^8$   |
| <b>BINB-3</b> | $2.067 \times 10^7$ | $1.881 \times 10^8$   | $3.459 \times 10^7$ | $2.561 \times 10^8$   | <b>BINB-6C</b> | $5.051 \times 10^6$ | $1.005 \times 10^9$   | $1.459 \times 10^7$ | $1.180 \times 10^8$   |
| <b>BINB-4</b> | $2.117 \times 10^7$ | $2.574 \times 10^8$   | $2.834 \times 10^7$ | $1.984 \times 10^8$   | <b>BINB-6D</b> | $1.950 \times 10^6$ | $2.766 \times 10^8$   | $7.805 \times 10^6$ | $1.548 \times 10^8$   |
| <b>BINB-5</b> | $1.980 \times 10^7$ | $1.802 \times 10^8$   | $3.499 \times 10^7$ | $2.405 \times 10^8$   | <b>BINB-6E</b> | $6.897 \times 10^5$ | $2.292 \times 10^8$   | $1.876 \times 10^6$ | $1.085 \times 10^8$   |
| <b>BINB-6</b> | $1.727 \times 10^7$ | $1.835 \times 10^8$   | $2.993 \times 10^7$ | $1.559 \times 10^8$   | <b>BINUB-1</b> | $1.614 \times 10^7$ | $1.935 \times 10^8$   | $2.549 \times 10^7$ | $1.161 \times 10^8$   |
| <b>BINB-7</b> | $1.974 \times 10^7$ | $1.665 \times 10^8$   | $3.291 \times 10^7$ | $2.183 \times 10^8$   | <b>BINUB-2</b> | $1.884 \times 10^7$ | $1.343 \times 10^8$   | $2.599 \times 10^7$ | $1.545 \times 10^8$   |
| <b>BINB-8</b> | $1.988 \times 10^7$ | $1.770 \times 10^8$   | $3.413 \times 10^7$ | $2.045 \times 10^8$   | <b>BINUB-3</b> | $1.673 \times 10^7$ | $1.712 \times 10^8$   | $2.812 \times 10^7$ | $2.164 \times 10^8$   |



## 5.5 Aggregation-induced emission properties of target compounds

Nanoaggregates preparation: 1 mM stock solutions of target compounds in acetonitrile were firstly prepared. Then aliquots of above stock solution were transferred into 5 mL volumetric flasks. And appropriate amounts of water were added to obtain 10  $\mu\text{M}$  solution with different water fractions (0 vol%, 10 vol%, 20 vol%, 30 vol%, 40 vol%, 50 vol%, 60 vol%, 70 vol%, 80 vol%, 90 vol%, 95 vol%, 99 vol%). After that, the PL measurements of the resulting solutions were performed immediately.

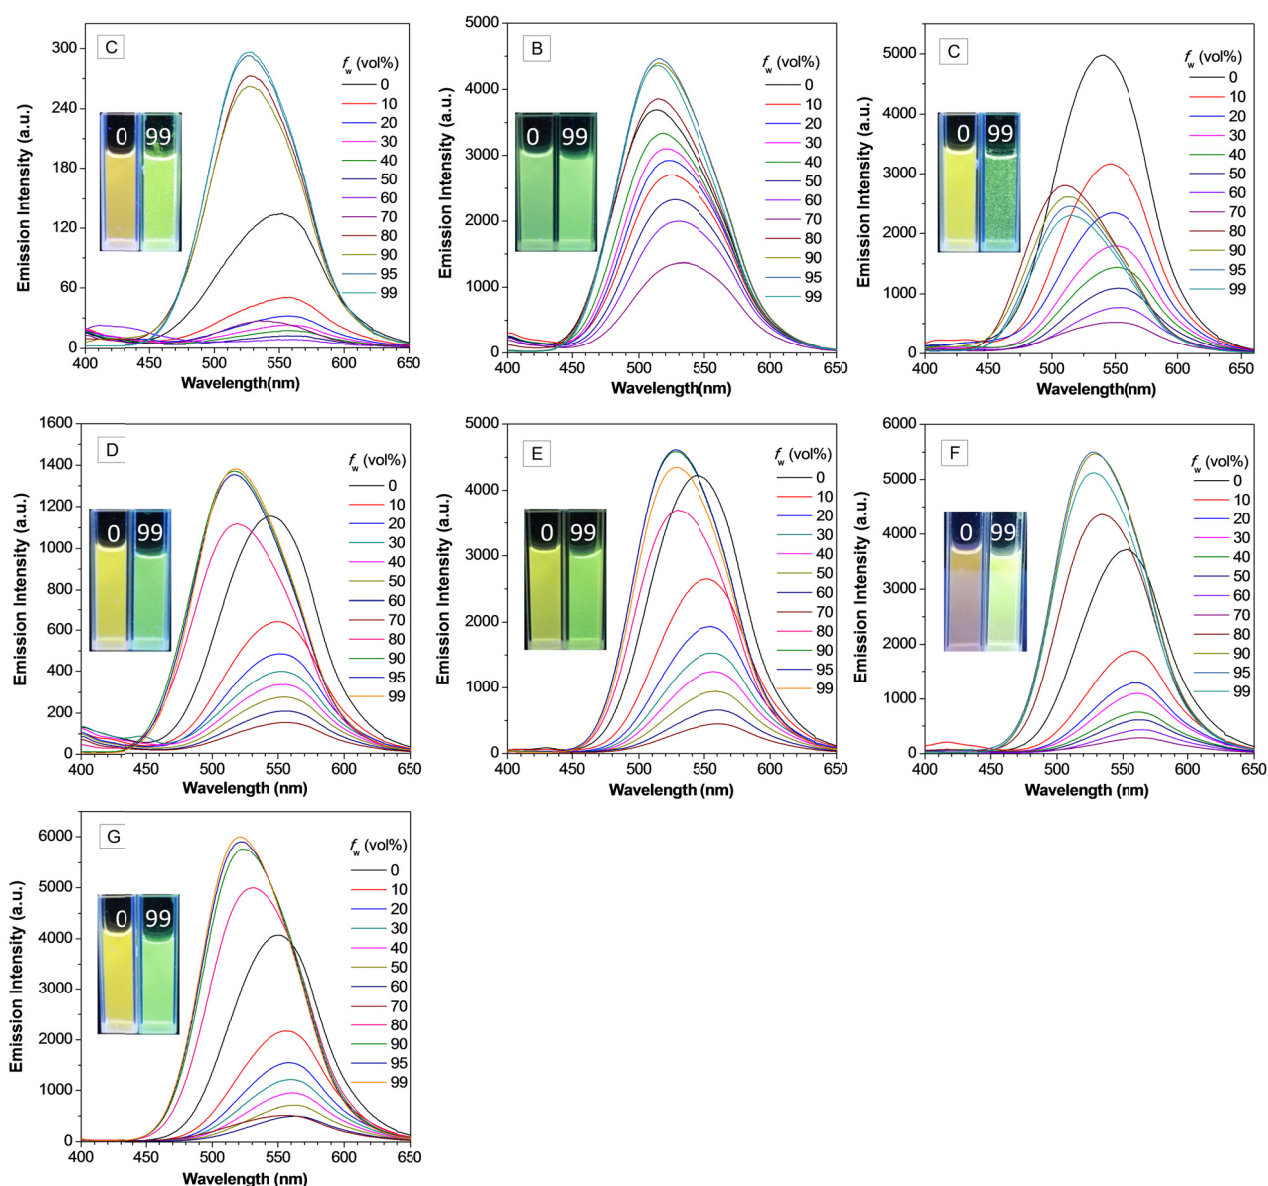

Fig. S5 Emission spectra of (A) **BINB-1**, (B) **BINB-2**, (C) **BINB-3**, (D) **BINB-4**, (E) **BINB-5**, (F) **BINB-7**, (G) **BINB-8** (10  $\mu\text{M}$ ) in acetonitrile and acetonitrile/water mixtures with different  $f_w$ . Inset: photograph of corresponding fluorogens in acetonitrile/water mixtures with  $f_w$  values of 0 and 99% under 365 nm UV irradiation.

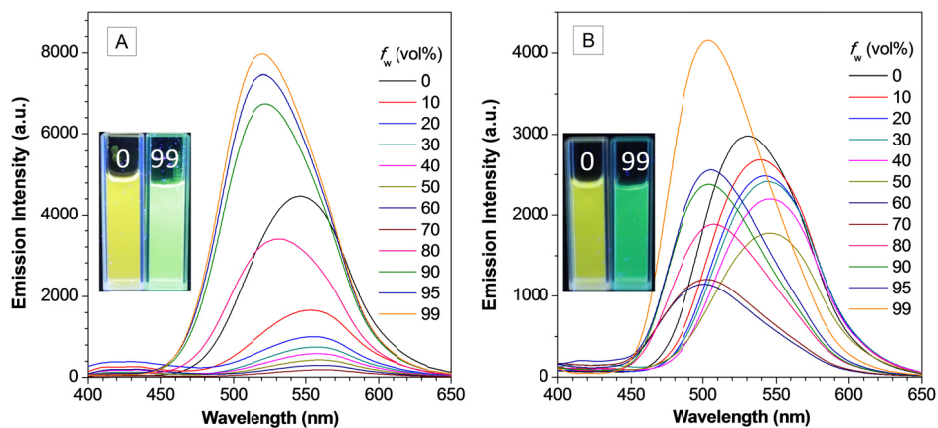

Fig. S6 Emission spectra of (A) **BINUB-1**, (B) **BINUB-2** ( $10 \mu\text{M}$ ) in acetonitrile and acetonitrile/water mixtures with different  $f_w$ . Inset: photograph of corresponding fluorogens in acetonitrile/water mixtures with  $f_w$  values of 0 and 99% under 365 nm UV irradiation.

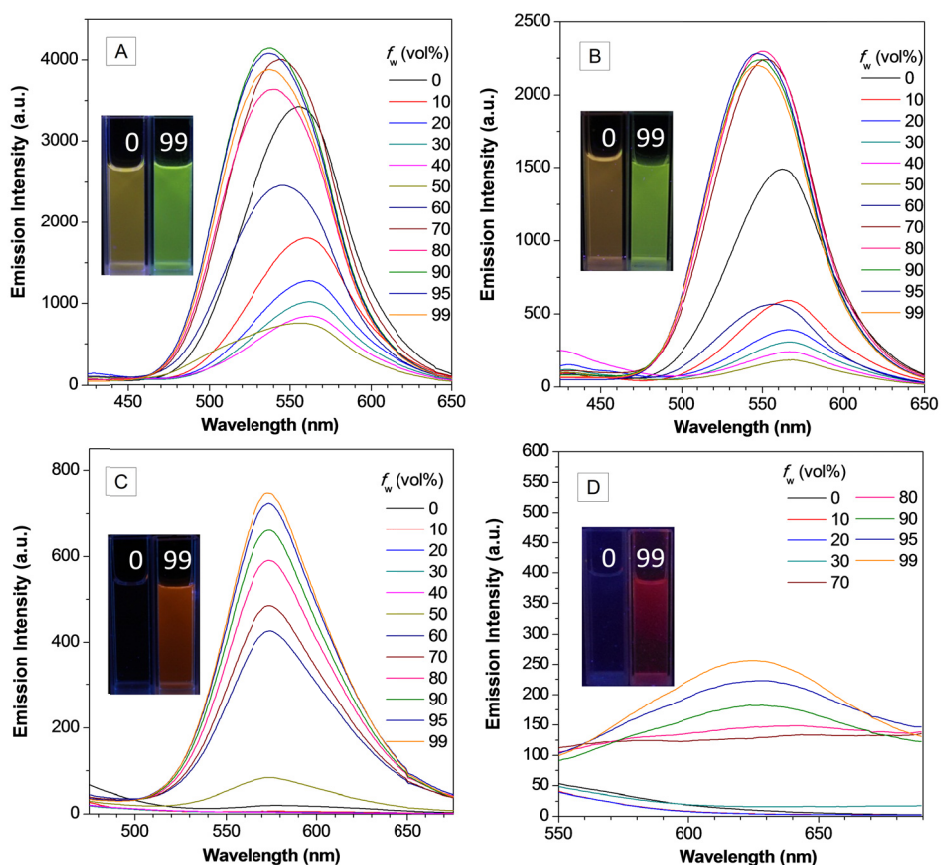

Fig. S7 Emission spectra of (A) **BINB-6A**, (B) **BINB-6B**, (C) **BINB-6D**, (D) **BINB-6E** ( $10 \mu\text{M}$ ) in acetonitrile and acetonitrile/water mixtures with different  $f_w$ . Inset: photograph of corresponding fluorogens in acetonitrile/water mixtures with  $f_w$  values of 0 and 99% under 365 nm UV irradiation.

## 5.6 Dynamic light scattering (DLS) of target compounds

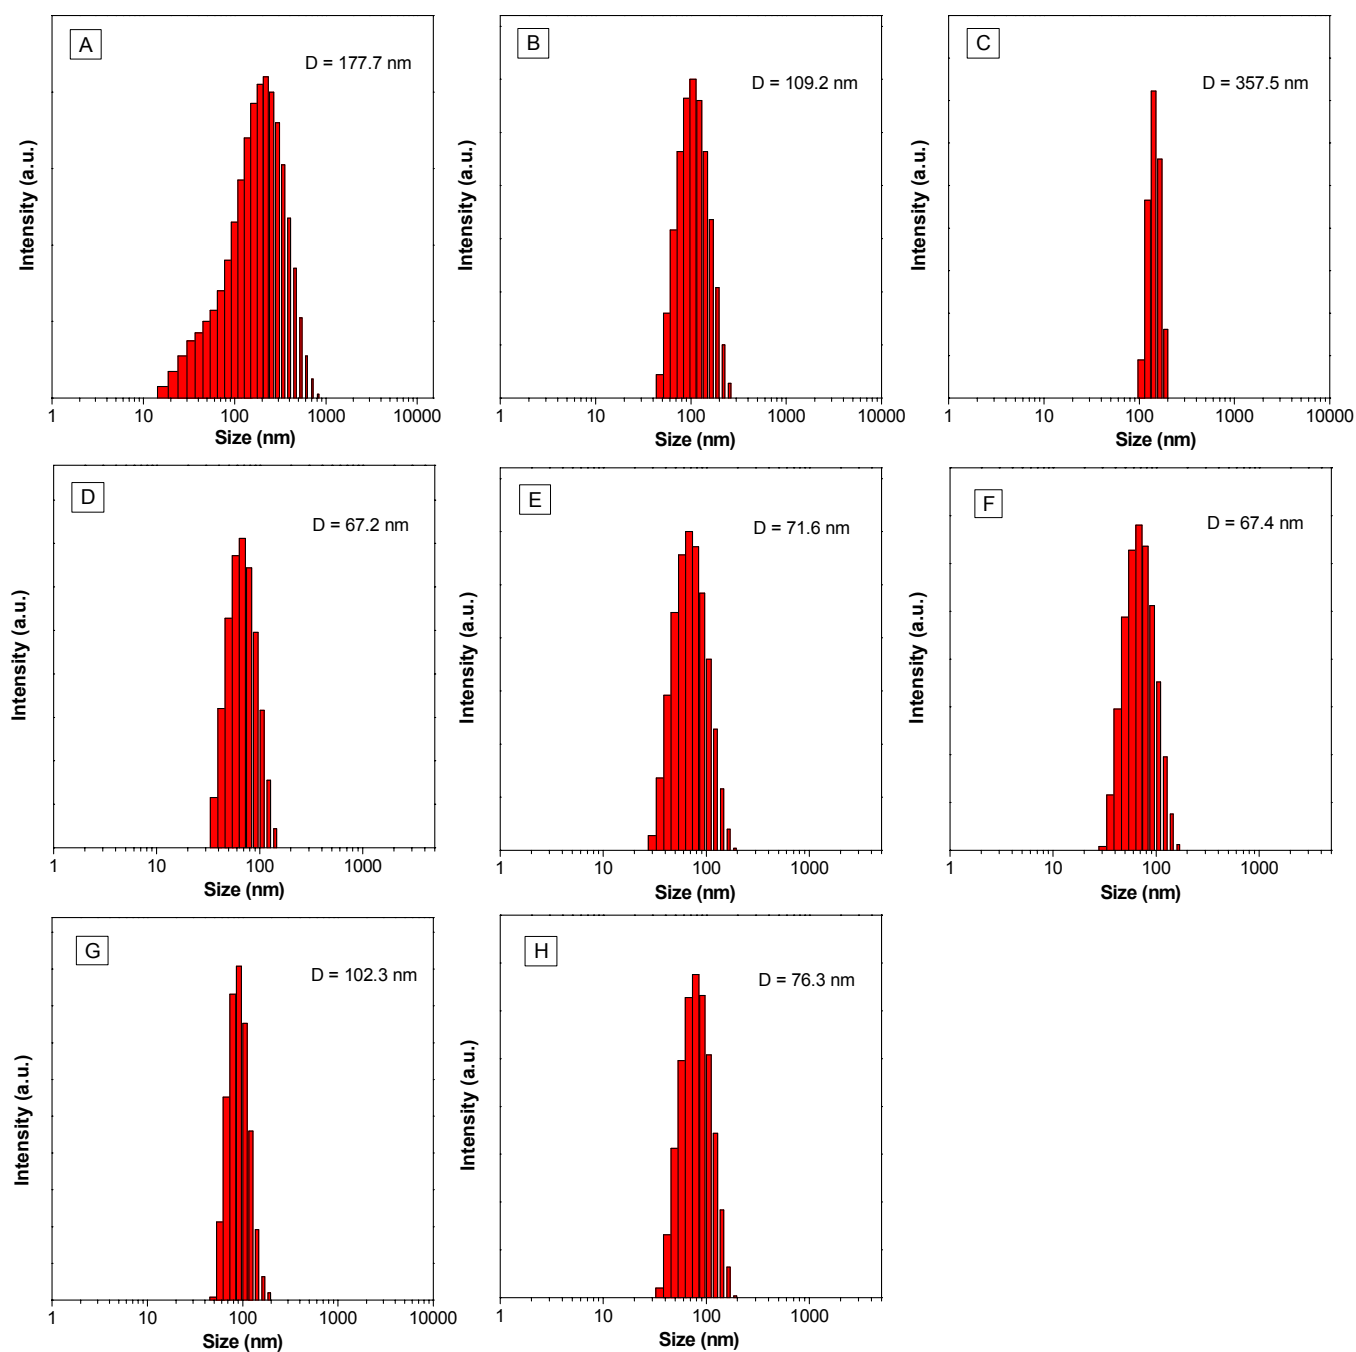

Fig. S8 Particle size distribution of (A) **BINB-1**, (B) **BINB-2**, (C) **BINB-3**, (D) **BINB-4**, (E) **BINB-5**, (F) **BINB-6**, (G) **BINB-7**, (H) **BINB-8** (10  $\mu$ M) in acetonitrile/water (1:99, v/v).

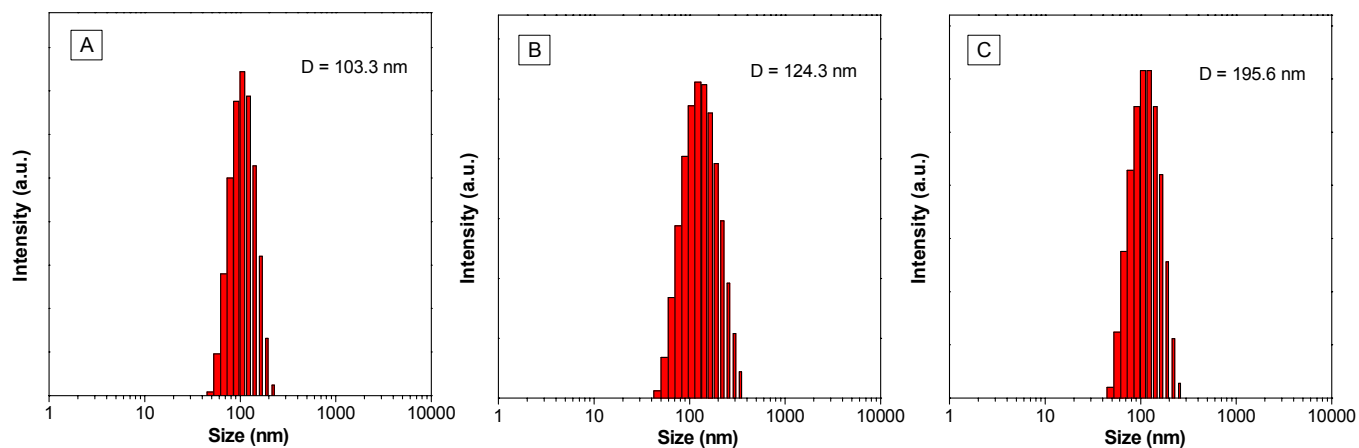

Fig. S9 Particle size distribution of (A) **BINUB-1**, (B) **BINUB-2**, (C) **BINUB-3** (10  $\mu$ M) in acetonitrile/water (1:99, v/v).

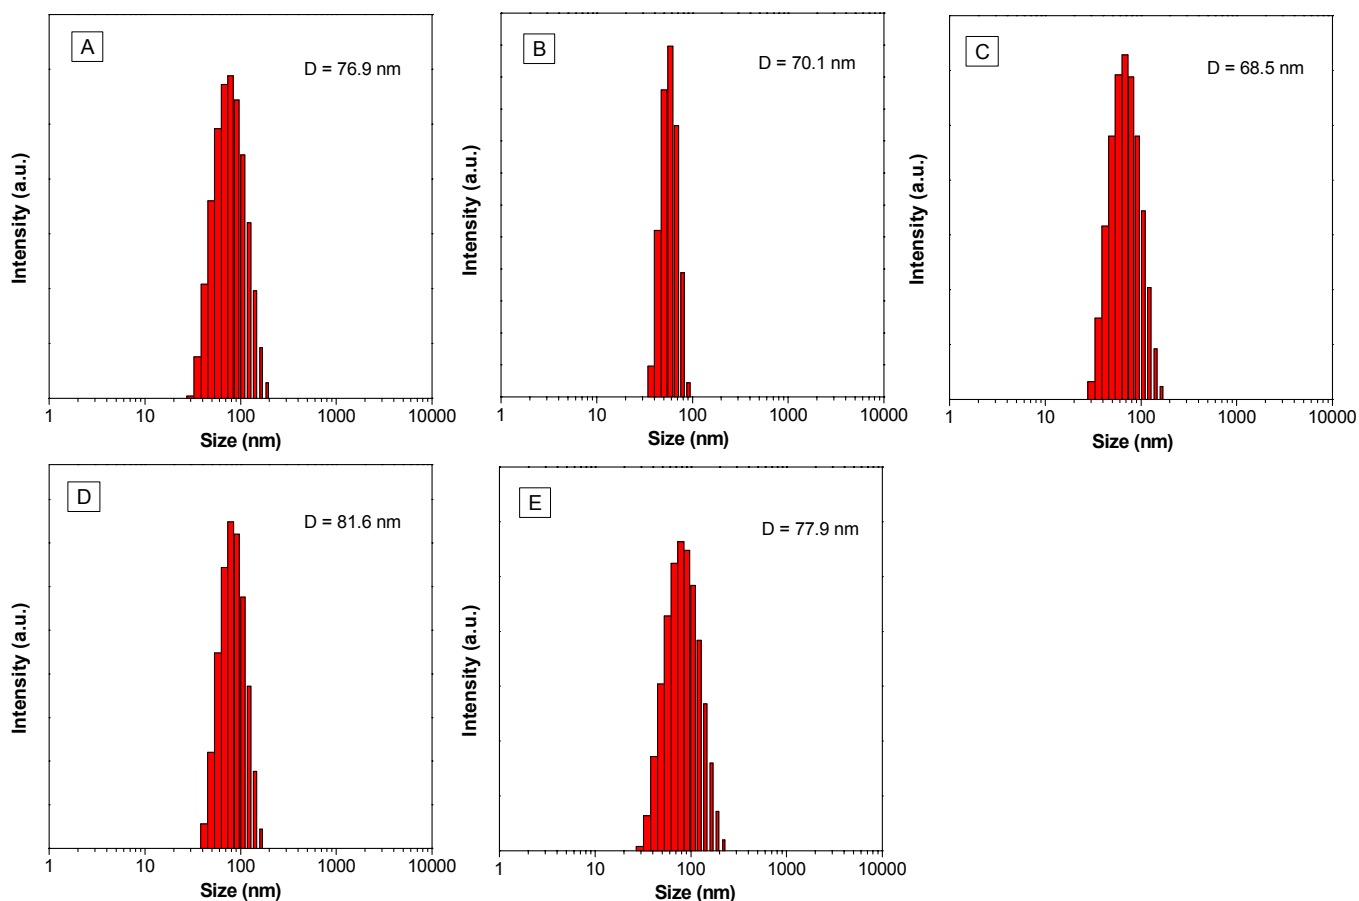

Fig. S10 Particle size distribution of (A) **BINB-6A**, (B) **BINB-6B**, (C) **BINB-6C**, (D) **BINB-6D**, (E) **BINB-6E** (10  $\mu$ M) in acetonitrile/water (1:99, v/v).

## 5.7 Circular dichroism (CD) spectra of target compounds

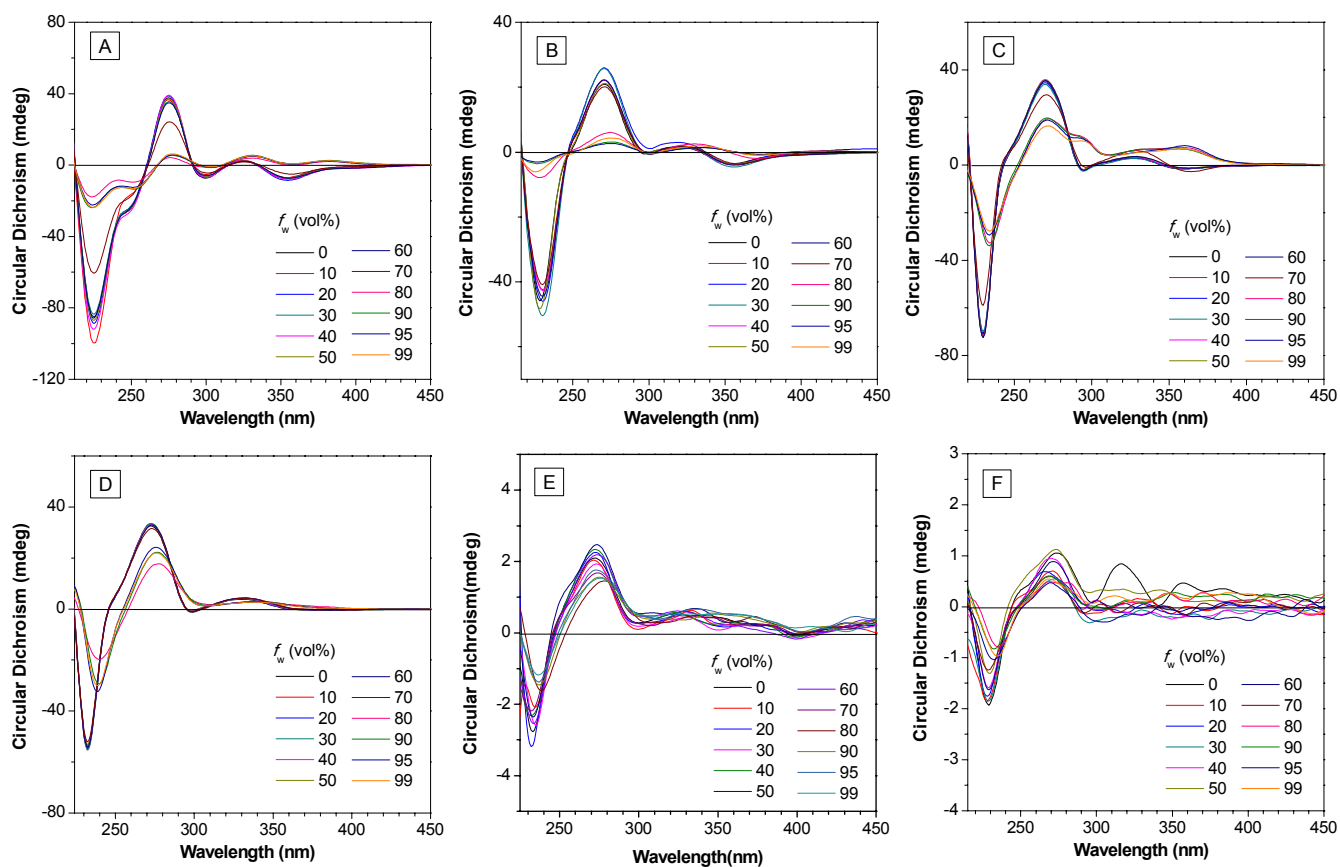

Fig. S11 CD spectra of (A) **BINB-1**, (B) **BINB-3**, (C) **BINB-4**, (D) **BINB-5**, (E) **BINB-7**, (F) **BINB-8** (10  $\mu\text{M}$ ) in acetonitrile/water mixtures with different  $f_w$ .

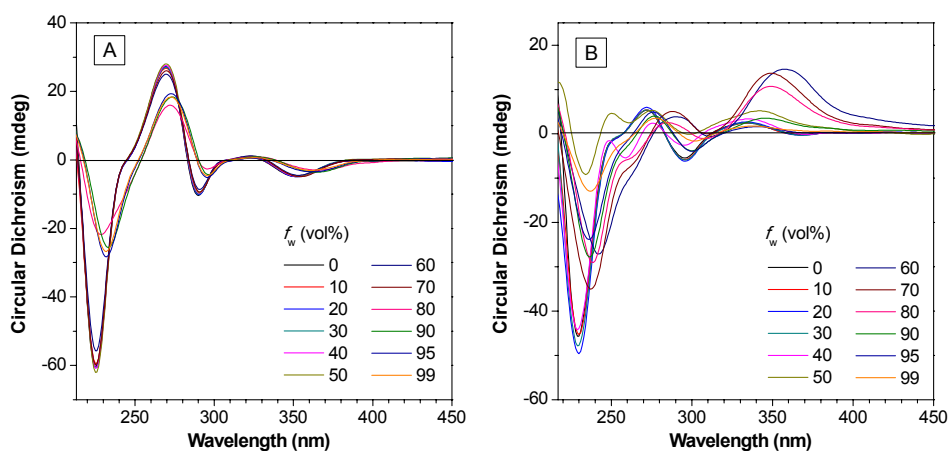

Fig. S12 CD spectra of (A) **BINUB-1**, (B) **BINUB-3** (10  $\mu\text{M}$ ) in acetonitrile/water mixtures with different  $f_w$ .

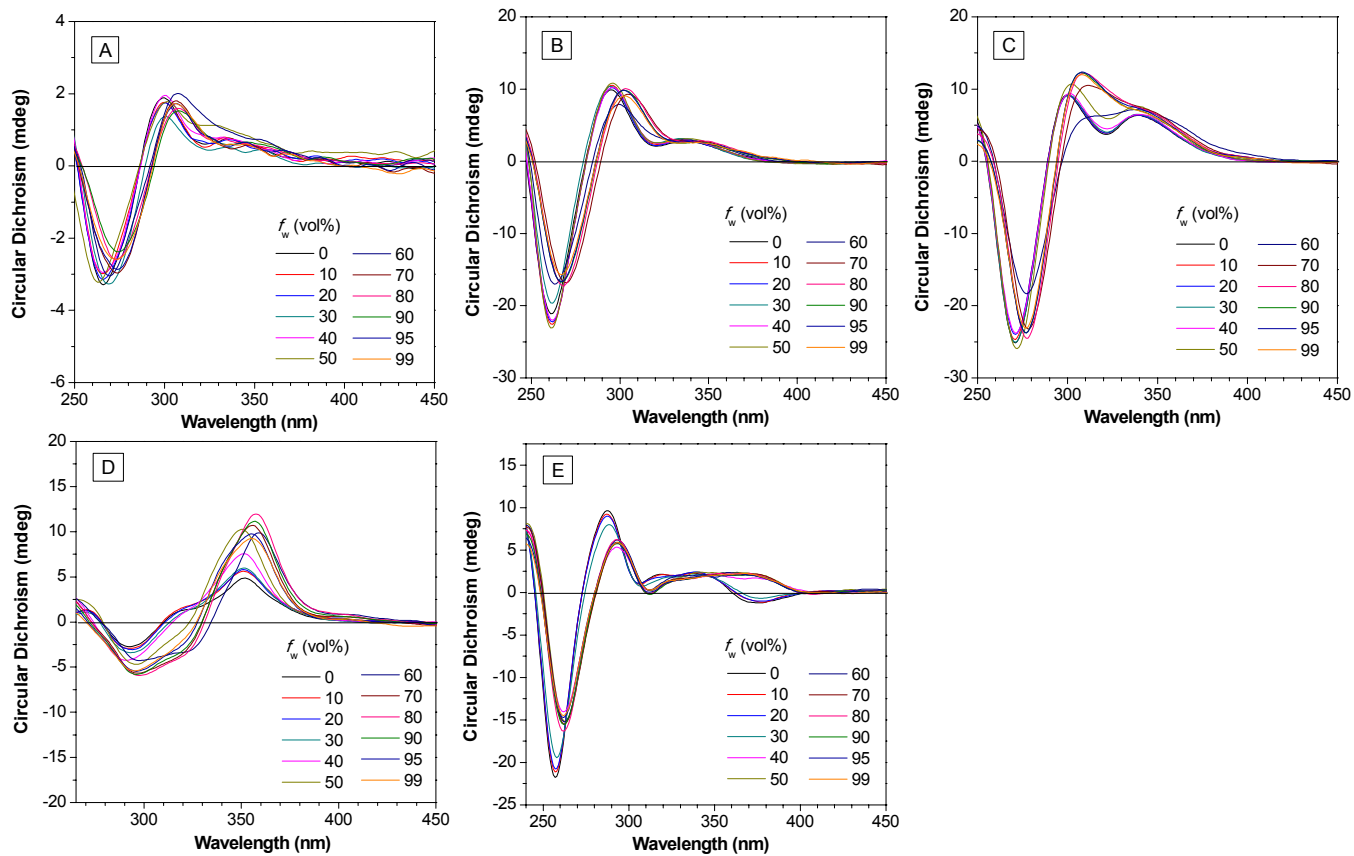

Fig. S13 CD spectra of (A) **BINB-6A**, (B) **BINB-6B**, (C) **BINB-6C**, (D) **BINB-6D**, (E) **BINB-6E** (10  $\mu$ M) in acetonitrile/water mixtures with different  $f_w$ .

## 6. X-ray Single Crystals Data and Their Packing Mode

### 6.1 single crystal data summary

Table S6. Crystallographic data.

| Crystal                                    | BINB-1                                                                              | BINB-2                                                                              | BINB-4                                                                               | BINB-5                                                                                |
|--------------------------------------------|-------------------------------------------------------------------------------------|-------------------------------------------------------------------------------------|--------------------------------------------------------------------------------------|---------------------------------------------------------------------------------------|
| formula                                    | C <sub>29</sub> H <sub>14</sub> N <sub>4</sub> O <sub>2</sub>                       | C <sub>30</sub> H <sub>16</sub> N <sub>4</sub> O <sub>2</sub>                       | C <sub>32</sub> H <sub>20</sub> N <sub>4</sub> O <sub>2</sub>                        | C <sub>33</sub> H <sub>22</sub> N <sub>4</sub> O <sub>2</sub>                         |
| crystal system                             | monoclinic                                                                          | monoclinic                                                                          | monoclinic                                                                           | orthorhombic                                                                          |
| space group                                | P 2 (1)                                                                             | C 2                                                                                 | P 2 (1)                                                                              | C 222 (1)                                                                             |
| <i>a</i> [Å]                               | 5.0052 (2)                                                                          | 25.4902 (8)                                                                         | 7.9714 (4)                                                                           | 12.0721 (6)                                                                           |
| <i>b</i> [Å]                               | 15.6076 (4)                                                                         | 8.4676 (3)                                                                          | 22.5703 (8)                                                                          | 17.9566 (12)                                                                          |
| <i>c</i> [Å]                               | 14.6006 (4)                                                                         | 16.9657 (5)                                                                         | 9.1047 (4)                                                                           | 12.2305 (6)                                                                           |
| $\beta$ [deg]                              | 91.275 (3)                                                                          | 104.889 (2)                                                                         | 115.426 (7)                                                                          | 90.00                                                                                 |
| <i>V</i> [Å <sup>3</sup> ]                 | 1140.30 (6)                                                                         | 3538.9 (2)                                                                          | 1479.42 (11)                                                                         | 2651.3 (3)                                                                            |
| <i>Z</i>                                   | 2                                                                                   | 6                                                                                   | 2                                                                                    | 4                                                                                     |
| $\mu$ [mm <sup>-1</sup> ]                  | 0.687                                                                               | 0.679                                                                               | 2.266                                                                                | 0.646                                                                                 |
| <i>T</i> [K]                               | 293                                                                                 | 293                                                                                 | 293                                                                                  | 293                                                                                   |
| $\theta_{\min}$ - $\theta_{\max}$<br>[deg] | 5.6610-71.6150                                                                      | 3.5770-71.7750                                                                      | 5.3690-71.5160                                                                       | 4.3920-71.5610                                                                        |
| R                                          | 0.0332                                                                              | 0.0315                                                                              | 0.0561                                                                               | 0.0396                                                                                |
| w <i>R</i> <sub>2</sub>                    | 0.0919                                                                              | 0.0887                                                                              | 0.1700                                                                               | 0.1069                                                                                |
| GOOF                                       | 1.030                                                                               | 1.038                                                                               | 1.061                                                                                | 1.054                                                                                 |
| crystal pictures <sup>a</sup>              | 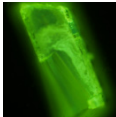 |  |  |  |
| CCDC number                                | 1823469                                                                             | 1823470                                                                             | 1823471                                                                              | 1823472                                                                               |
|                                            | <a href="#">Compounds chart</a>                                                     | <a href="#">Compounds chart</a>                                                     | <a href="#">Compounds chart</a>                                                      | <a href="#">Compounds chart</a>                                                       |
|                                            | <a href="#">Data</a>                                                                | <a href="#">Data</a>                                                                | <a href="#">Data</a>                                                                 | <a href="#">Data</a>                                                                  |
|                                            | <a href="#">NMR</a>                                                                 | <a href="#">NMR</a>                                                                 | <a href="#">NMR</a>                                                                  | <a href="#">NMR</a>                                                                   |

<sup>a</sup>The fluorescent pictures of corresponding single crystals were taken by Olympus DP-80 fluorescence microscopy under UV irradiation.

Table S7. Crystallographic data.

| <b>Crystal</b>                          | <b>BINB-6A</b>                                                                    | <b>BINB-7</b>                                                                      | <b>BINB-8</b>                                                                       |
|-----------------------------------------|-----------------------------------------------------------------------------------|------------------------------------------------------------------------------------|-------------------------------------------------------------------------------------|
| formula                                 | C <sub>48</sub> H <sub>30</sub> F <sub>6</sub> N <sub>4</sub> O <sub>2</sub>      | C <sub>35</sub> H <sub>26</sub> N <sub>4</sub> O <sub>2</sub>                      | C <sub>36</sub> H <sub>28</sub> N <sub>4</sub> O <sub>2</sub>                       |
| crystal system                          | orthorhombic                                                                      | monoclinic                                                                         | triclinic                                                                           |
| space group                             | C222 (1)                                                                          | P 21/c                                                                             | P 1                                                                                 |
| <i>a</i> [Å]                            | 18.4373 (19)                                                                      | 8.5584 (3)                                                                         | 8.8302 (3)                                                                          |
| <i>b</i> [Å]                            | 25.7446 (19)                                                                      | 18.7684 (5)                                                                        | 18.7601 (8)                                                                         |
| <i>c</i> [Å]                            | 11.6266 (7)                                                                       | 17.4034 (4)                                                                        | 19.0270 (7)                                                                         |
| $\beta$ [deg]                           | 90.00                                                                             | 94.951 (3)                                                                         | 94.387 (3)                                                                          |
| <i>V</i> [Å <sup>3</sup> ]              | 5518.7 (8)                                                                        | 2785.04 (13)                                                                       | 2926.02 (19)                                                                        |
| <i>Z</i>                                | 4                                                                                 | 12                                                                                 | 4                                                                                   |
| $\mu$ [mm <sup>-1</sup> ]               | 0.625                                                                             | 0.641                                                                              | 0.623                                                                               |
| <i>T</i> [K]                            | 153                                                                               | 293                                                                                | 293                                                                                 |
| $\theta_{\min}$ - $\theta_{\max}$ [deg] | 2.95-62.11                                                                        | 0.809-0.825                                                                        | 4.1350-69.2690                                                                      |
| <i>R</i>                                | 0.0854                                                                            | 0.0467                                                                             | 0.0585                                                                              |
| w <i>R</i> <sub>2</sub>                 | 0.2375                                                                            | 0.1369                                                                             | 0.1822                                                                              |
| GOOF                                    | 1.103                                                                             | 1.033                                                                              | 1.070                                                                               |
| crystal pictures <sup>a</sup>           | 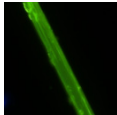 |  |  |
| CCDC number                             | 1823473                                                                           | 1856064                                                                            | 1823474                                                                             |
|                                         | <a href="#">Compounds chart</a>                                                   | <a href="#">Compounds chart</a>                                                    | <a href="#">Compounds chart</a>                                                     |
|                                         | <a href="#">Data</a>                                                              | <a href="#">Data</a>                                                               | <a href="#">Data</a>                                                                |
|                                         | <a href="#">NMR</a>                                                               | <a href="#">NMR</a>                                                                | <a href="#">NMR</a>                                                                 |

<sup>a</sup>The fluorescent pictures of corresponding single crystals were taken by Olympus DP-80 fluorescence microscopy under UV irradiation.



## 6.2 X-ray single crystallographic packing of the corresponding compounds

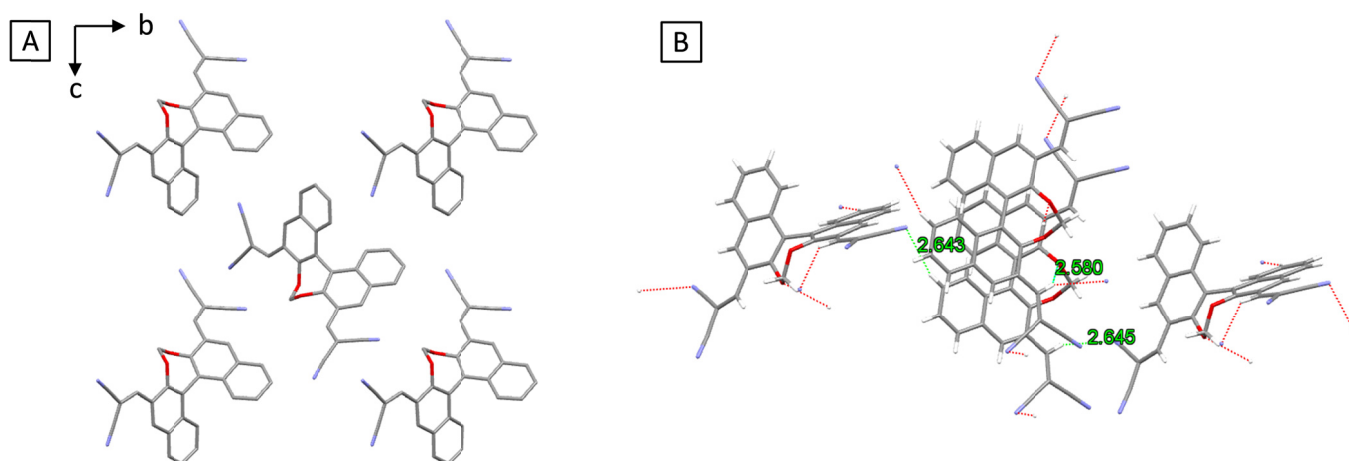

Fig. S14 Crystal packing mode (A) as well as short contacts (B) of **BINB-1**. Carbon, hydrogen, and nitrogen atoms are shown in gray, white, and blue, respectively.

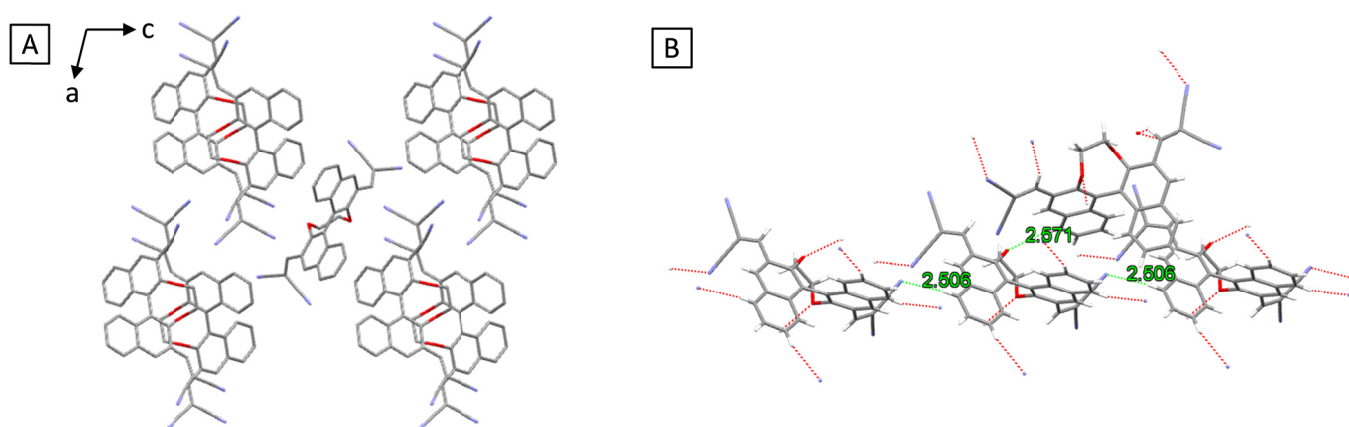

Fig. S15 Crystal packing mode (A) as well as short contacts (B) of **BINB-2**. Carbon, hydrogen, and nitrogen atoms are shown in gray, white, and blue, respectively.

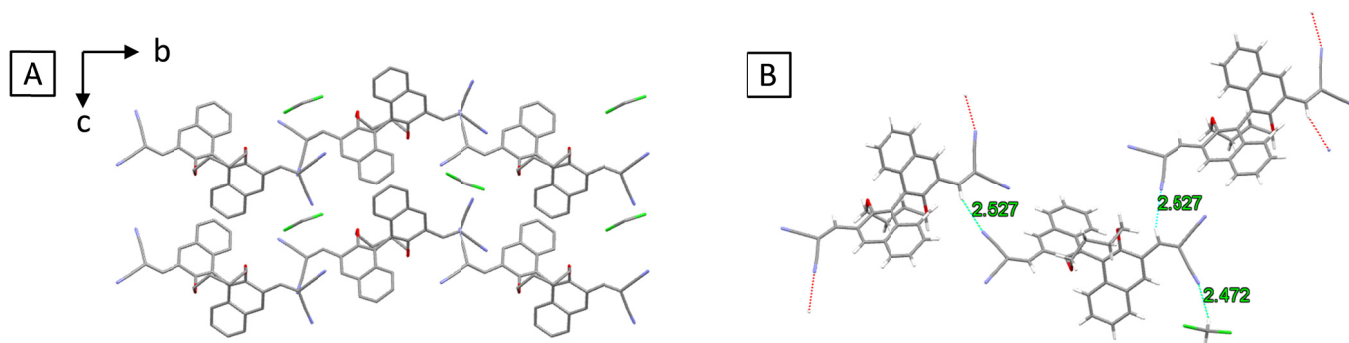

Fig. S16 Crystal packing mode (A) as well as short contacts (B) of **BINB-4**. Carbon, hydrogen, and nitrogen atoms are shown in gray, white, and blue, respectively.

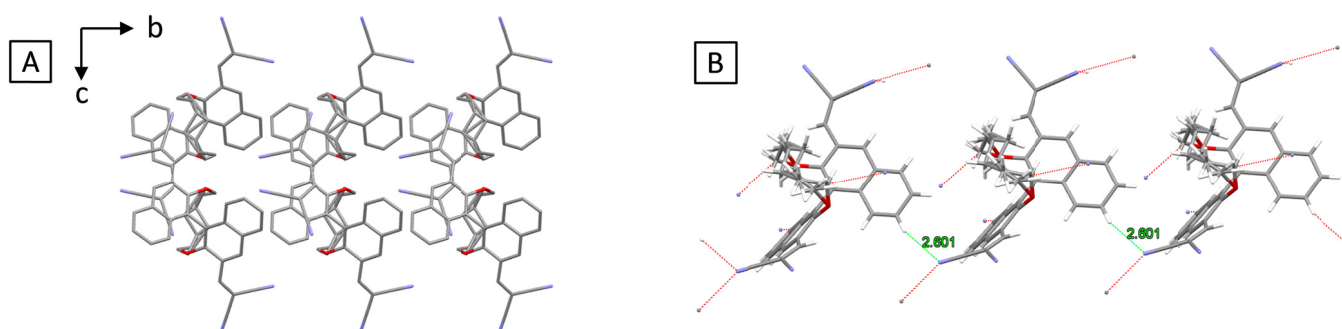

Fig. S17 Crystal packing mode (A) as well as short contacts (B) of **BINB-5**. Carbon, hydrogen, and nitrogen atoms are shown in gray, white, and blue, respectively.

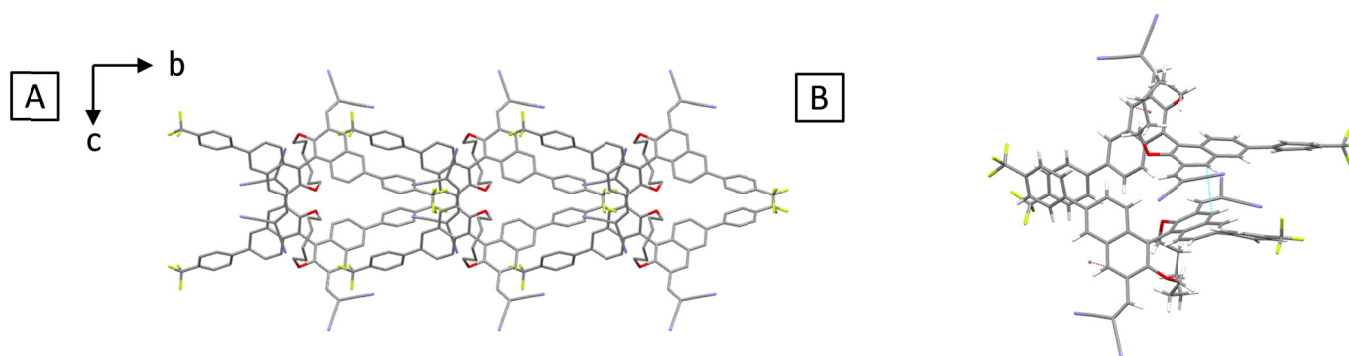

Fig. S18 Crystal packing mode (A) as well as short contacts (B) of **BINB-6A**. Carbon, hydrogen, and nitrogen atoms are shown in gray, white, and blue, respectively.

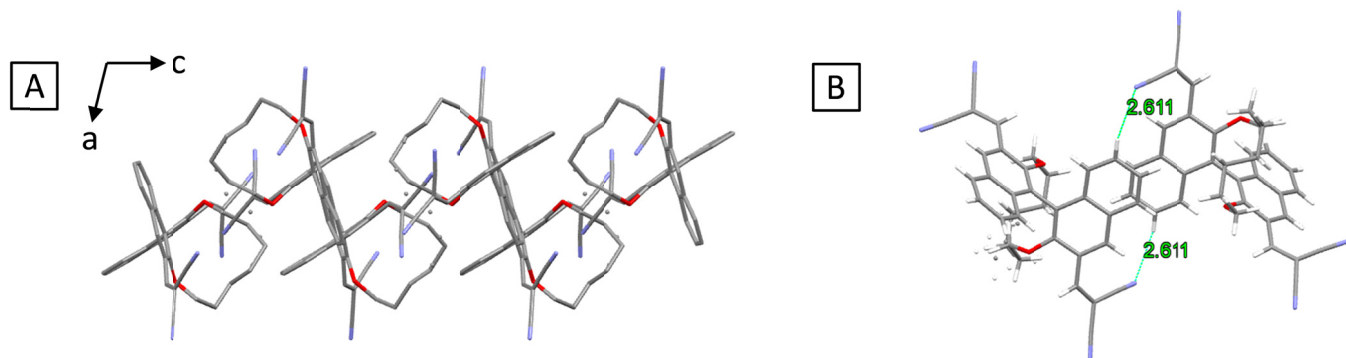

Fig. S19 Crystal packing mode (A) as well as short contacts (B) of **BINB-7**. Carbon, hydrogen, and nitrogen atoms are shown in gray, white, and blue, respectively.

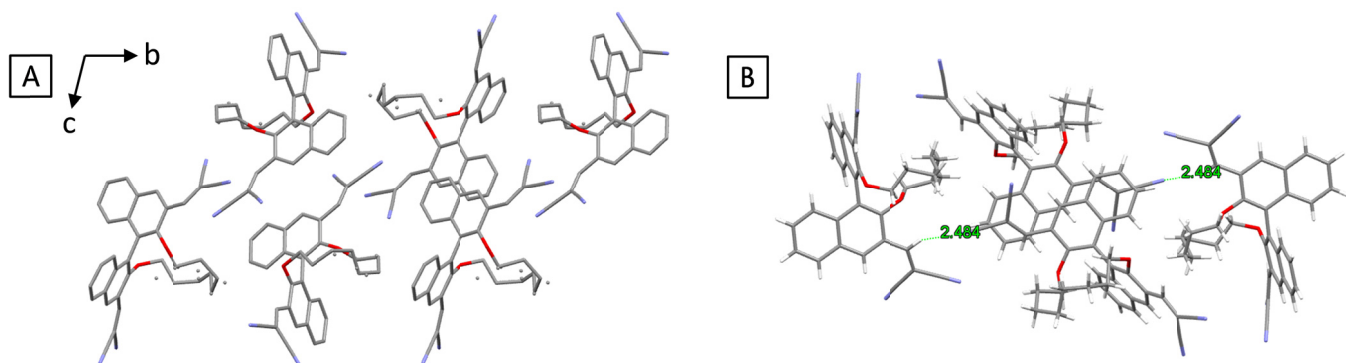

Fig. S20 Crystal packing mode (A) as well as short contacts (B) of **BINB-8**. Carbon, hydrogen, and nitrogen atoms are shown in gray, white, and blue, respectively.

## 7. Molecular dynamics simulations.

To obtain the torsion angles distribution, we performed molecular dynamics (MD) simulations for **BINB-2** and **BINB-6** by using GROMACS software package (version 5.1).<sup>1</sup> We first performed the geometry optimization and then carried out the electrostatic potential for each molecule by  $\omega$ b97xd/6-31G\*\* method using Gaussian 09 package.<sup>2</sup> The partial charges of the atoms reproducing the electrostatic potential were obtained by using restrained electrostatic potential (RESP) fit method.<sup>3,4</sup> The atom types and parameters of the two molecules were built from the general amber force field (GAFF).<sup>5</sup> We set up model by placing each molecule into the center of a cubic box and then solvated by the pre-equilibrated TIP3P water molecules.<sup>6</sup> For **BINB-2** and **BINB-6**, the length of box was both 4 nm, containing 2145 and 2204 water molecules respectively.

For each molecule, we first performed the energy minimization by using steepest descent algorithm. And then we performed the 500 ps MD simulations under the NVT (P = 1 bar, T = 300 K) ensemble. The temperature was controlled by the velocity rescaling thermostat.<sup>7</sup> Then we performed the 50 ns MD simulations under the NPT (P = 1 bar, T = 300 K) ensemble coupled by Parrinello-Rahman barostat.<sup>8</sup> The Newton's classical equations of motion were integrated at a time step of 2 fs using the classical leapfrog algorithm. For each molecule, we ran two independent 50 ns MD trajectories and we chose conformations in the last 40 ns for torsion angles analysis. The torsion angles of **BINB-2** and **BINB-6** were distributed around 71 degree and 111 degree respectively.

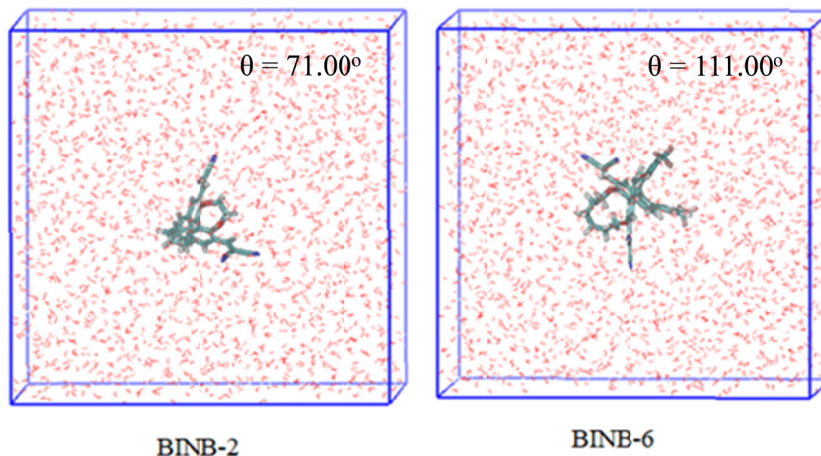

Fig. S21 The snapshots of the final equilibrated BINB-2 and BINB-6 in aqueous solution and their torsion angles distribution.

## References

- (1) M. J. Abraham, D. van der Spoel, E. Lindahl, B. Hess and the GROMACS development team, GROMACS User Manual version 5.1, 2015.
- (2) M. J. Frisch, G. W. Trucks, H. B. Schlegel, G. E. Scuseria, M. A. Robb, J. R. Cheeseman, G. Scalmani, V. Barone, B. Mennucci, G. A. Petersson, et al. Gaussian 09, Revision A.02, Gaussian, Inc., Wallingford, CT, 2009.
- (3) C. I. Bayly, P. Cieplak, W. Cornell and P. A. Kollman, *J. Phys. Chem.*, 1993, **97**, 10269–10280.
- (4) W. D. Cornell, P. Cieplak, C. I. Bayly and P. A. Kollman, *J. Am. Chem. Soc.*, 1993, **115**, 9620–9631.
- (5) J. Wang, R. M. Wolf, J. W. Caldwell, P. A. Kollman and D. A. J. Case, *Comput. Chem.*, 2004, **25**, 1157–1174.
- (6) W. L. Jorgensen, J. Chandrasekhar, J. D. Madura, R. W. Impey and M. L. J. Klein, *Chem. Phys.*, 1983, **79**, 926–935.
- (7) G. Bussi, D. Donadio and M. Parrinello, *J. Chem. Phys.*, 2007, **126**, 014101.
- (8) M. Parrinello and A. Rahman, *J. Appl. Phys.*, 1981, **52**, 7182–7190.

## 8. NMR Spectra

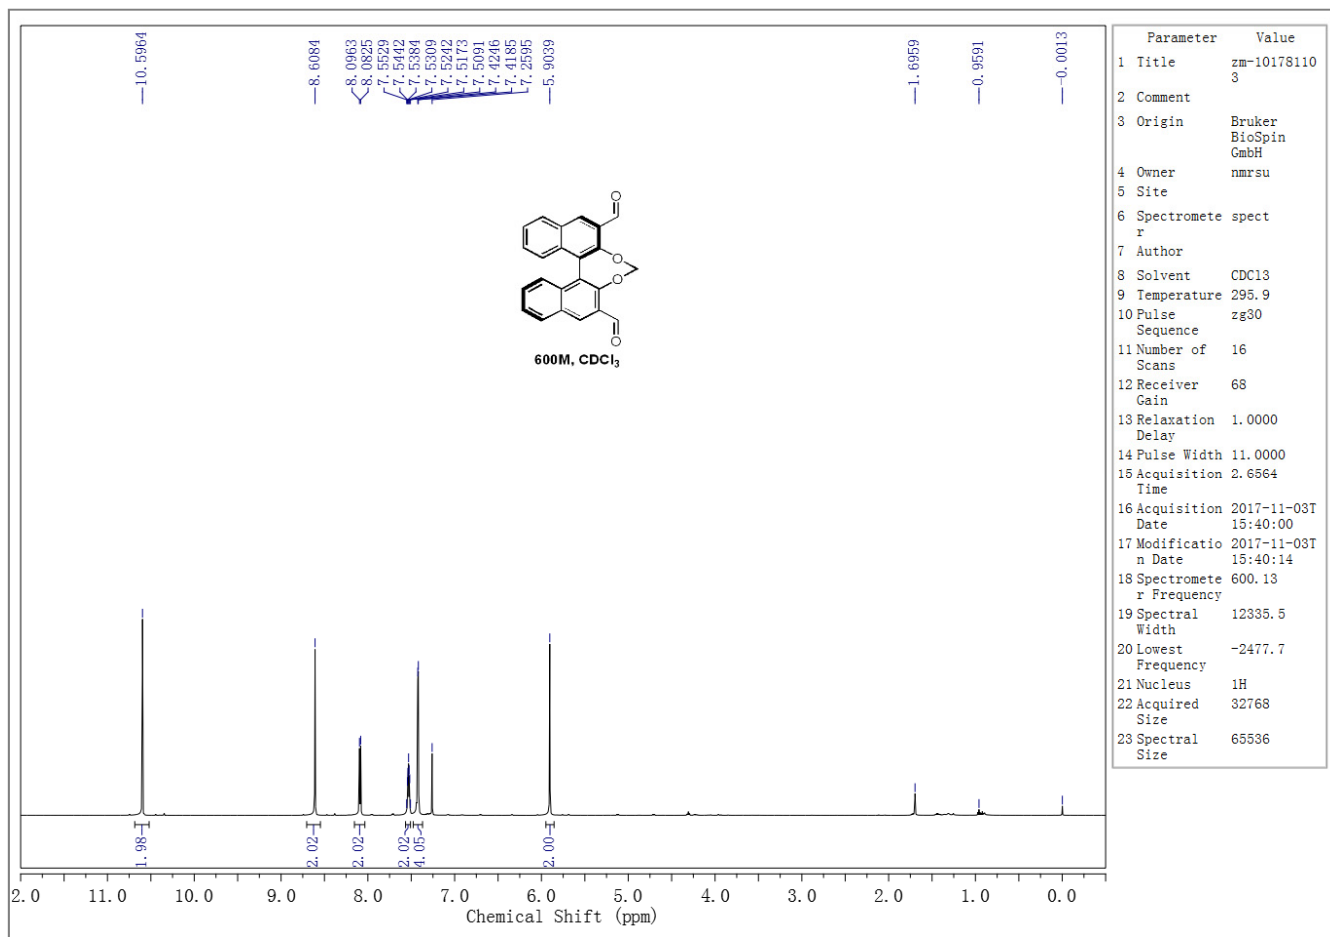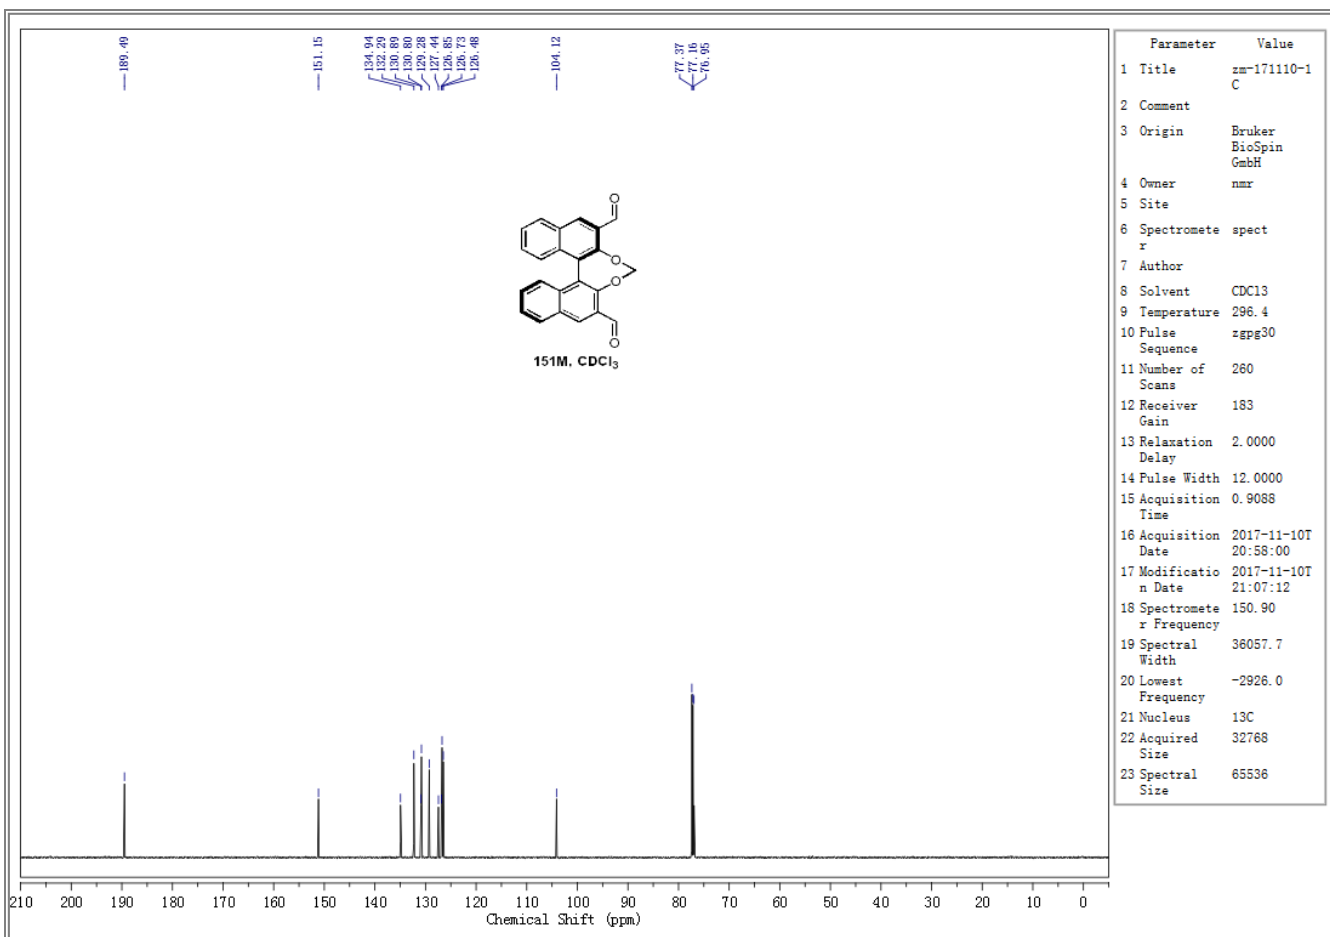

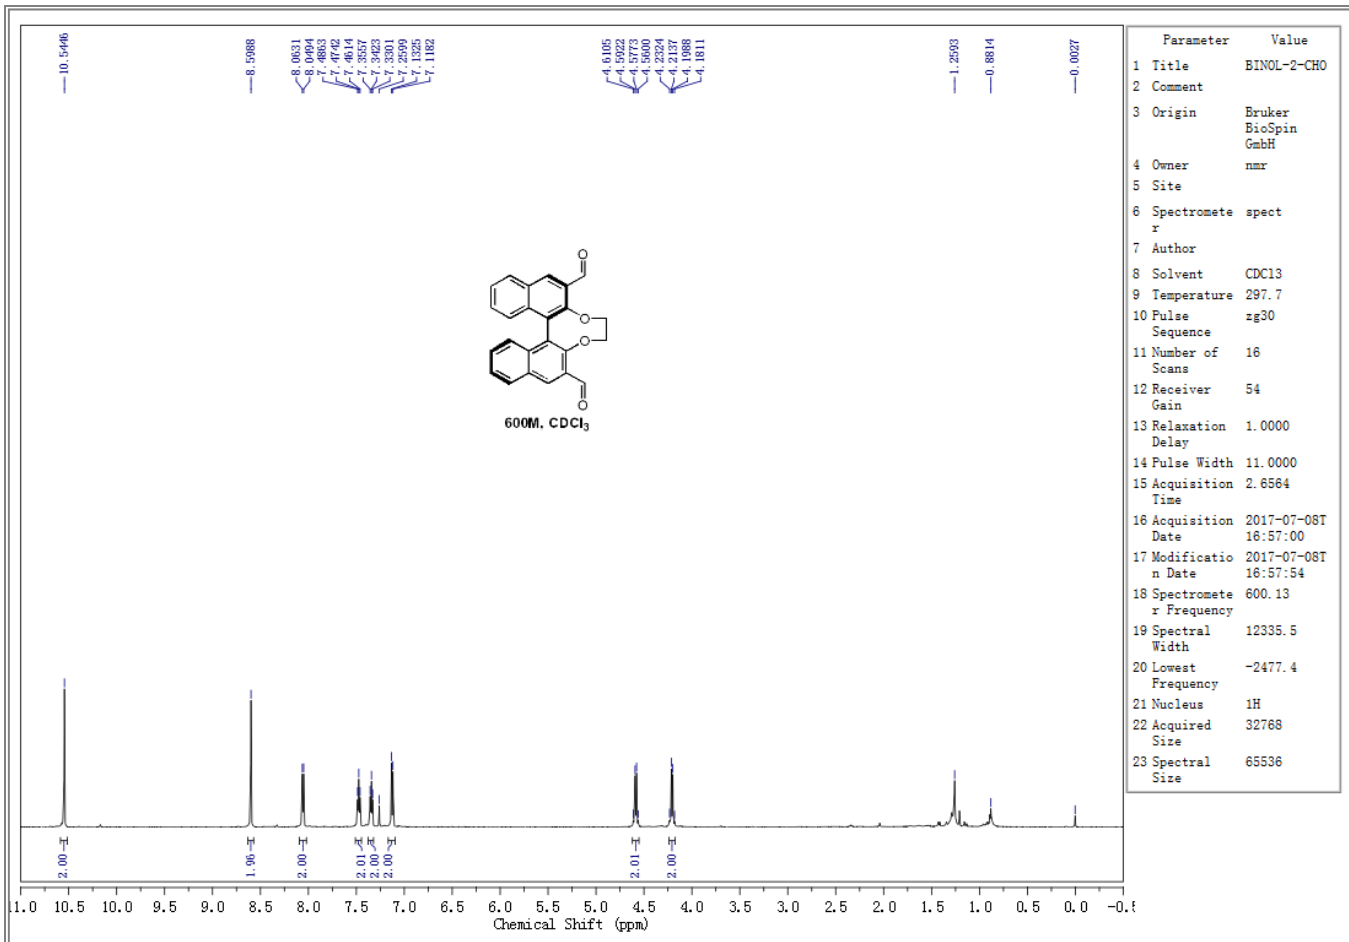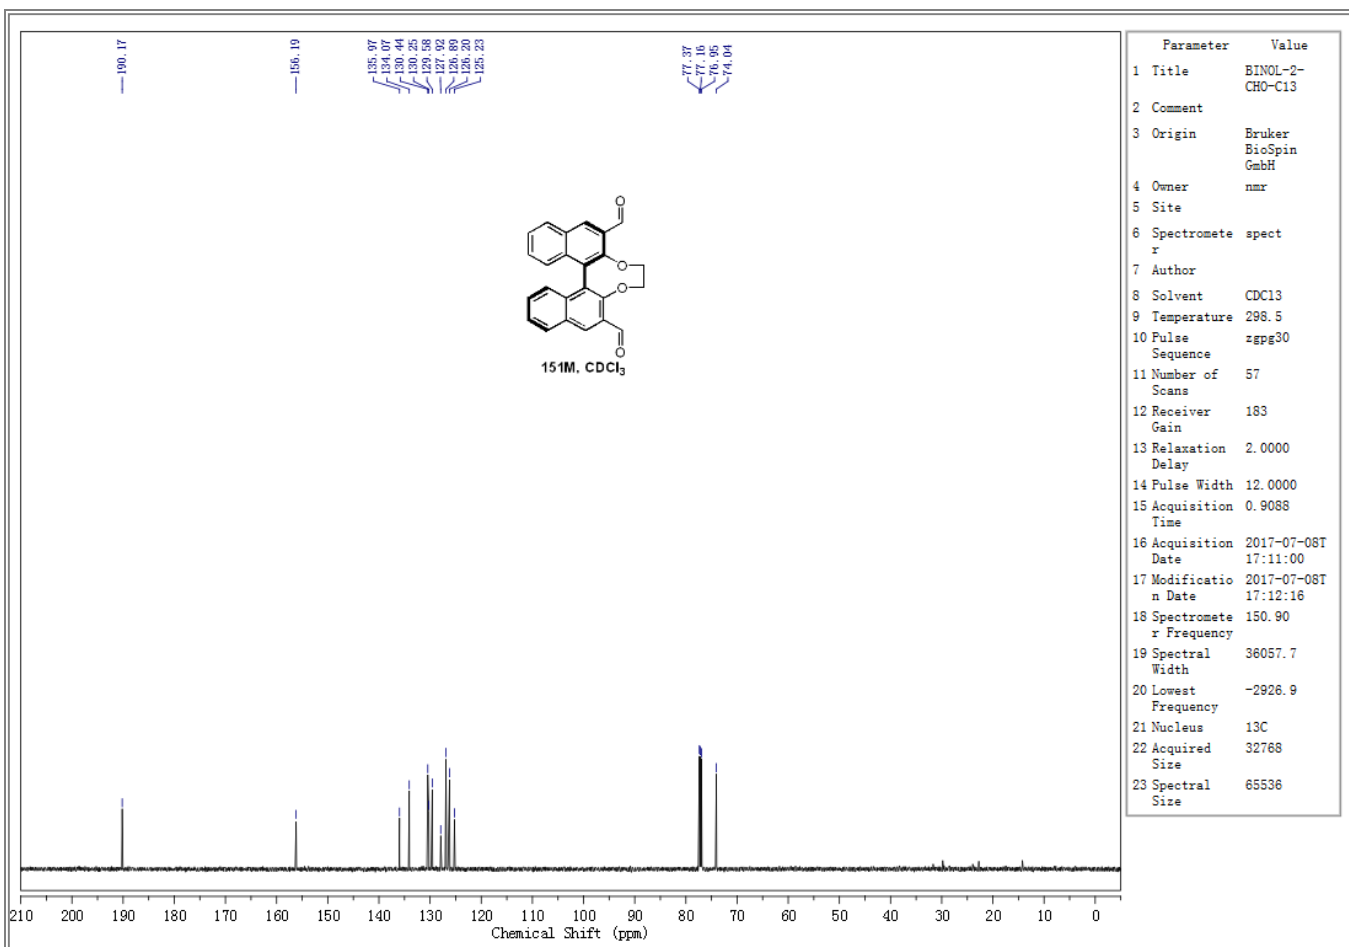

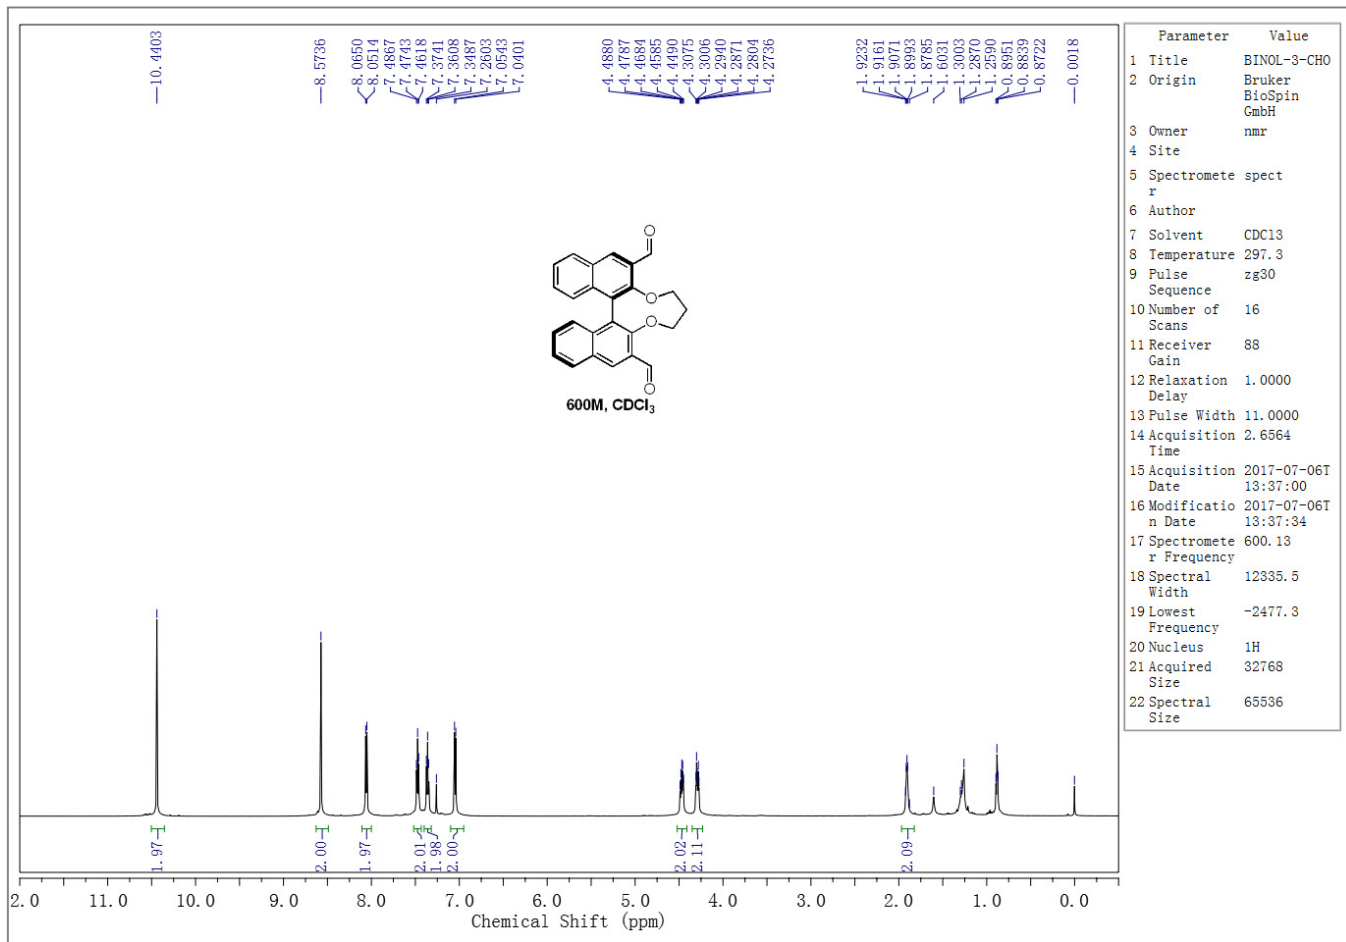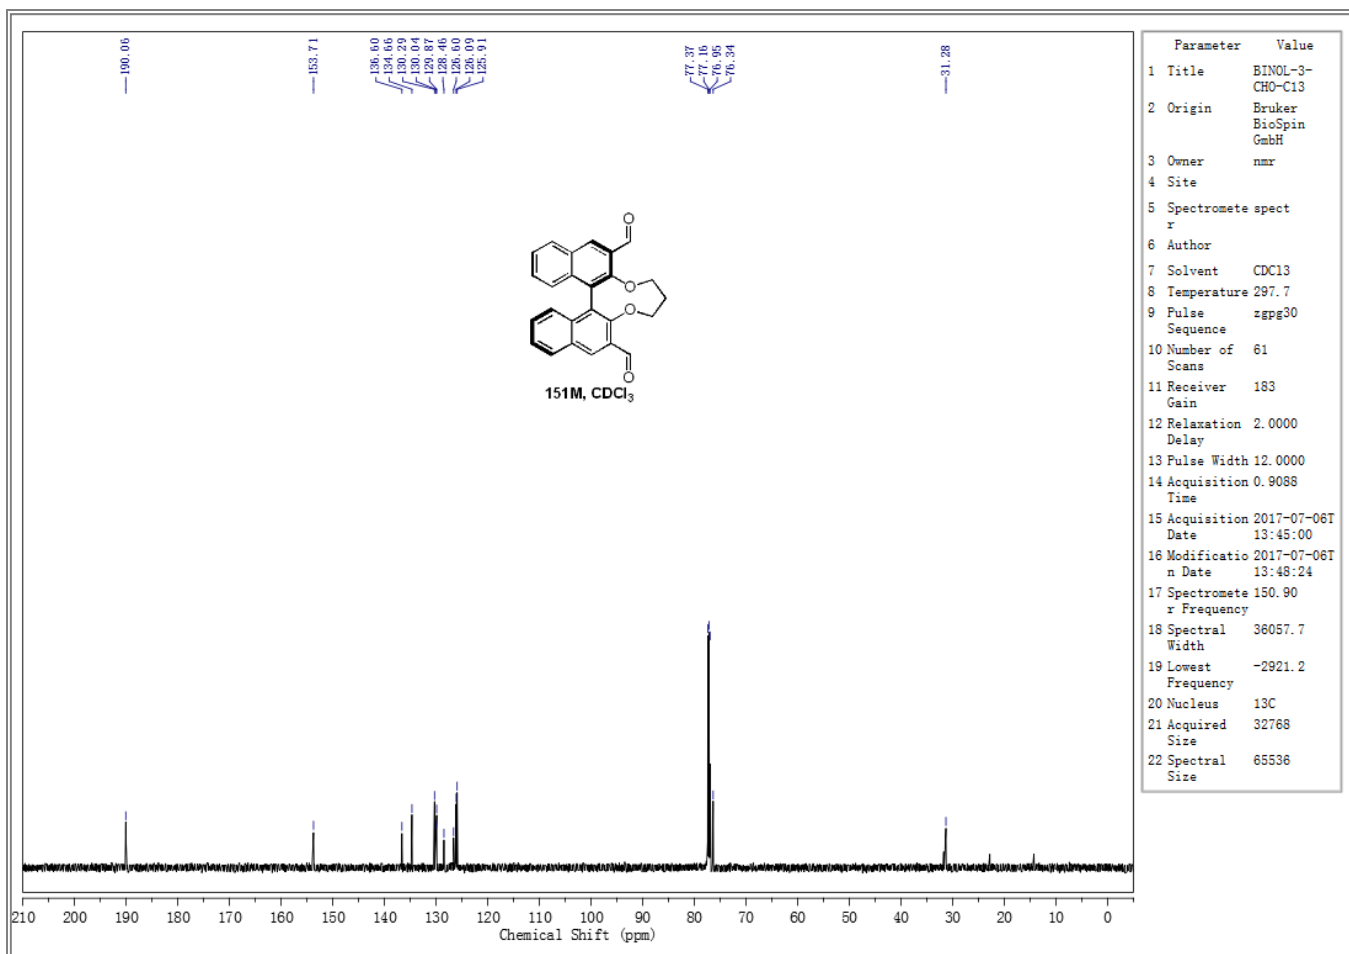



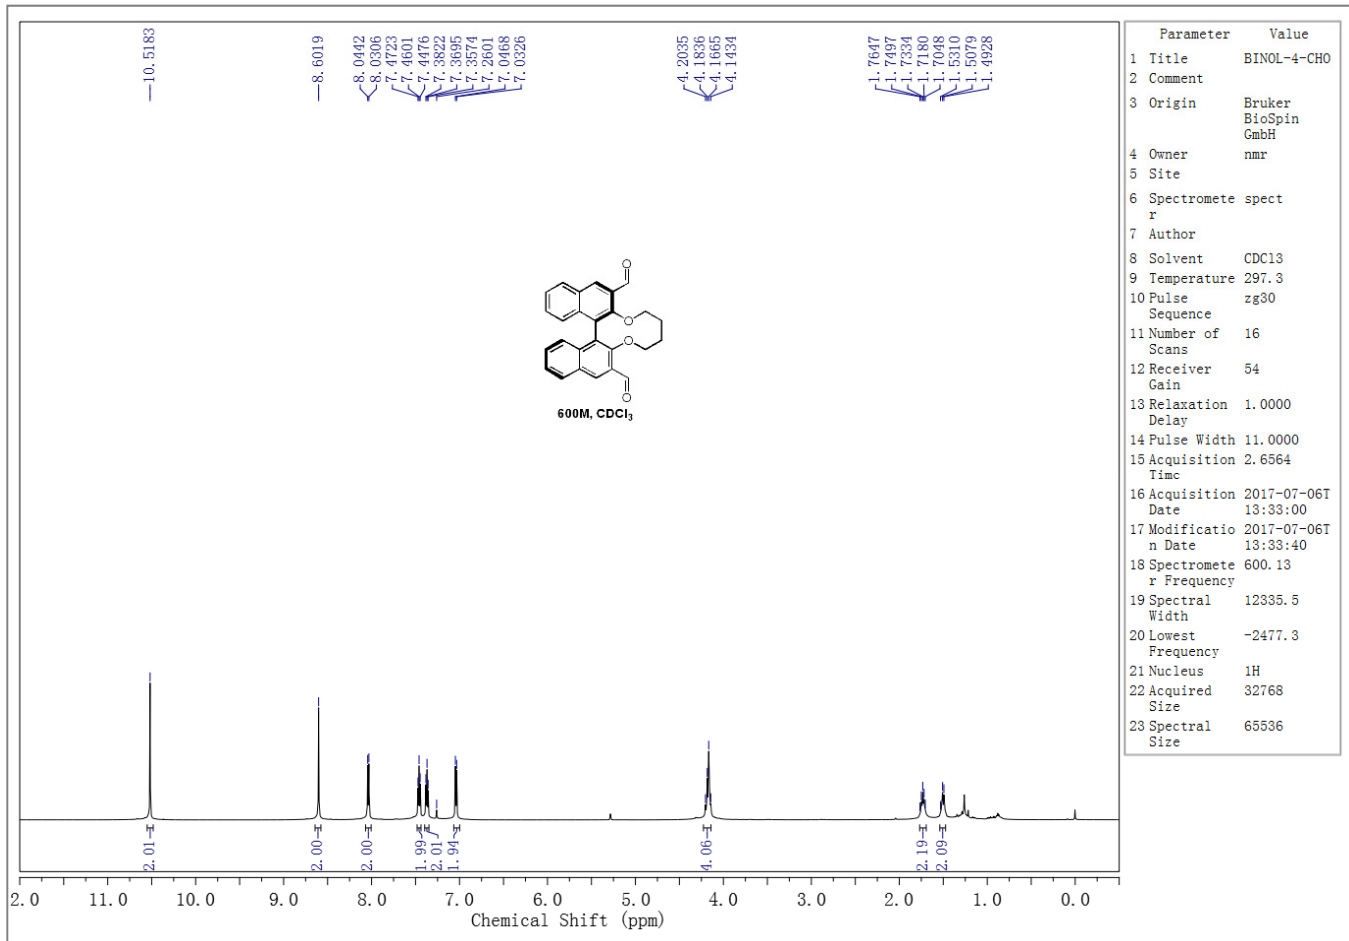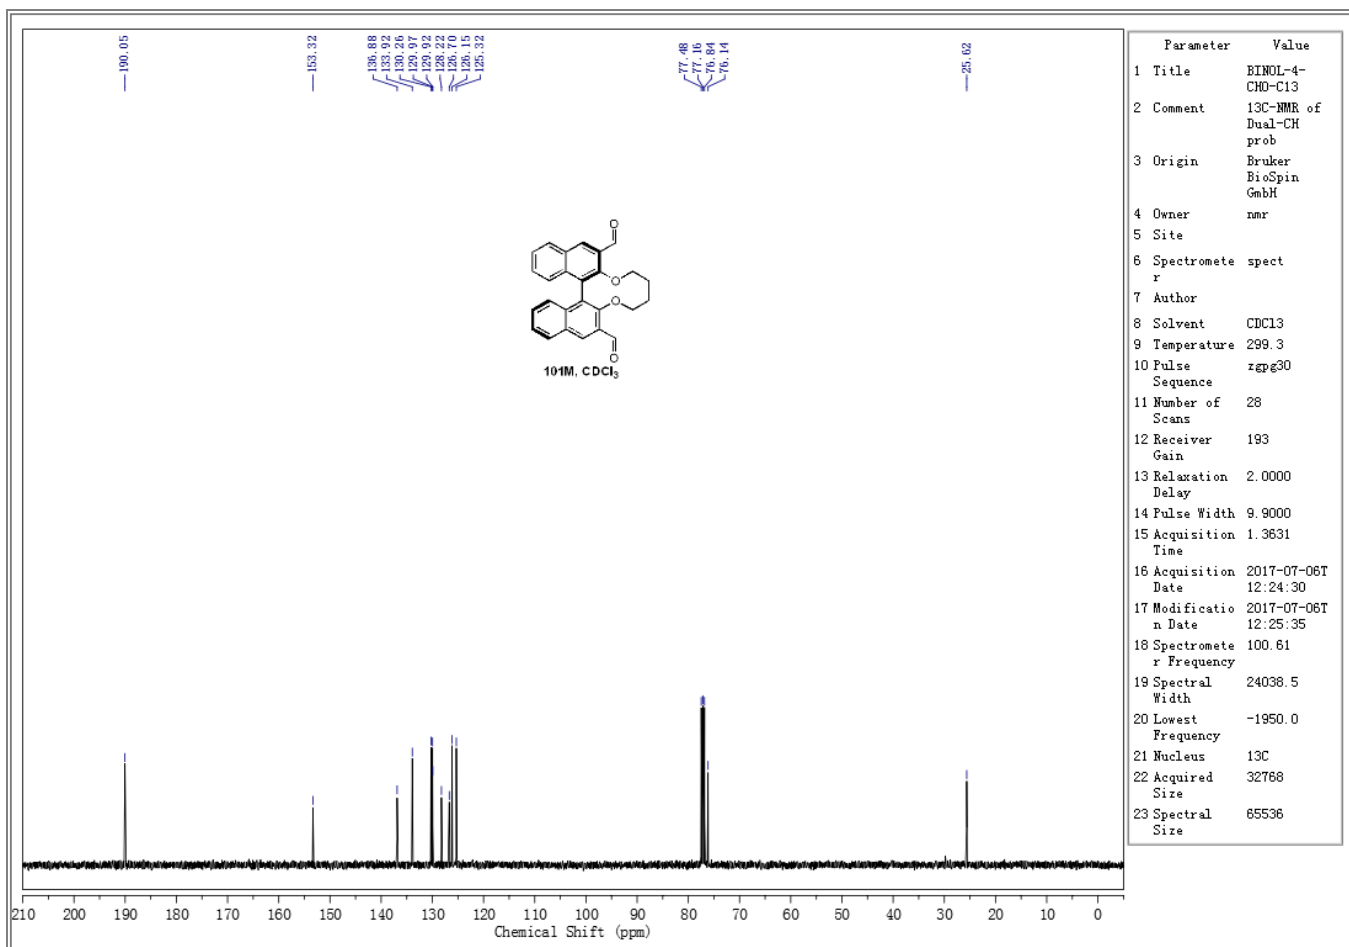

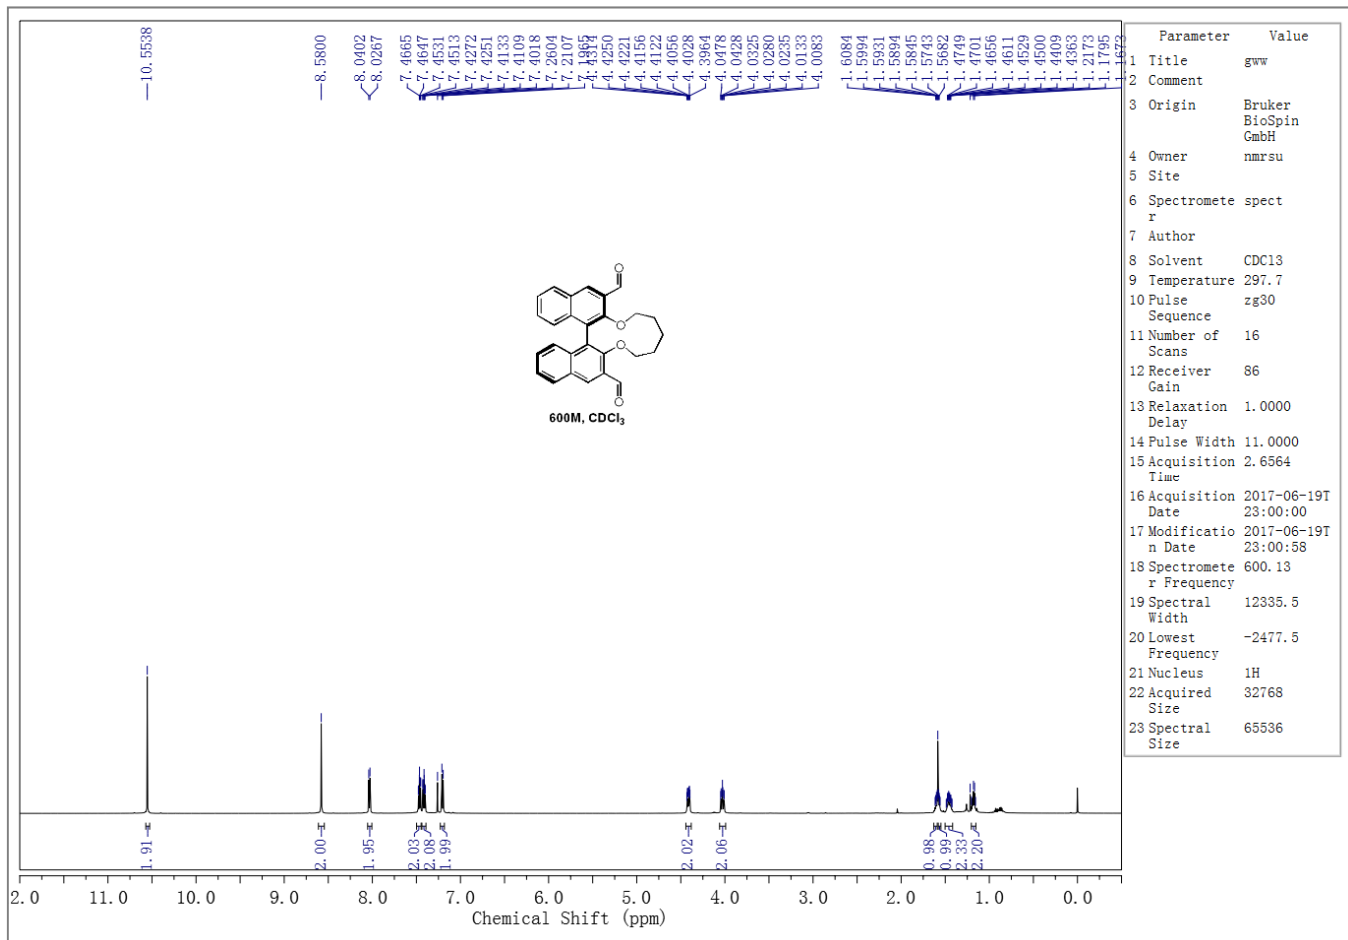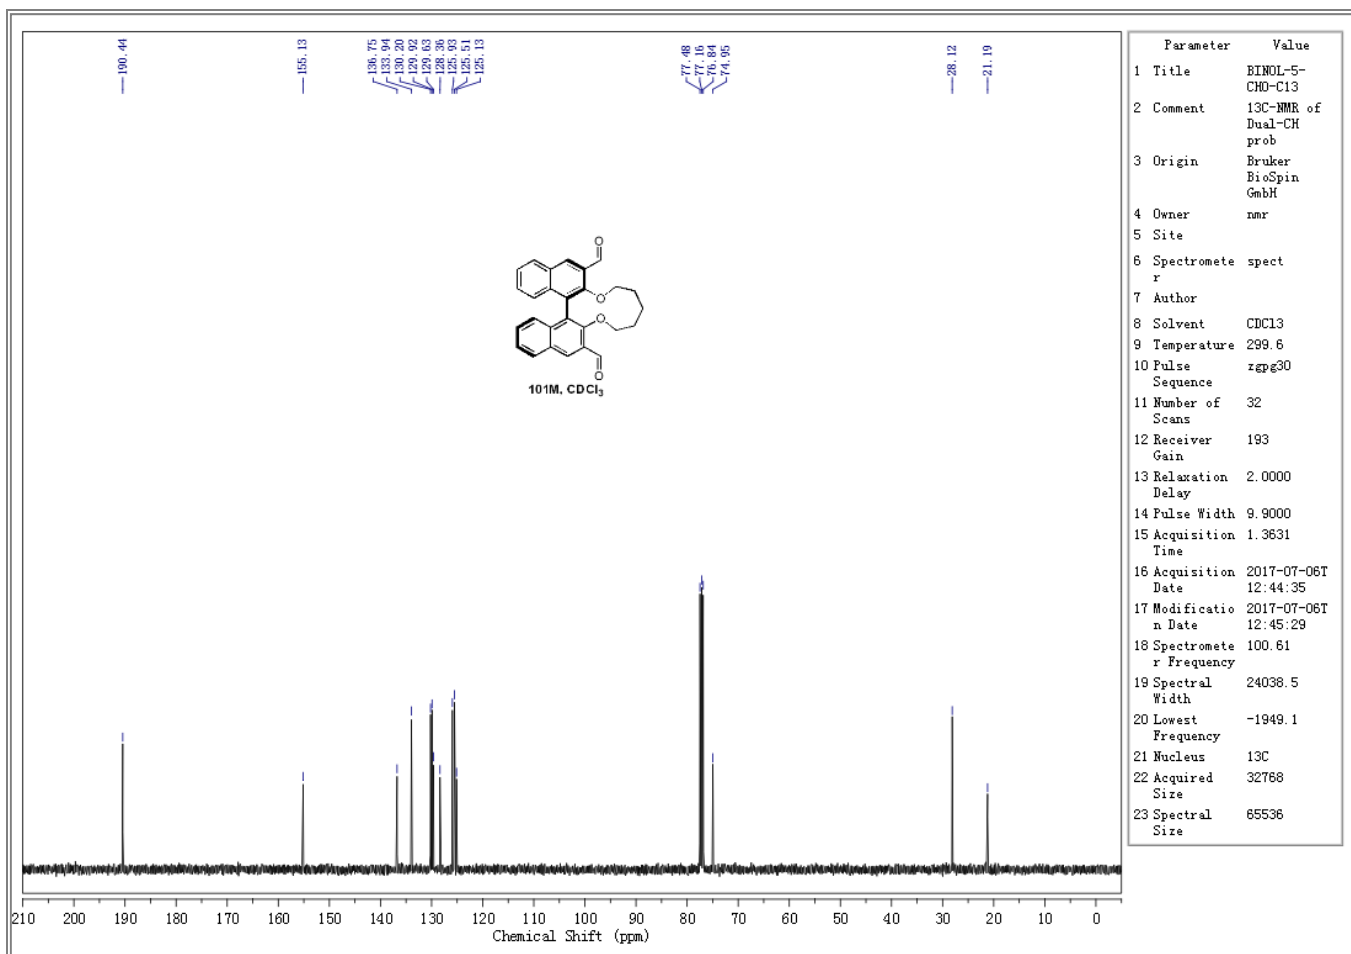

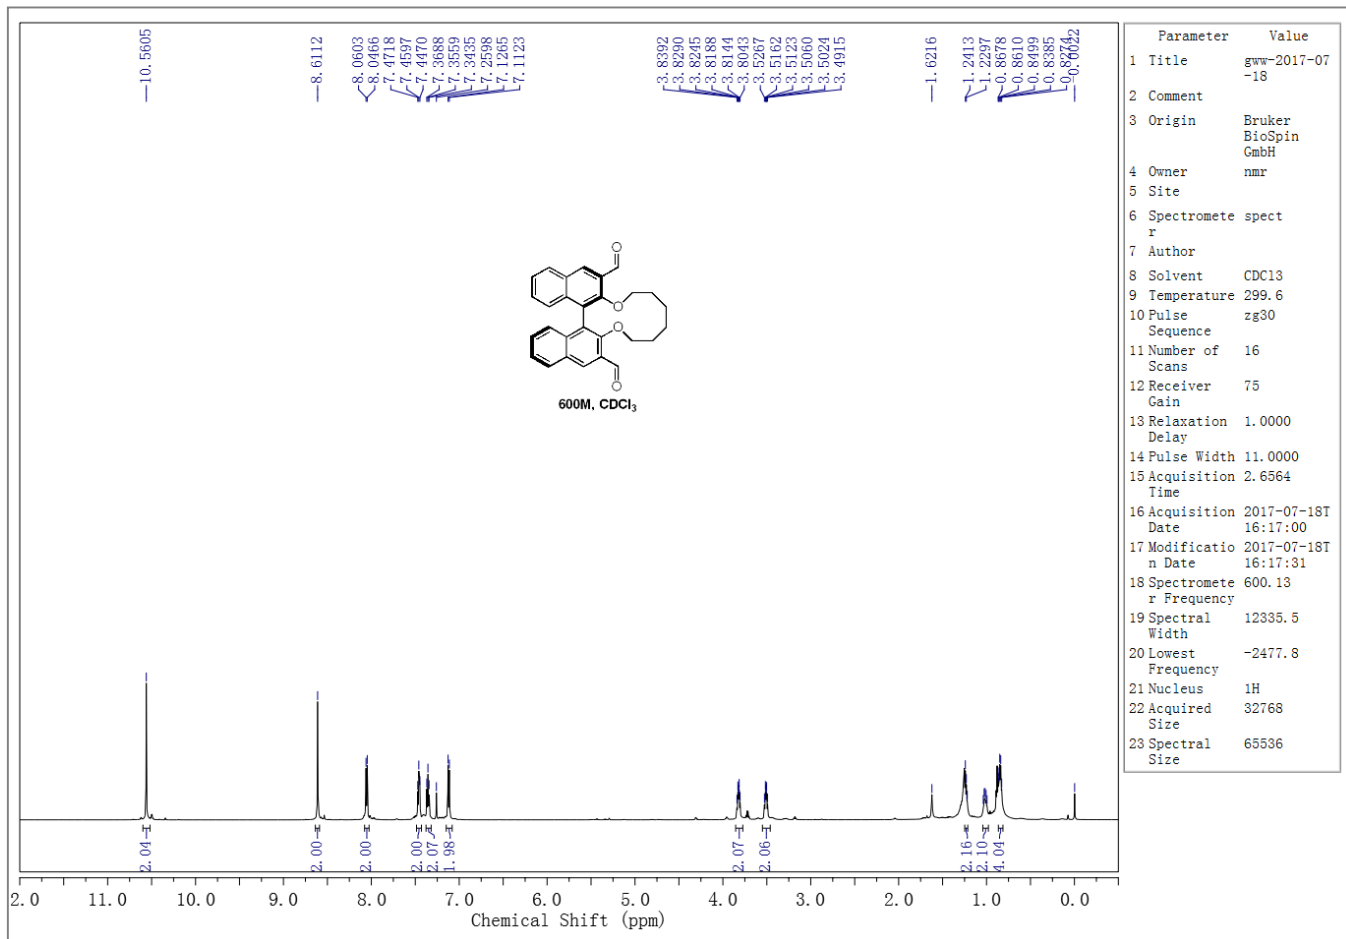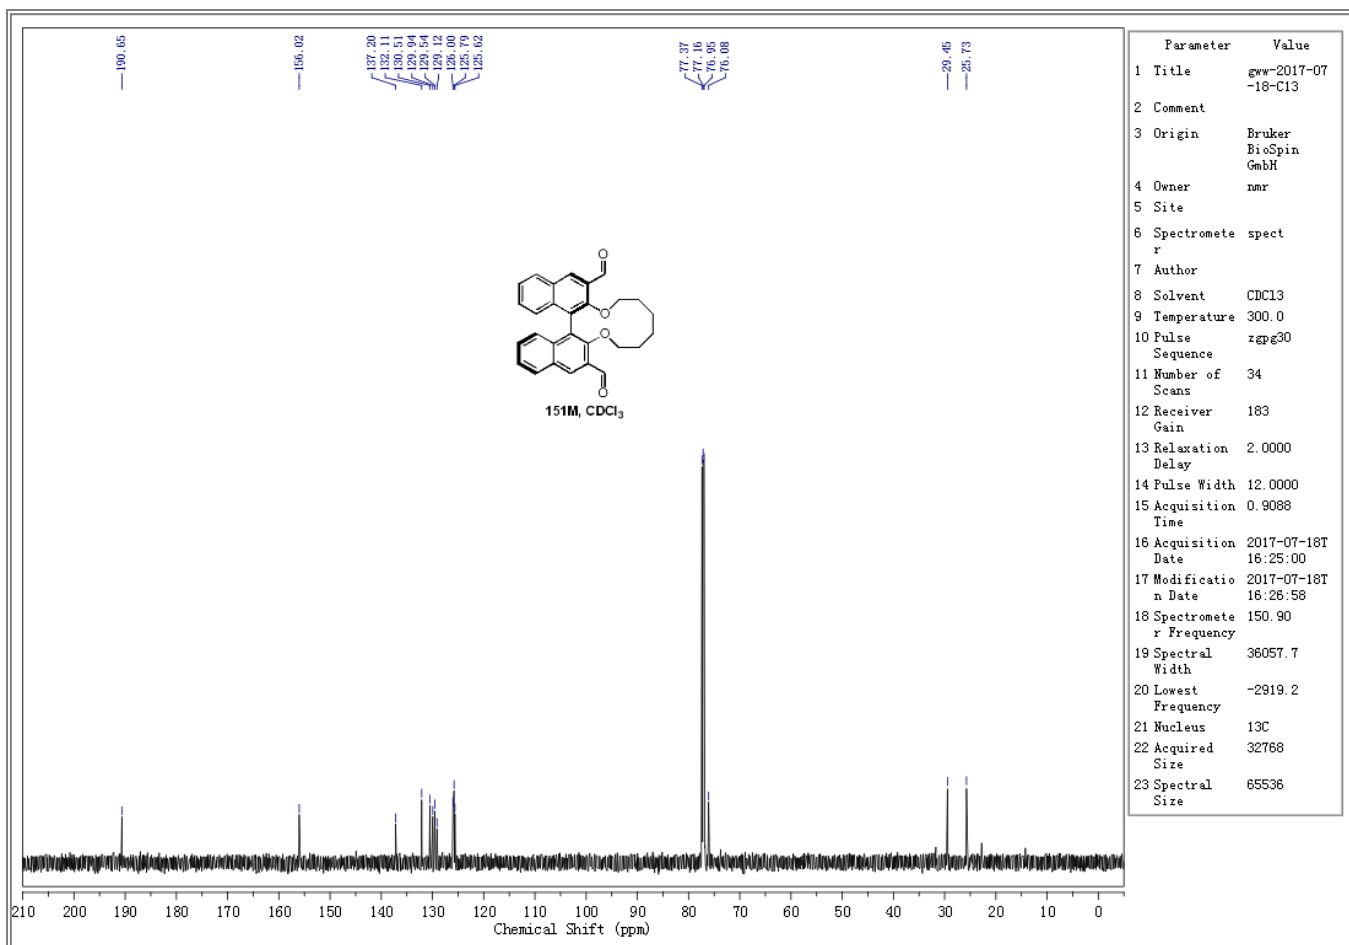

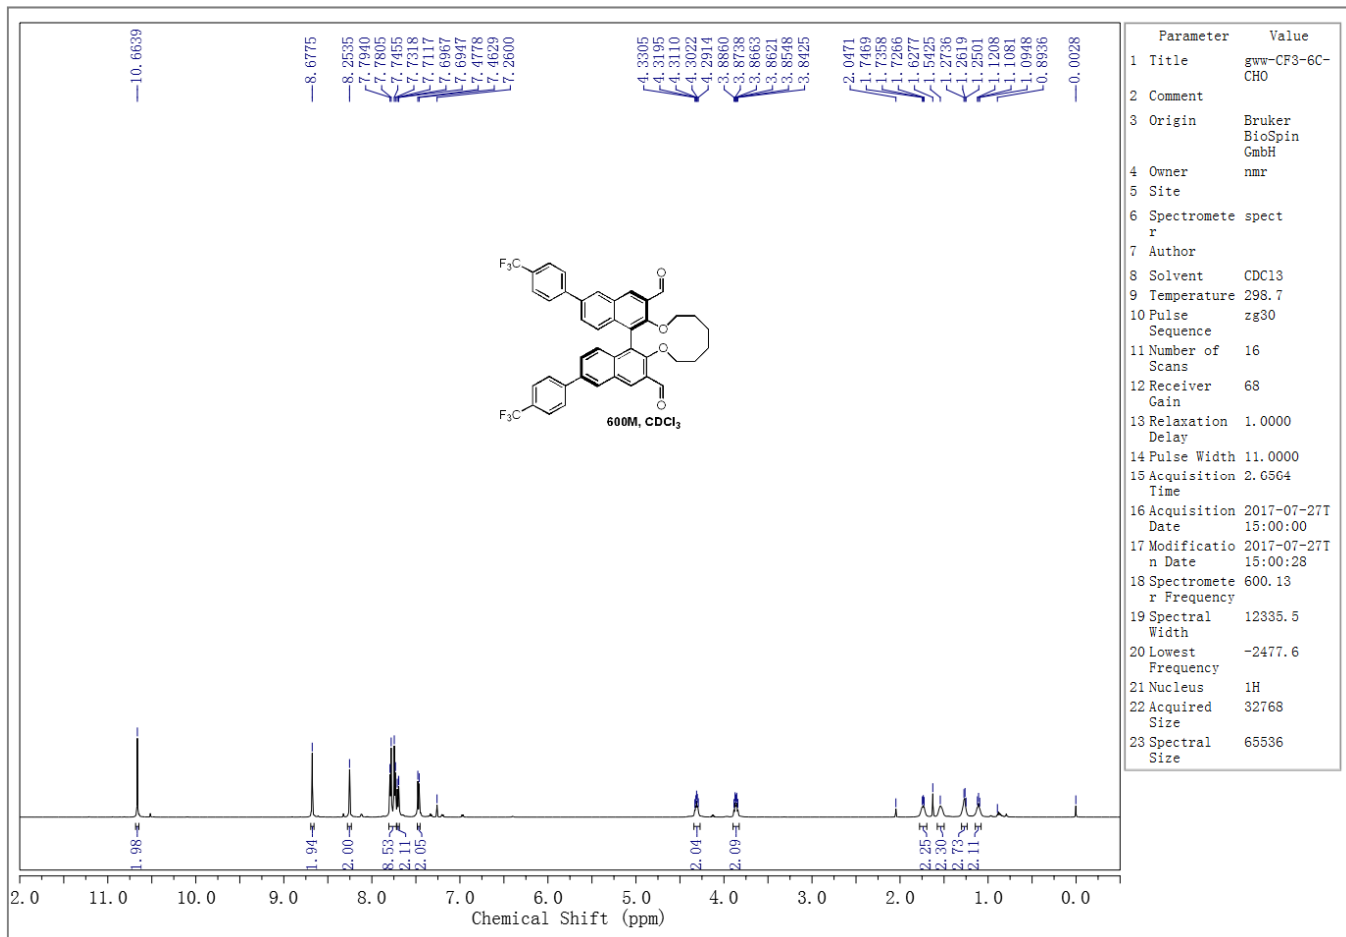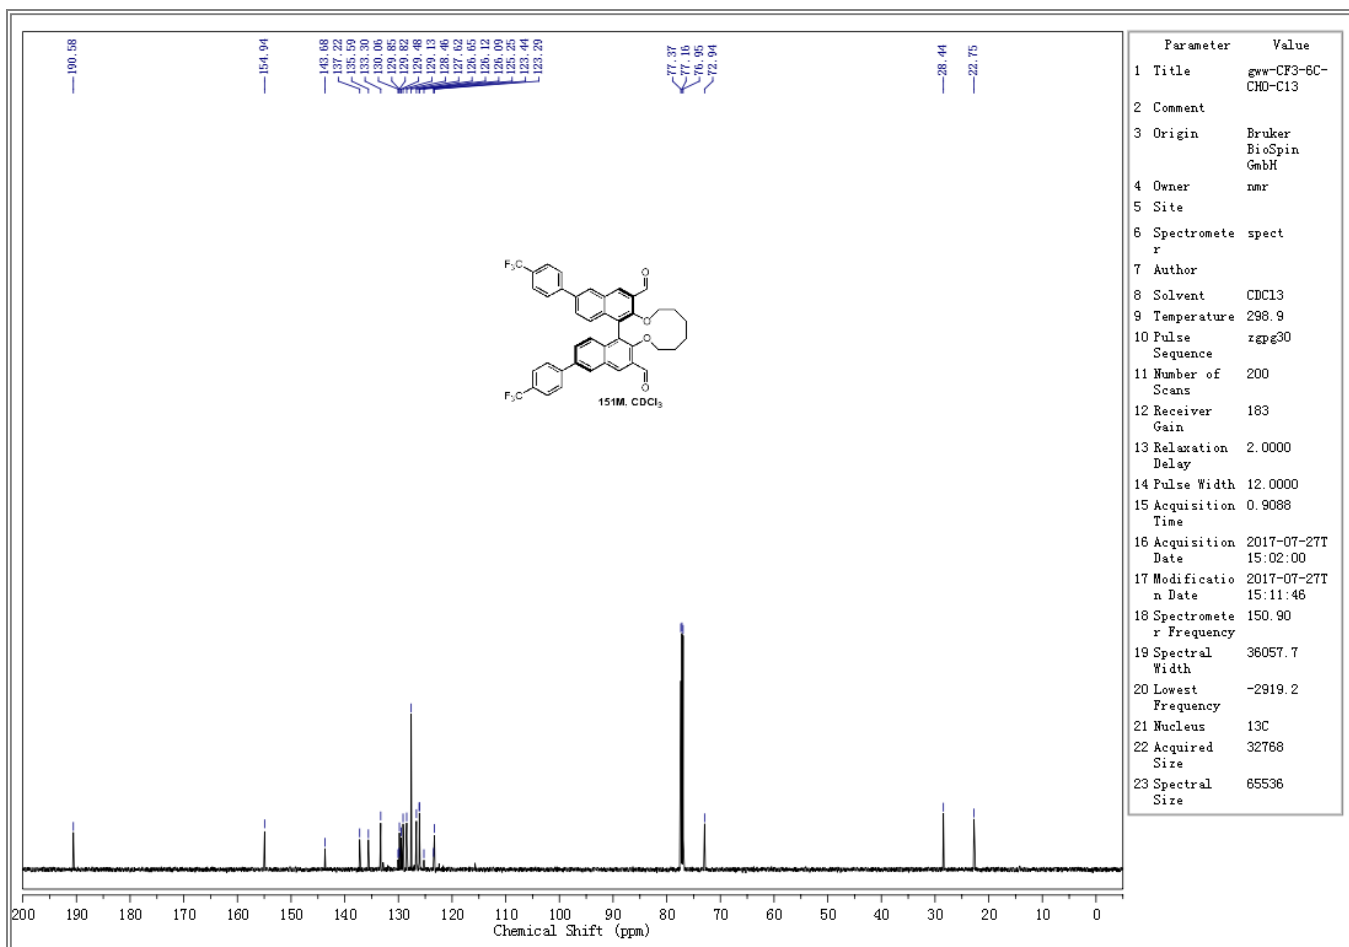

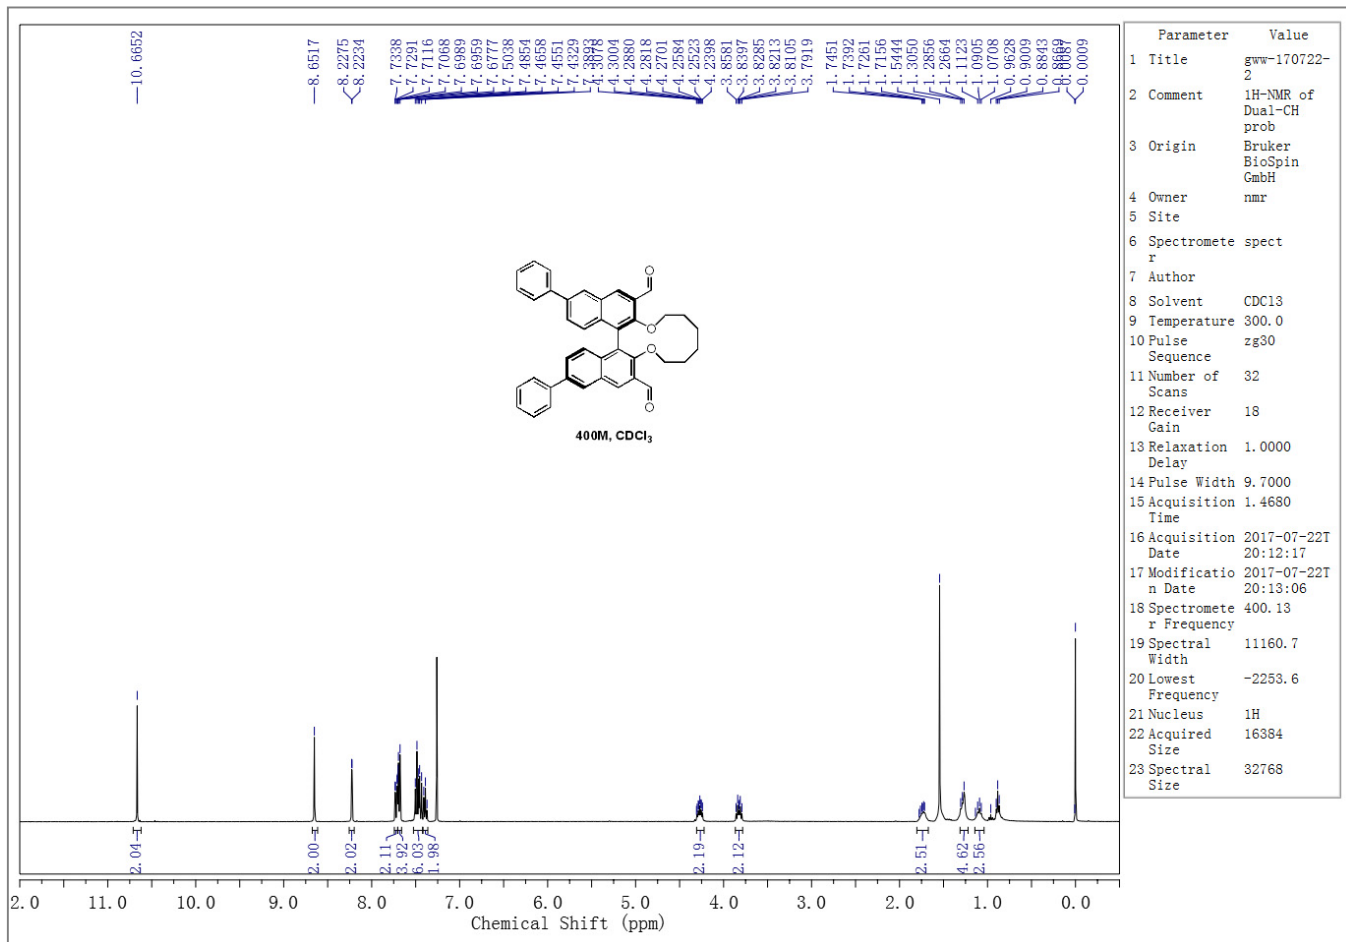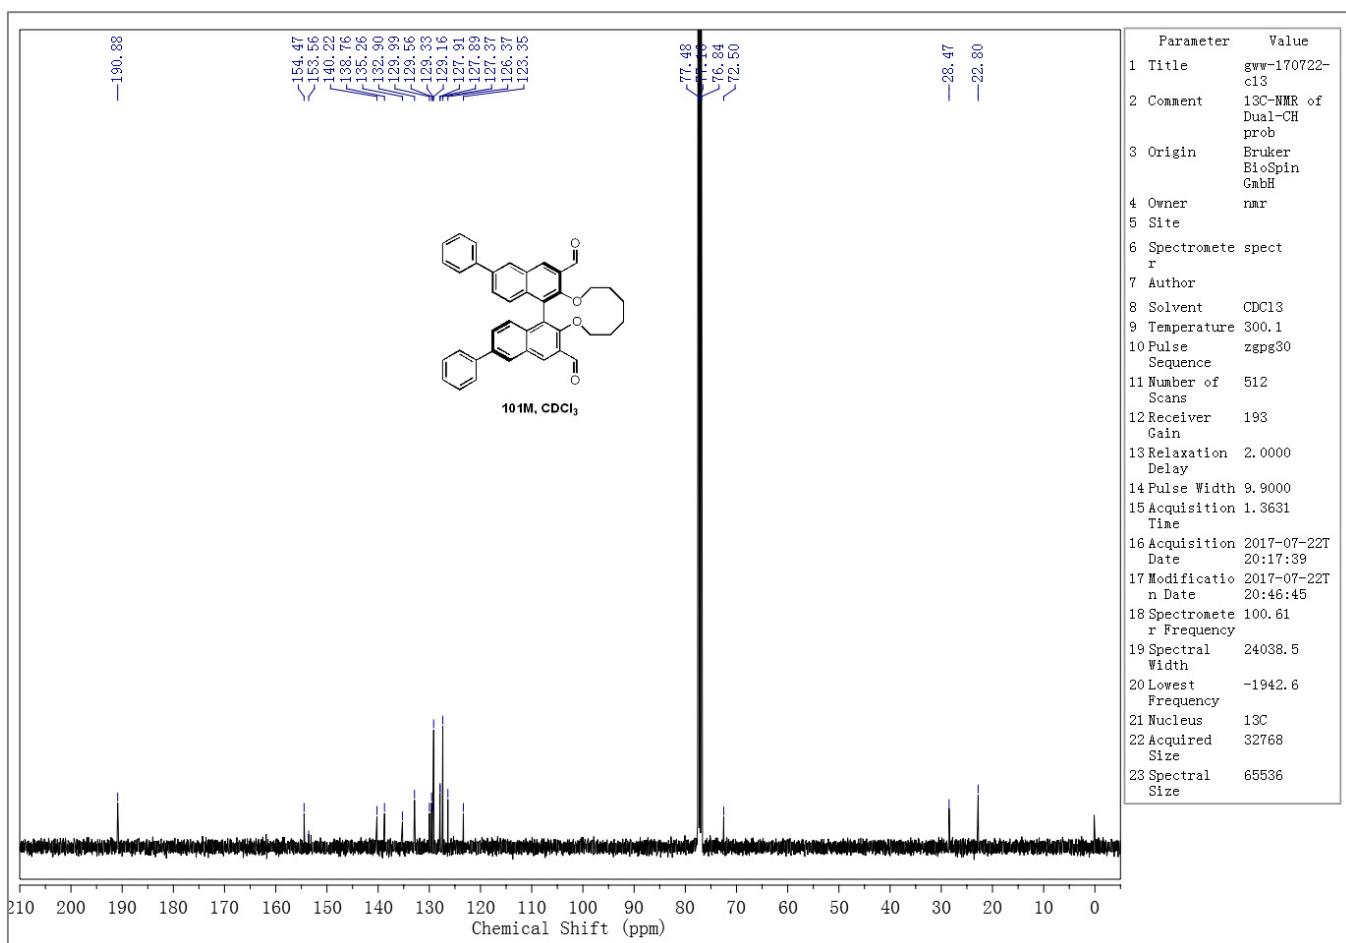

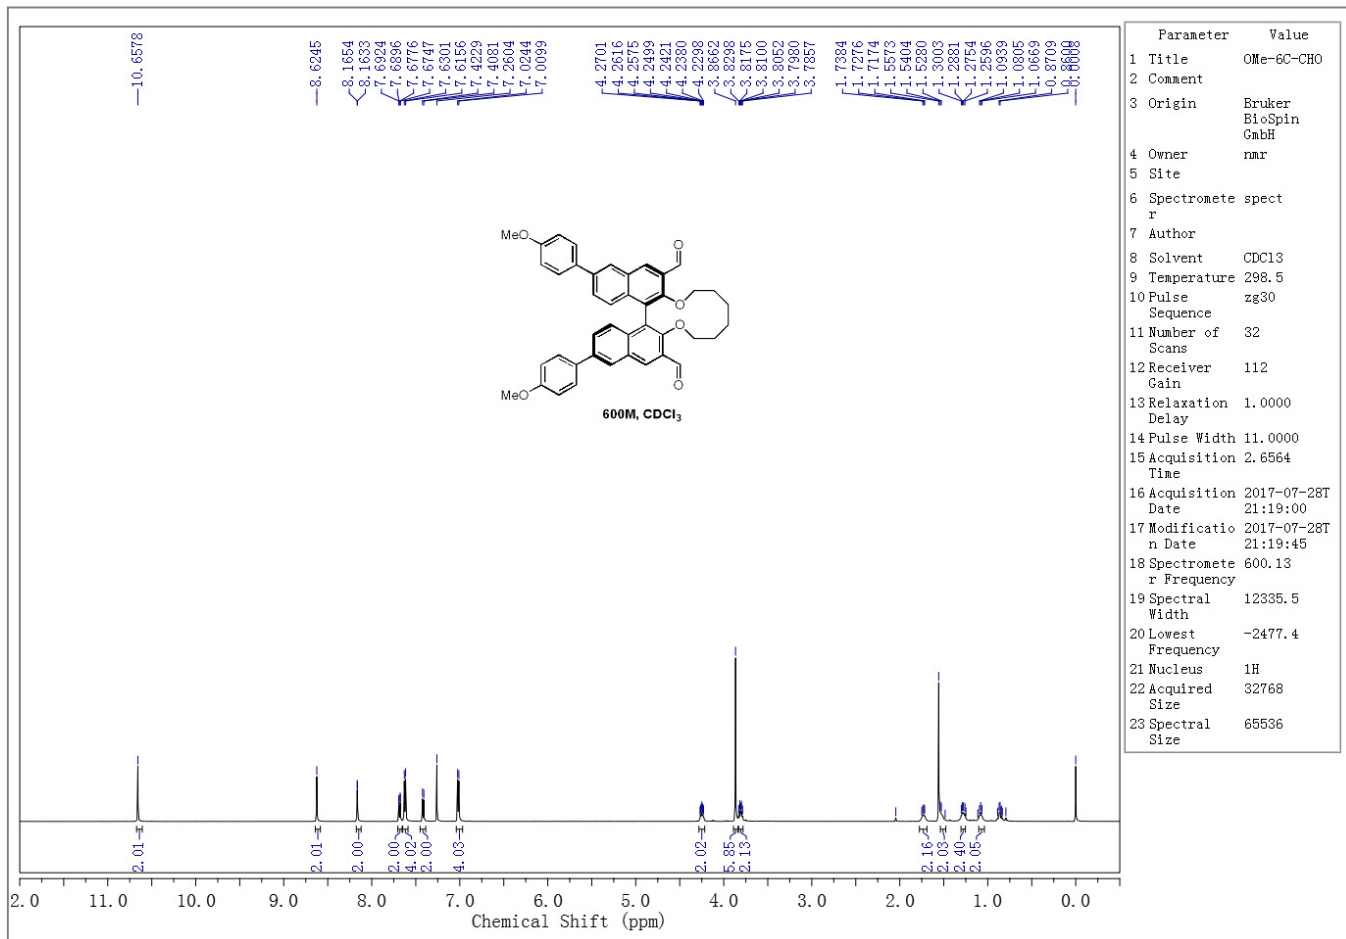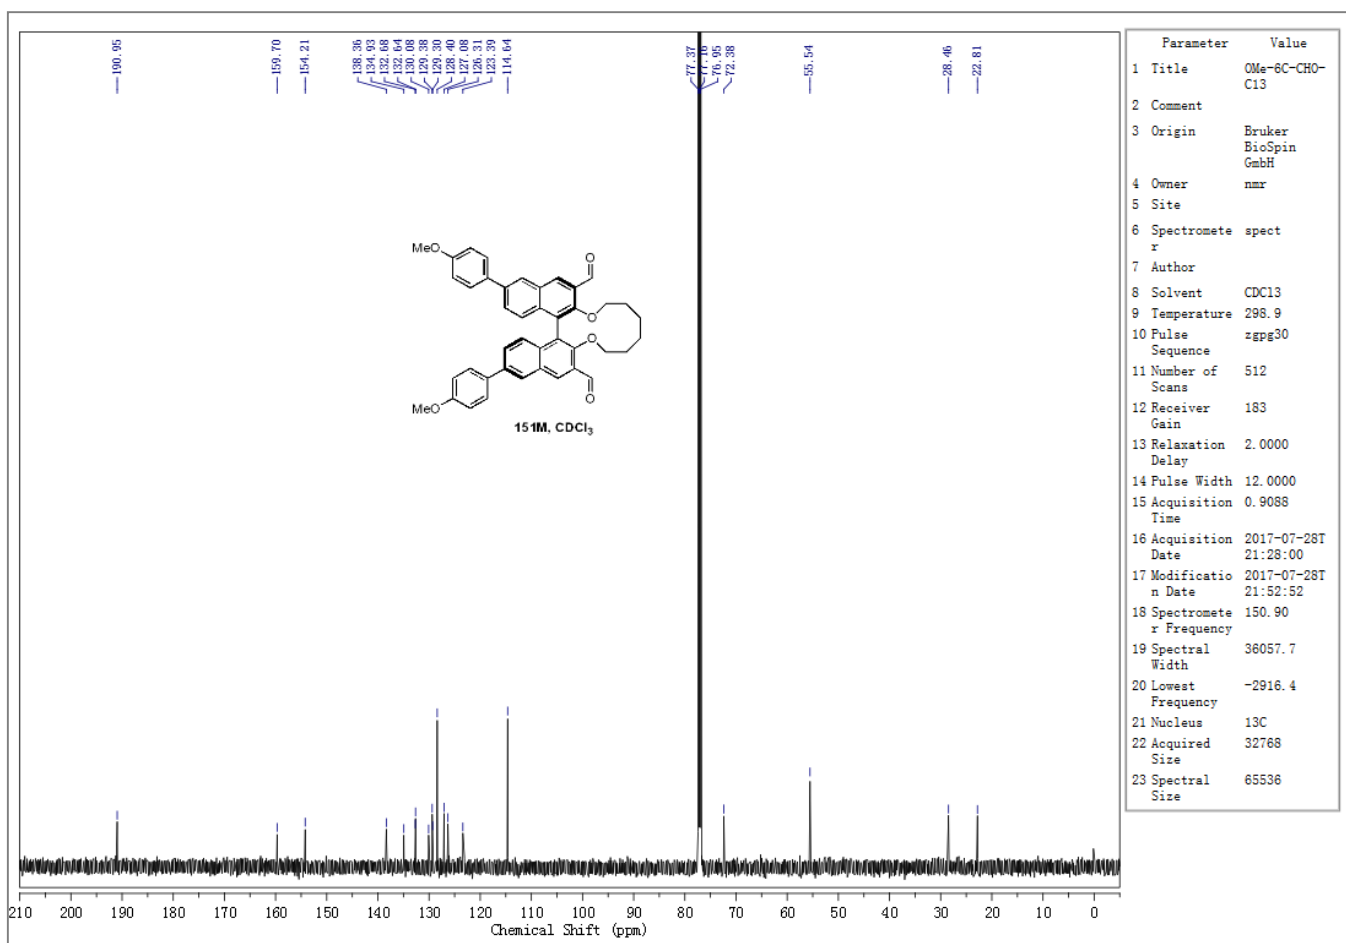

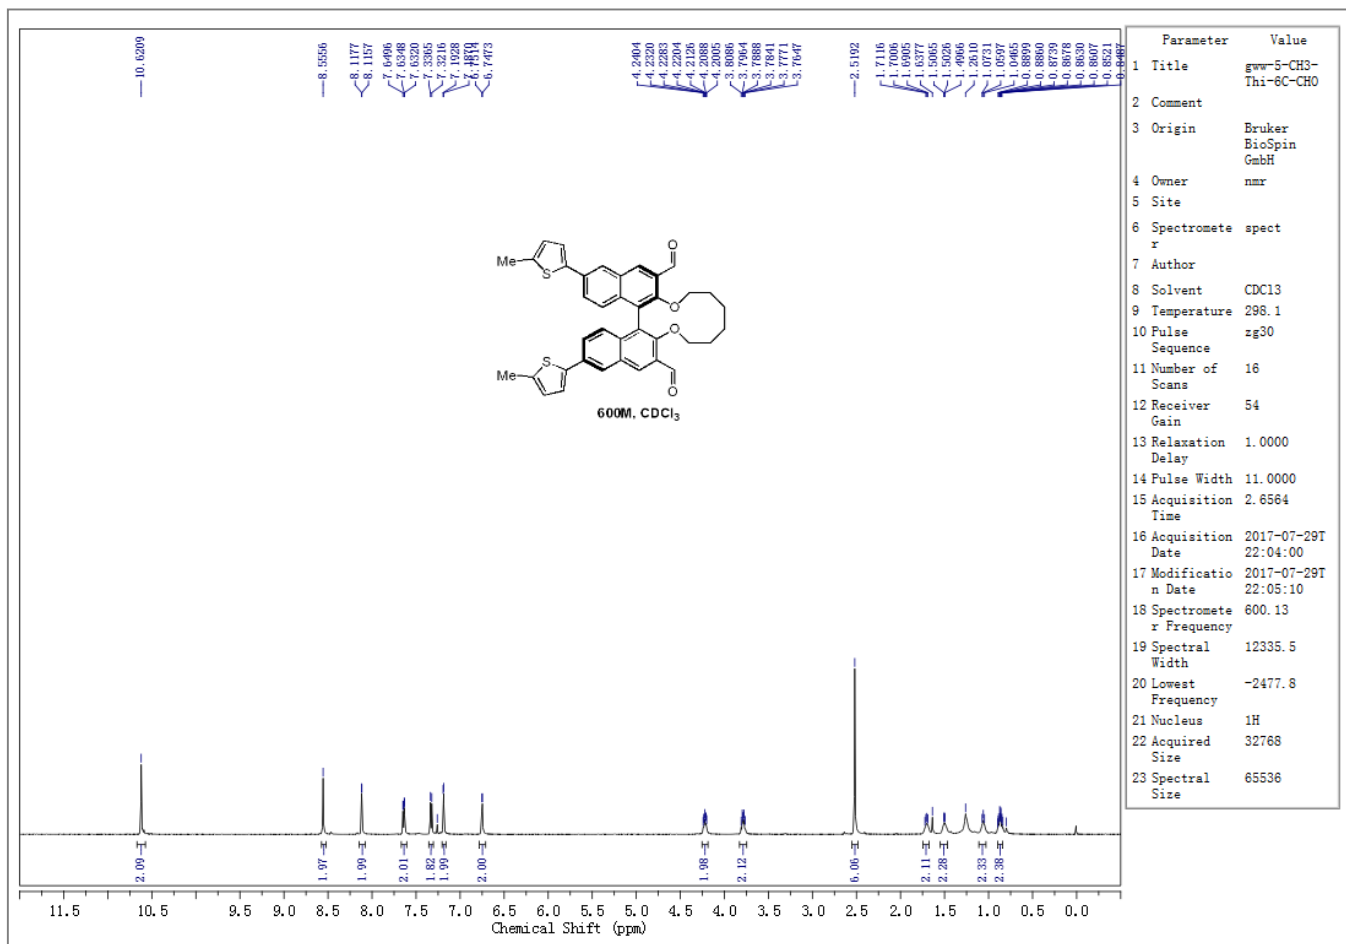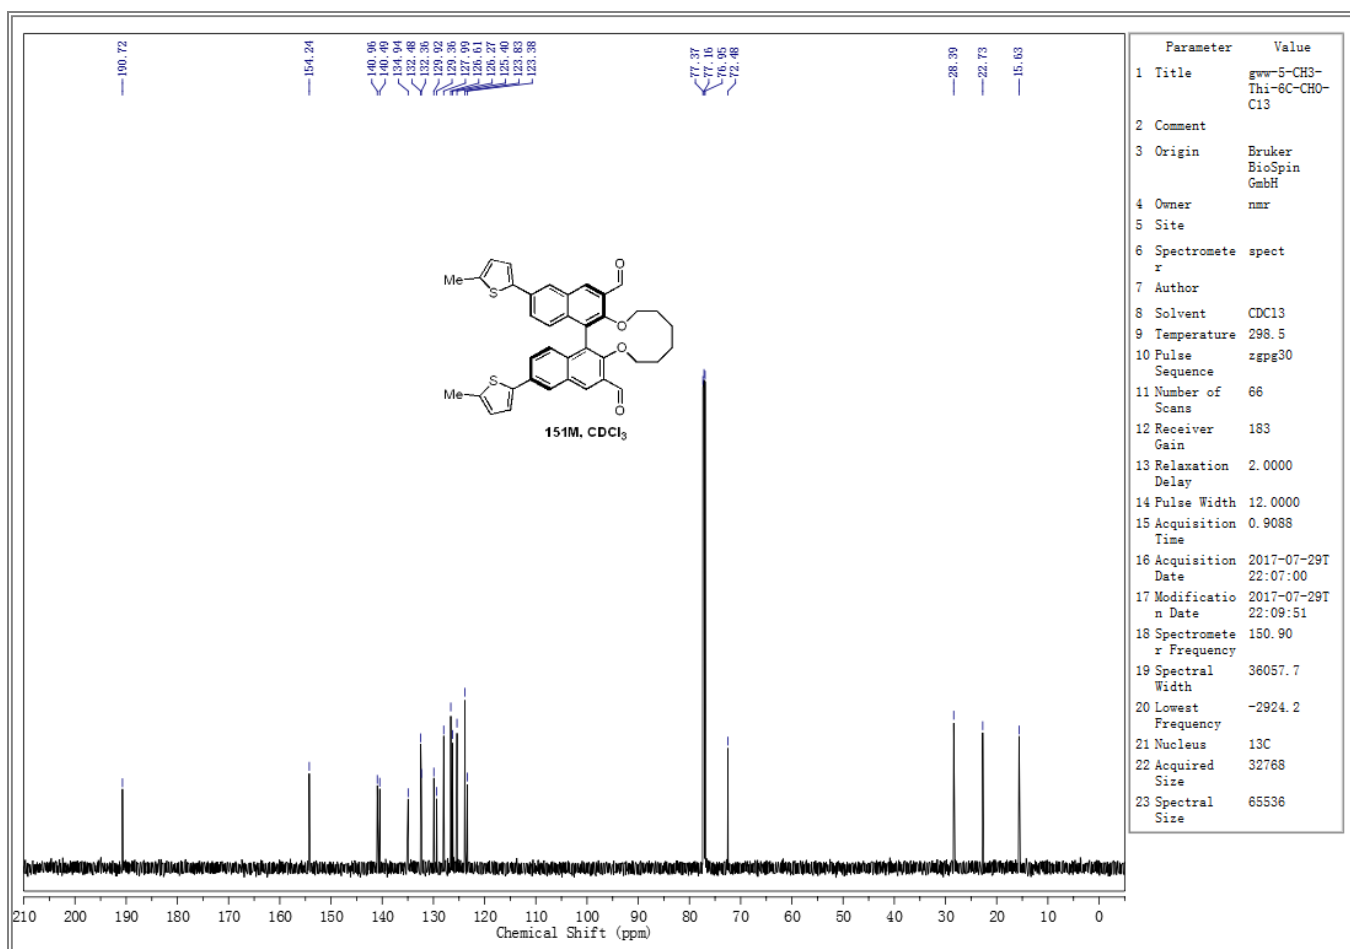

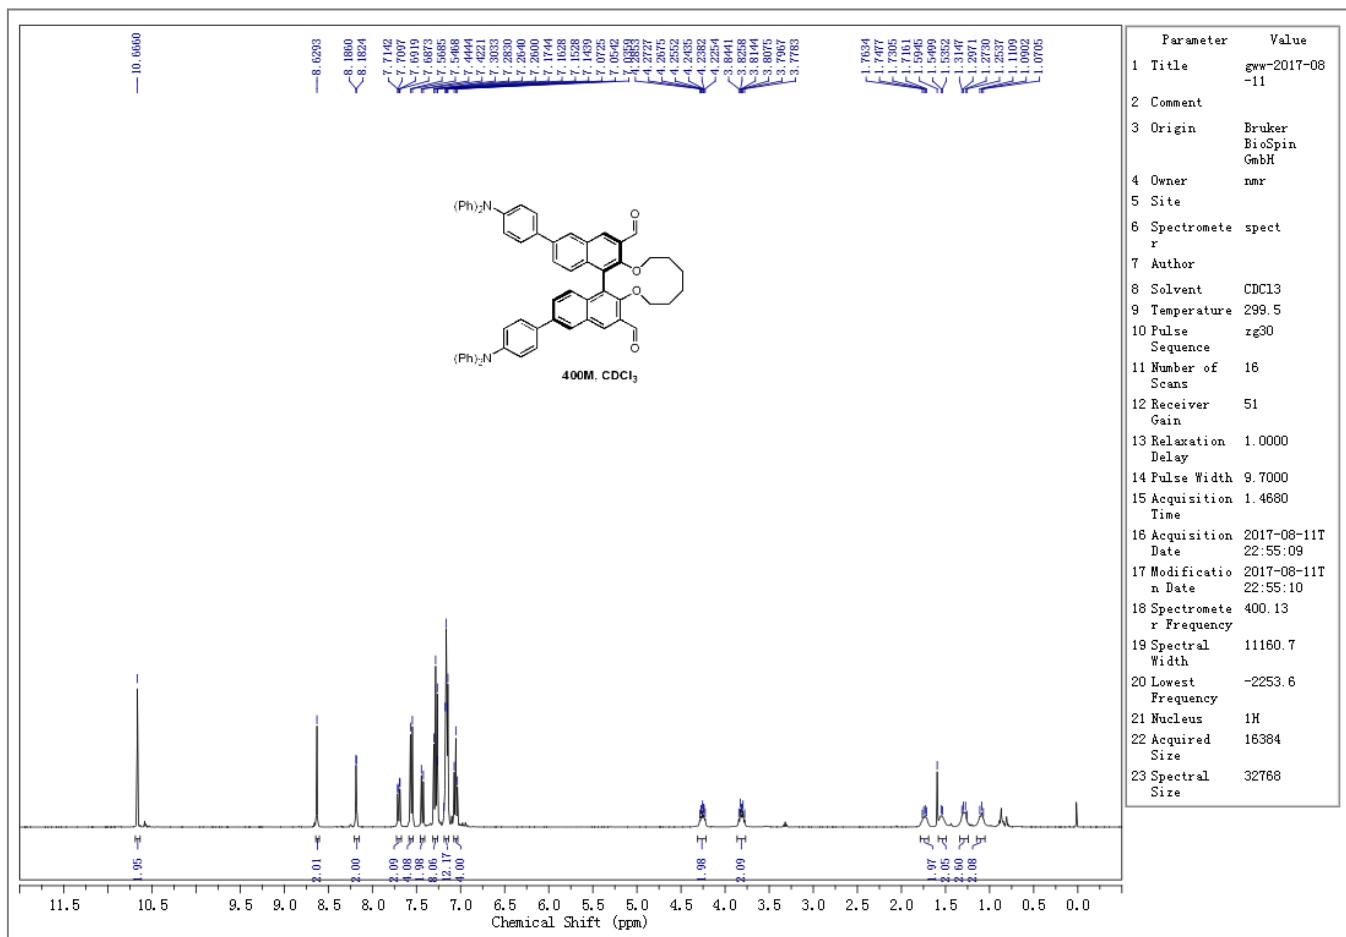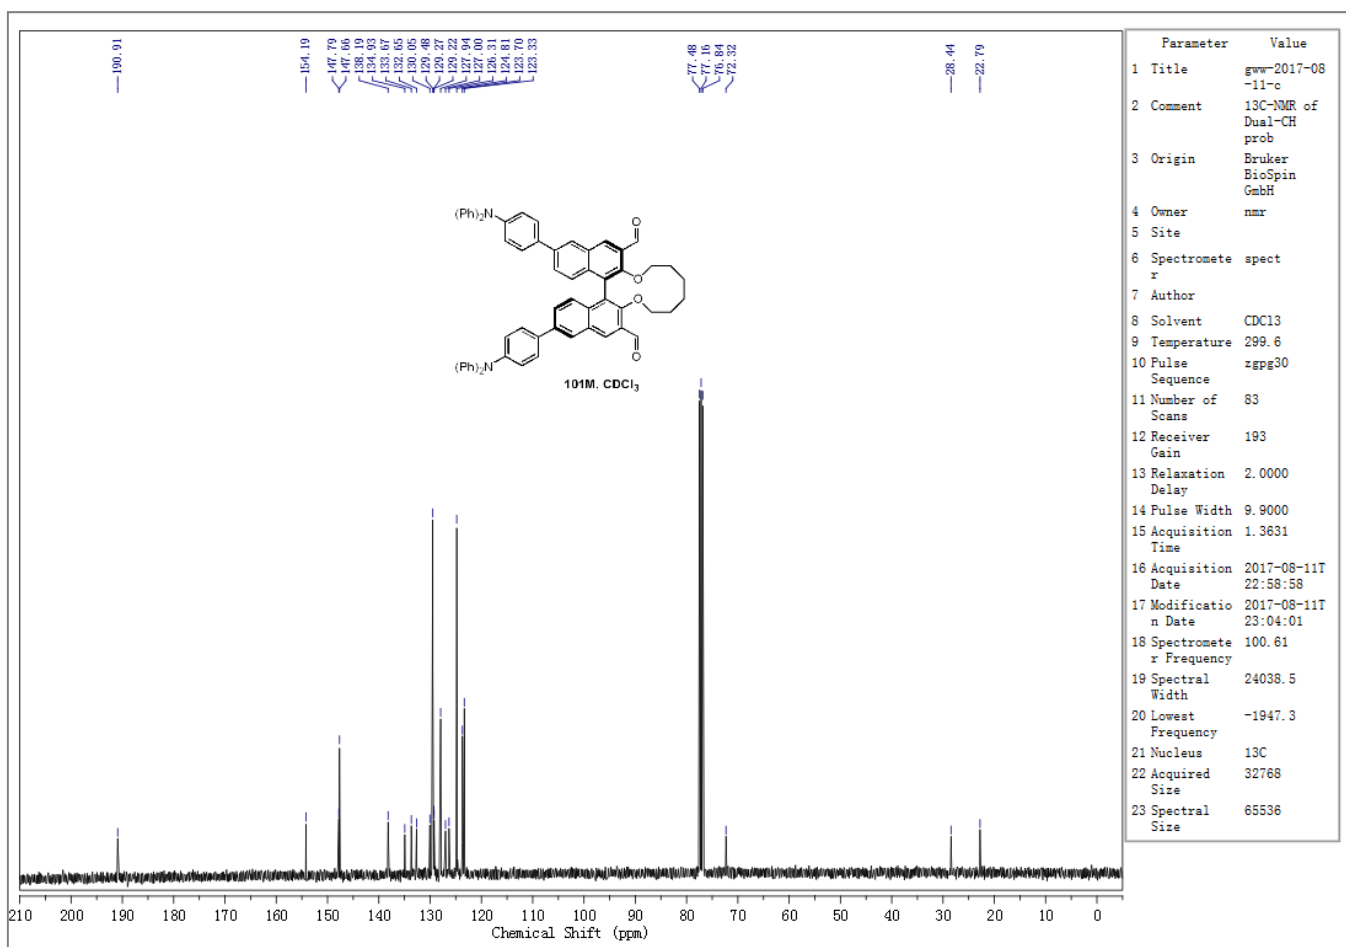



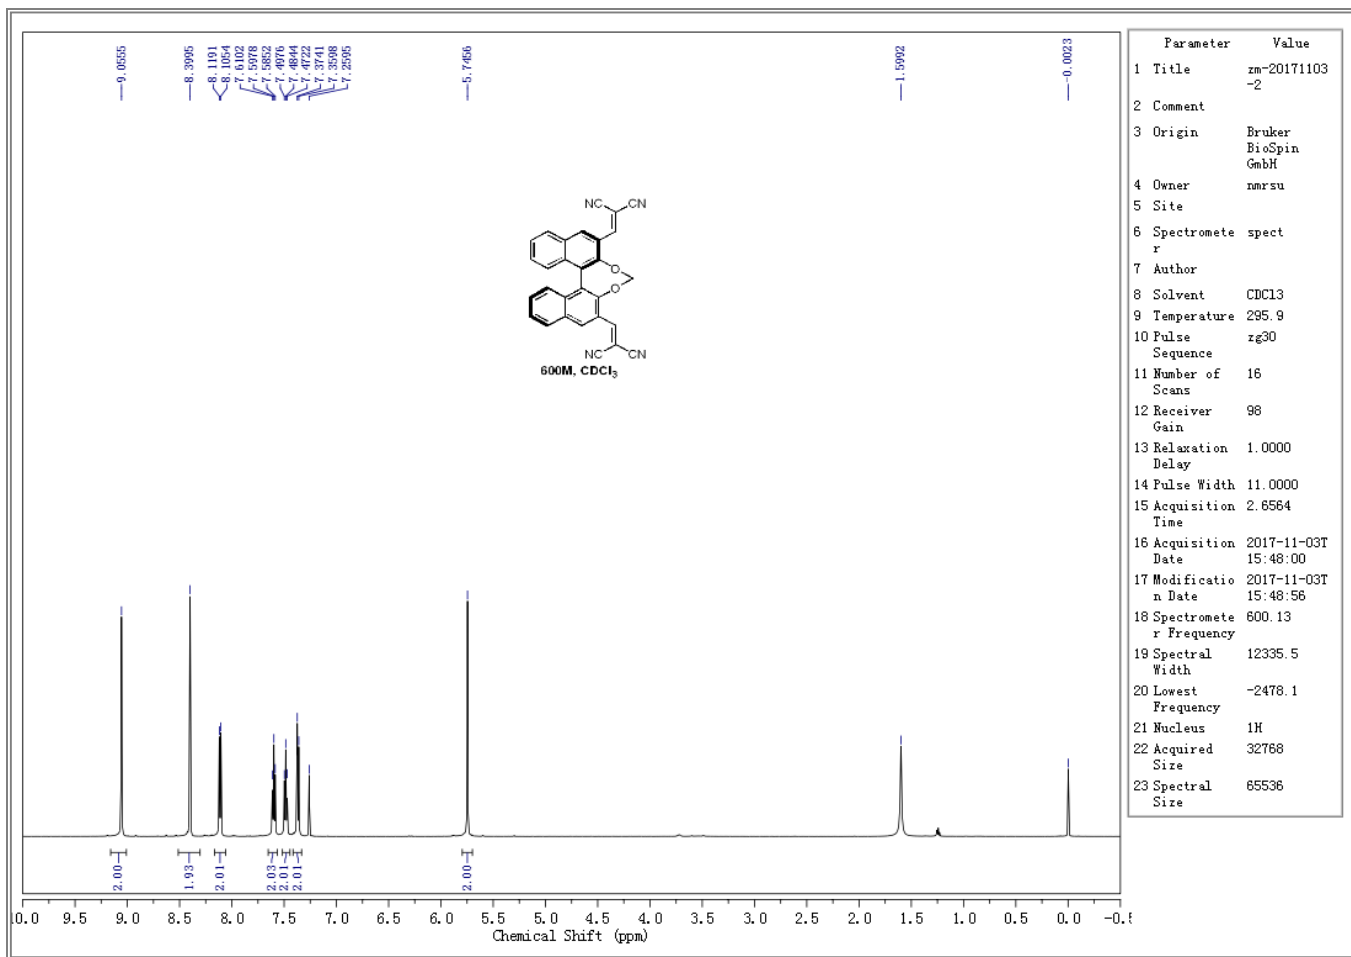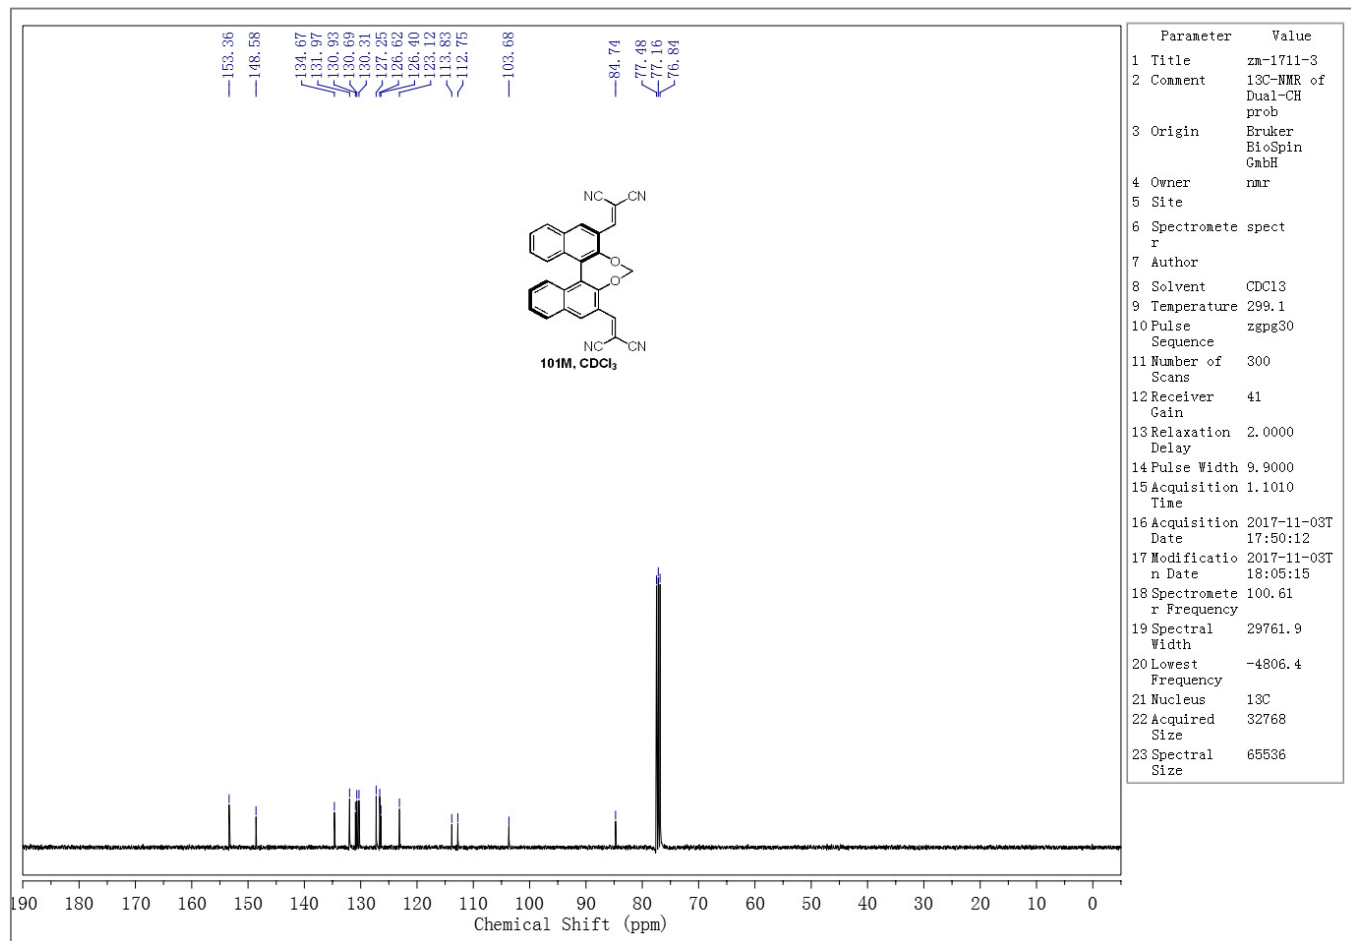

[Compounds chart](#)   [Data](#)   [X-ray](#)

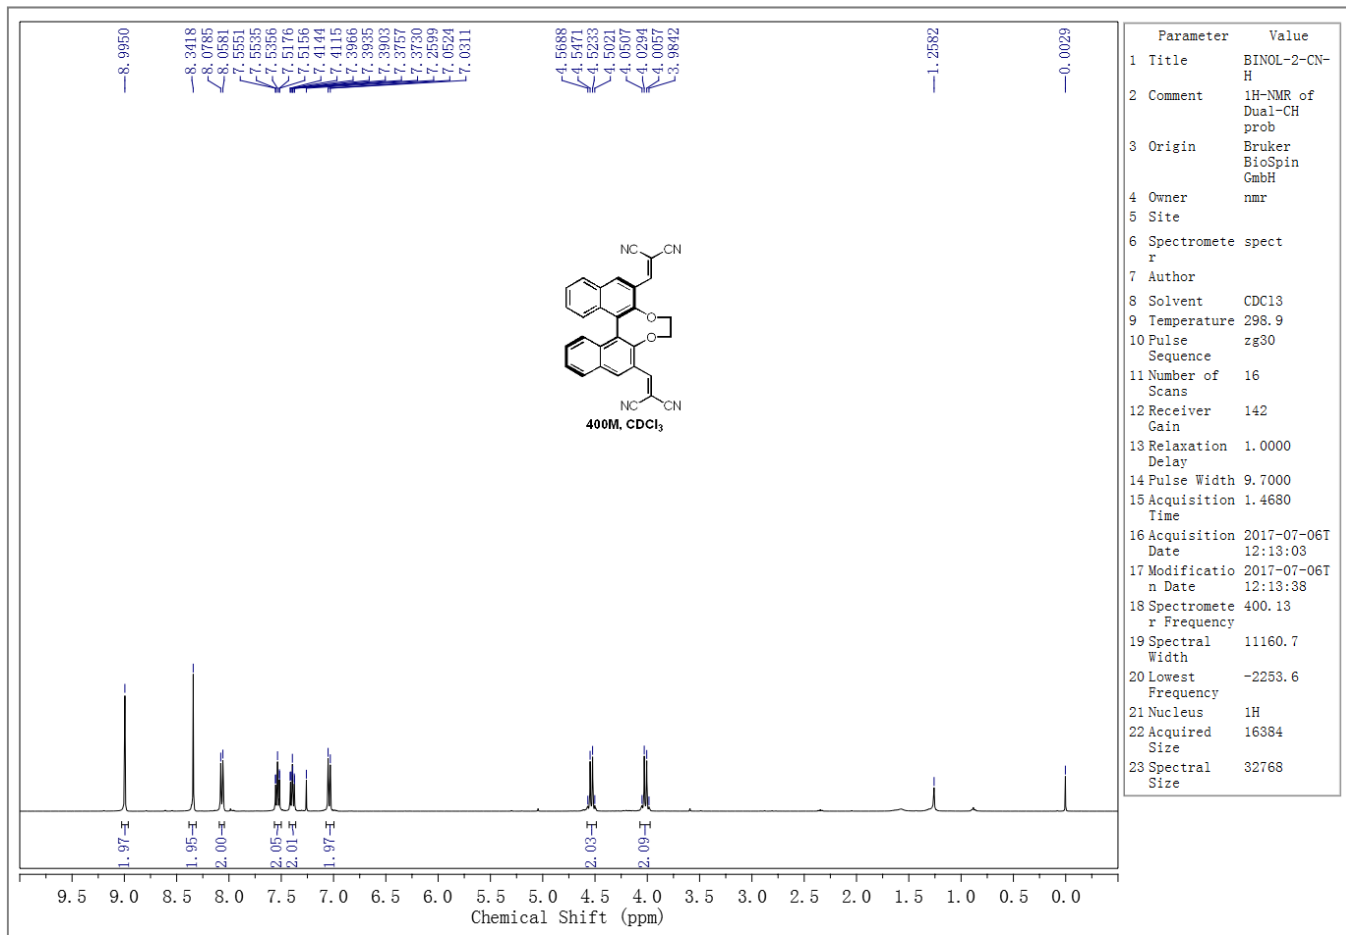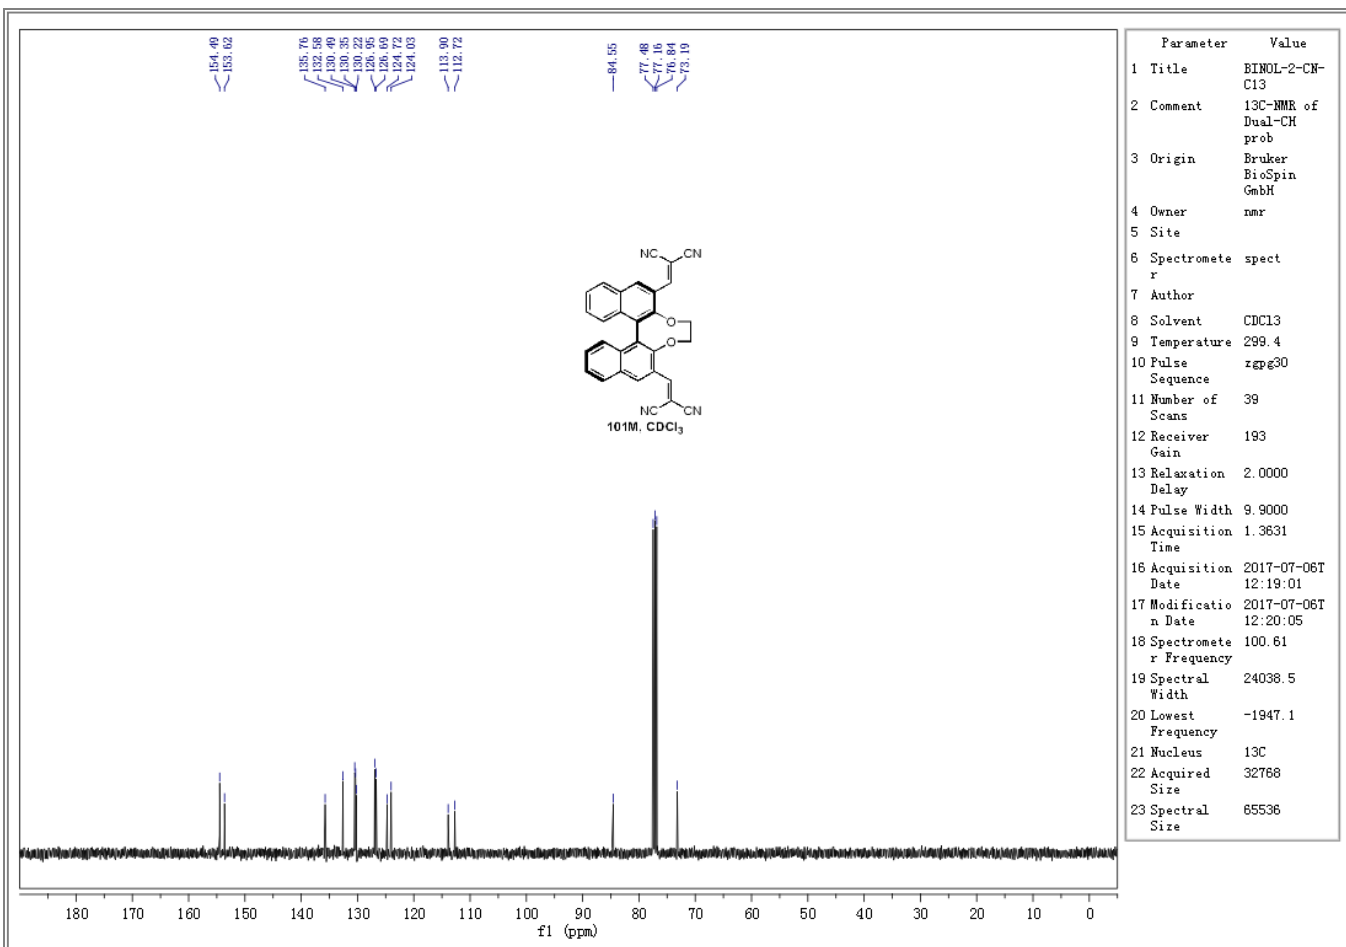

[Compounds chart](#)   [Data](#)   [X-ray](#)

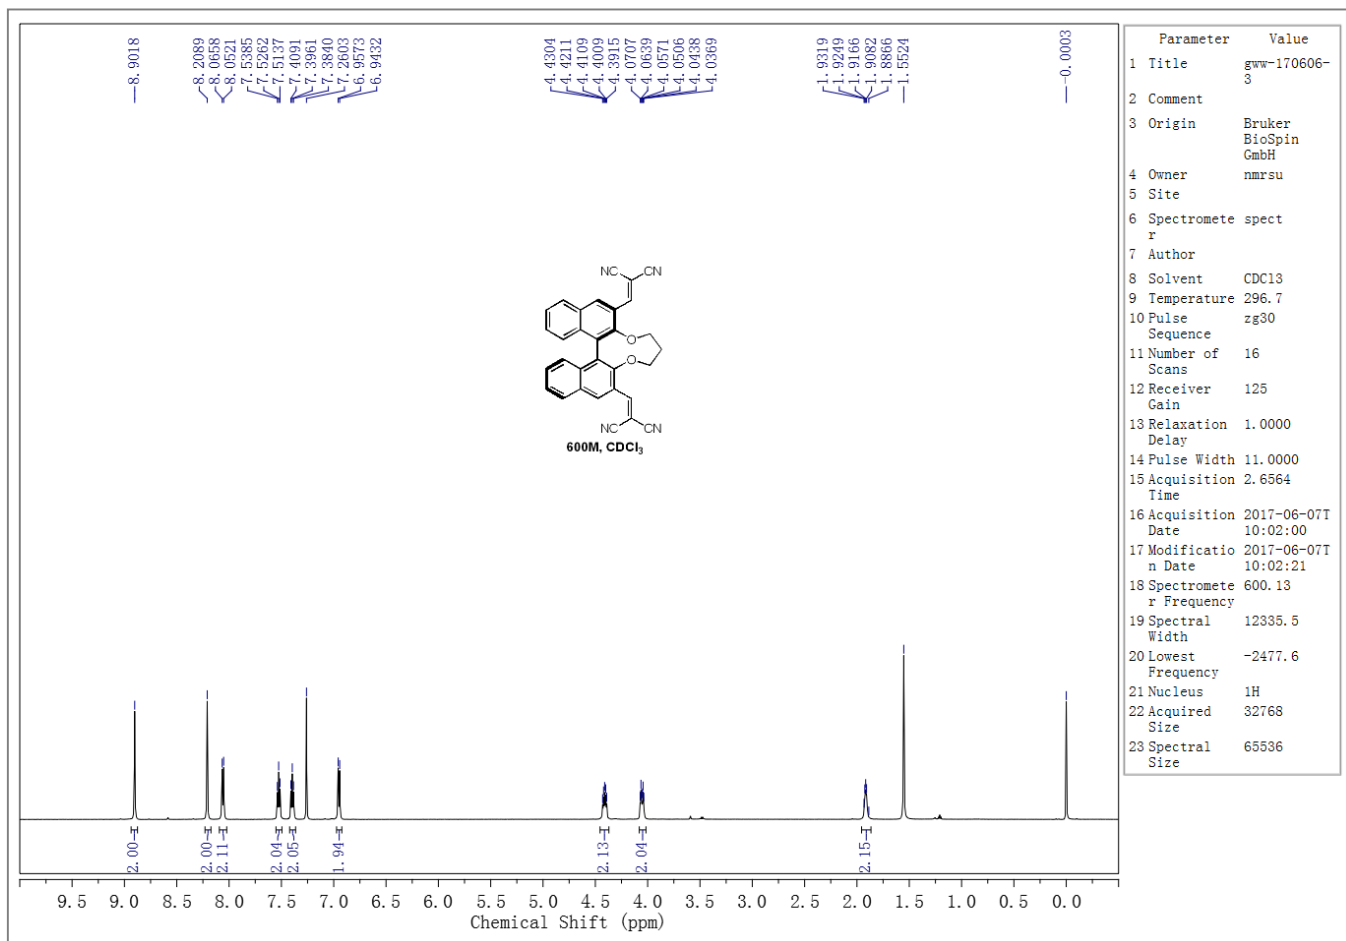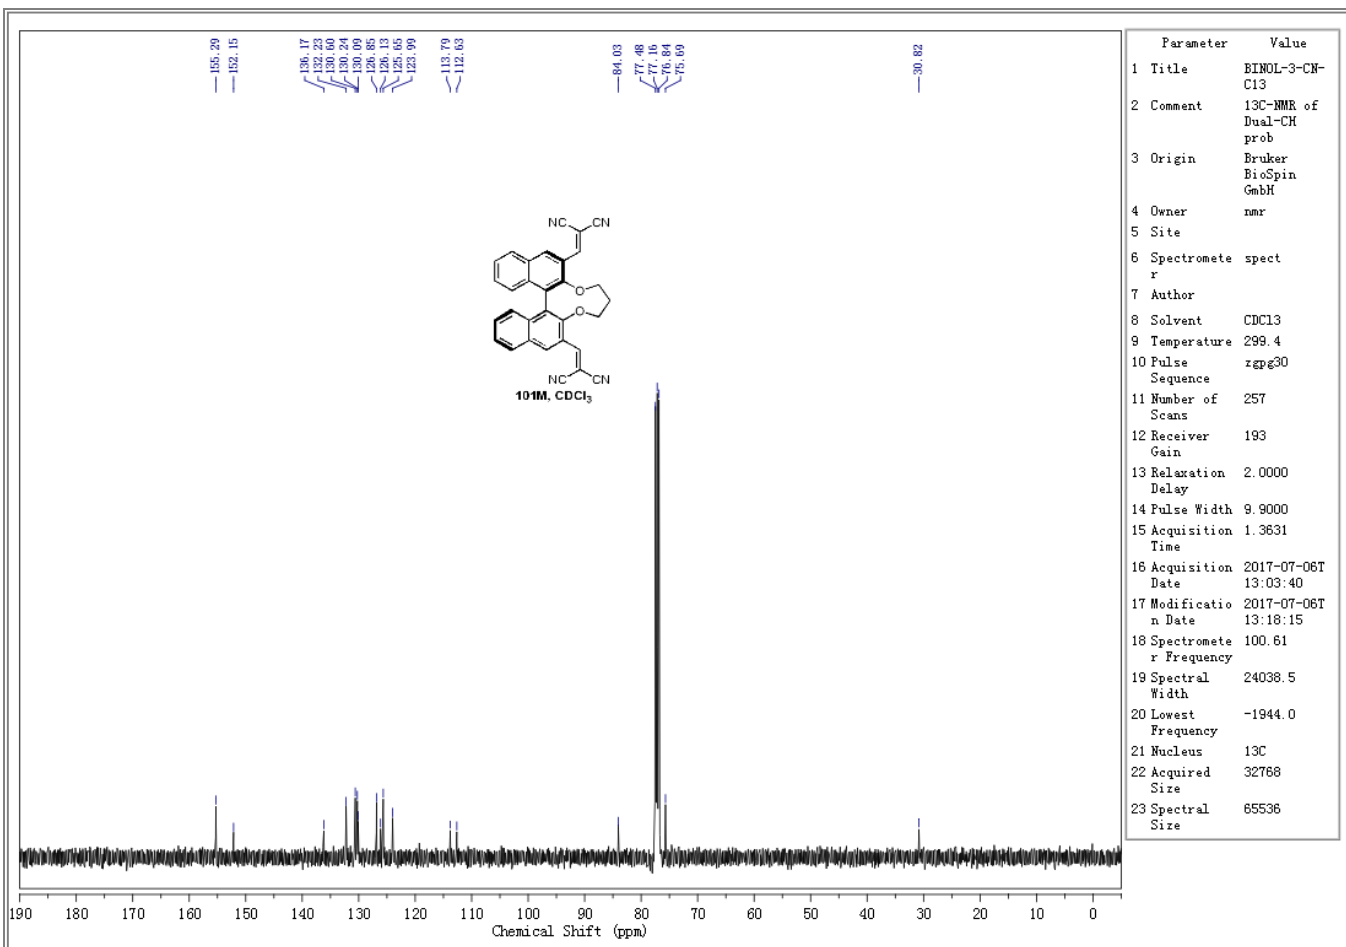

[Compounds chart](#)   [Data](#)

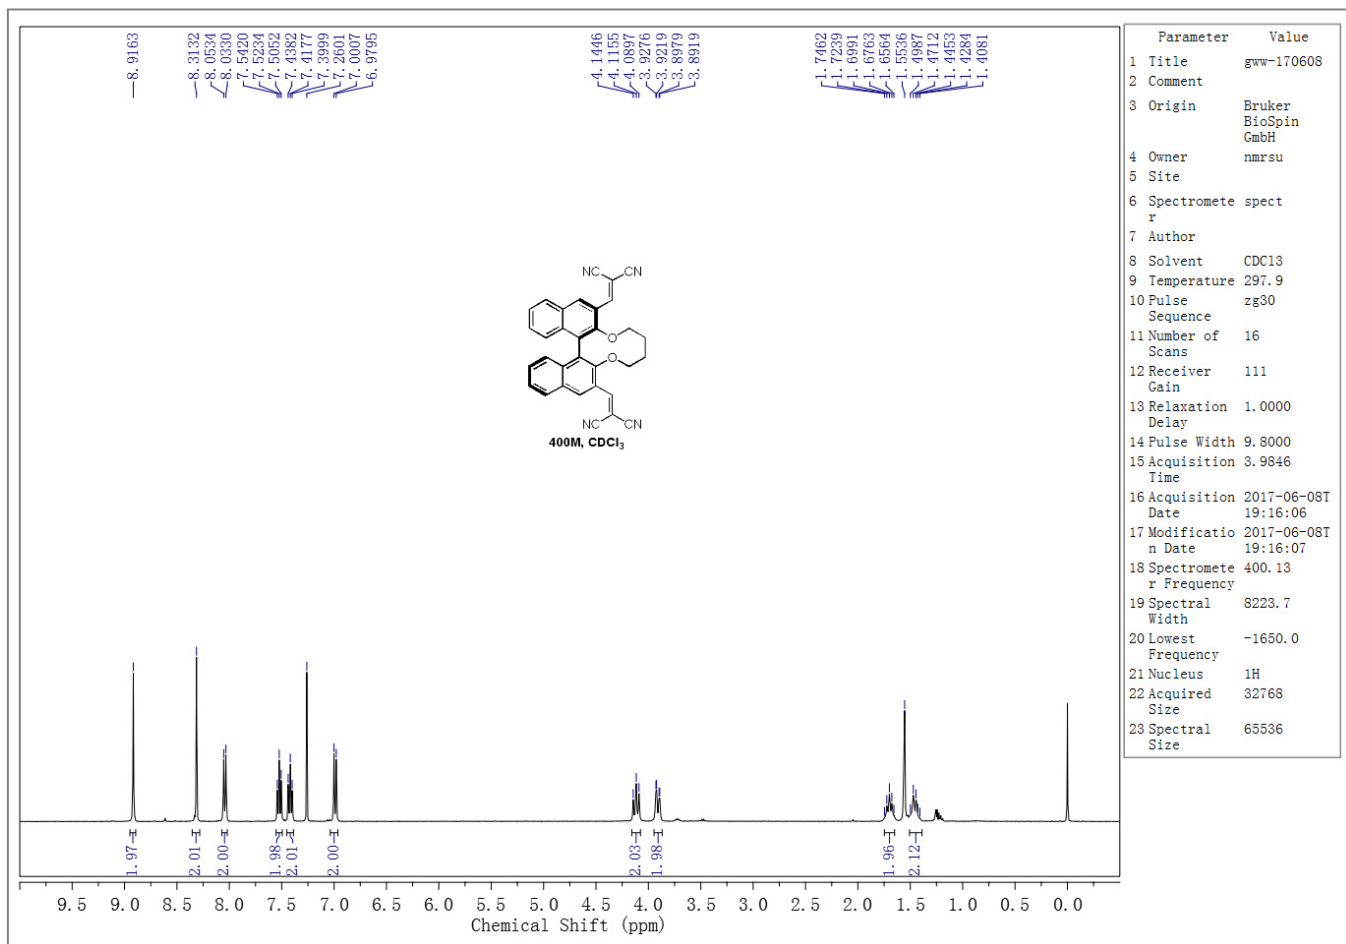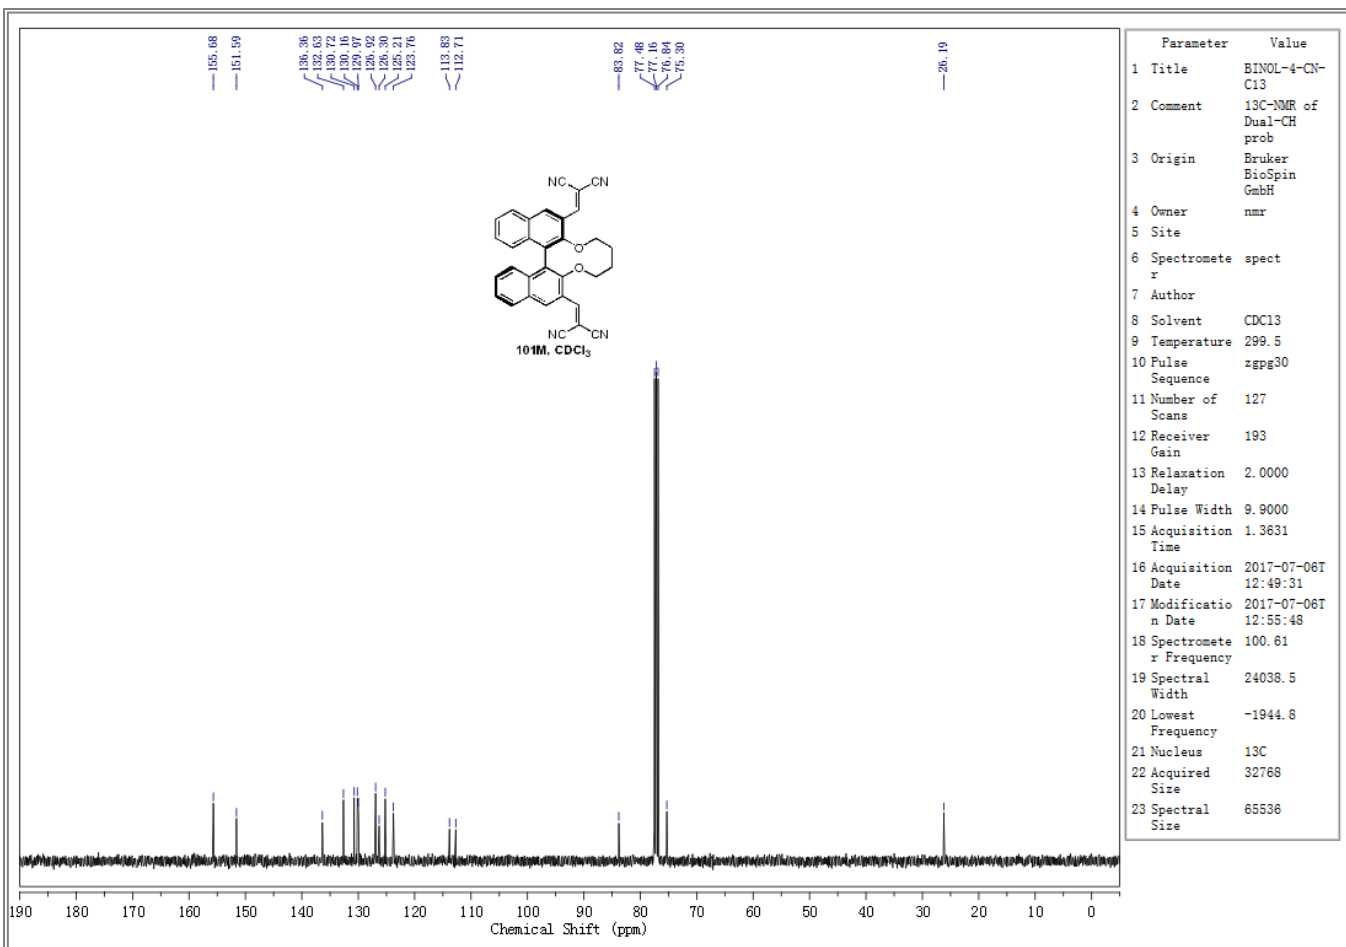

[Compounds chart](#)

[Data](#)

[X-ray](#)

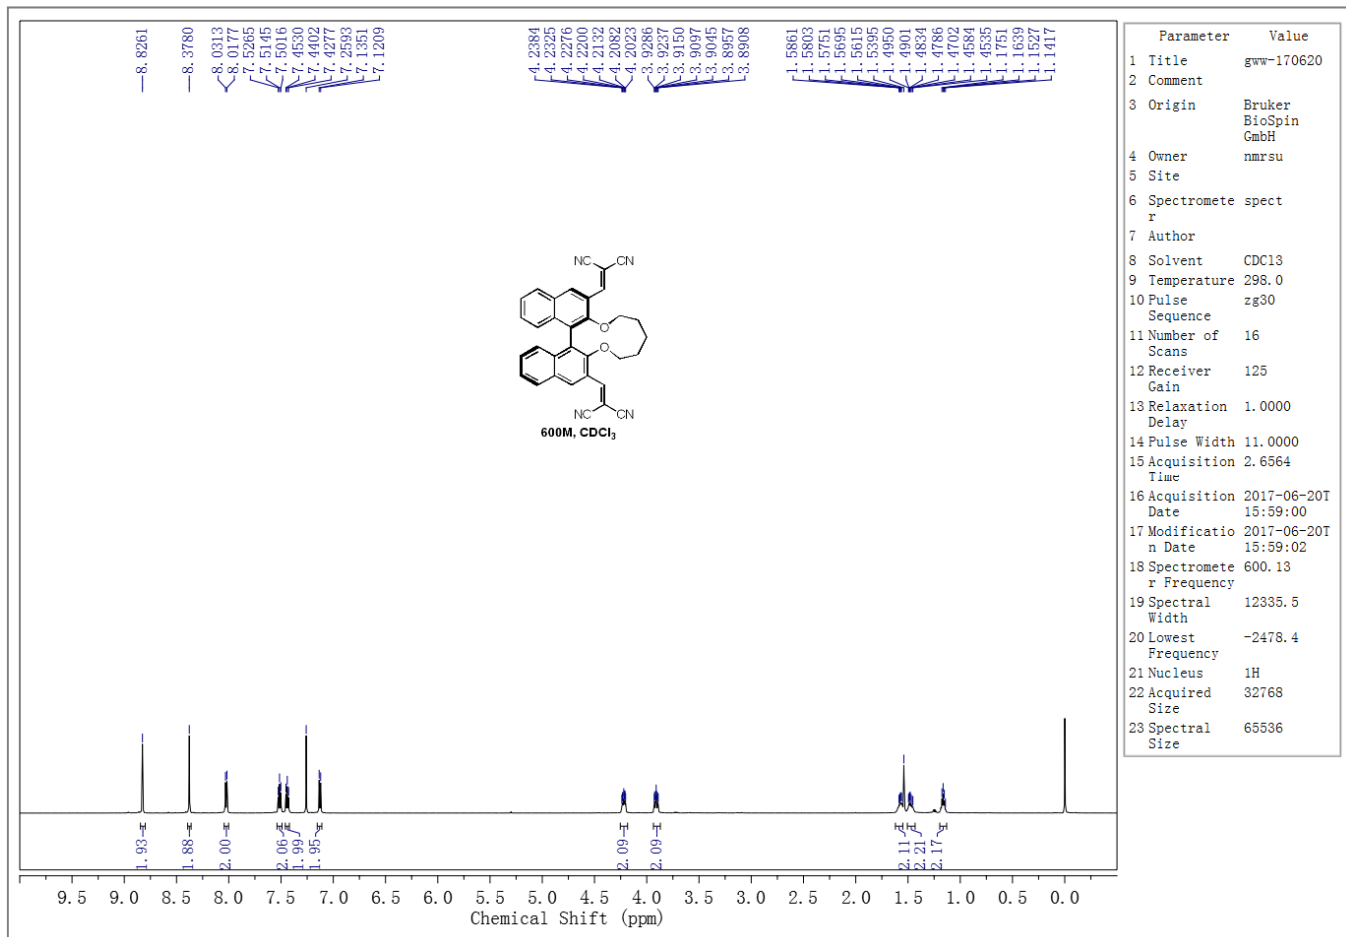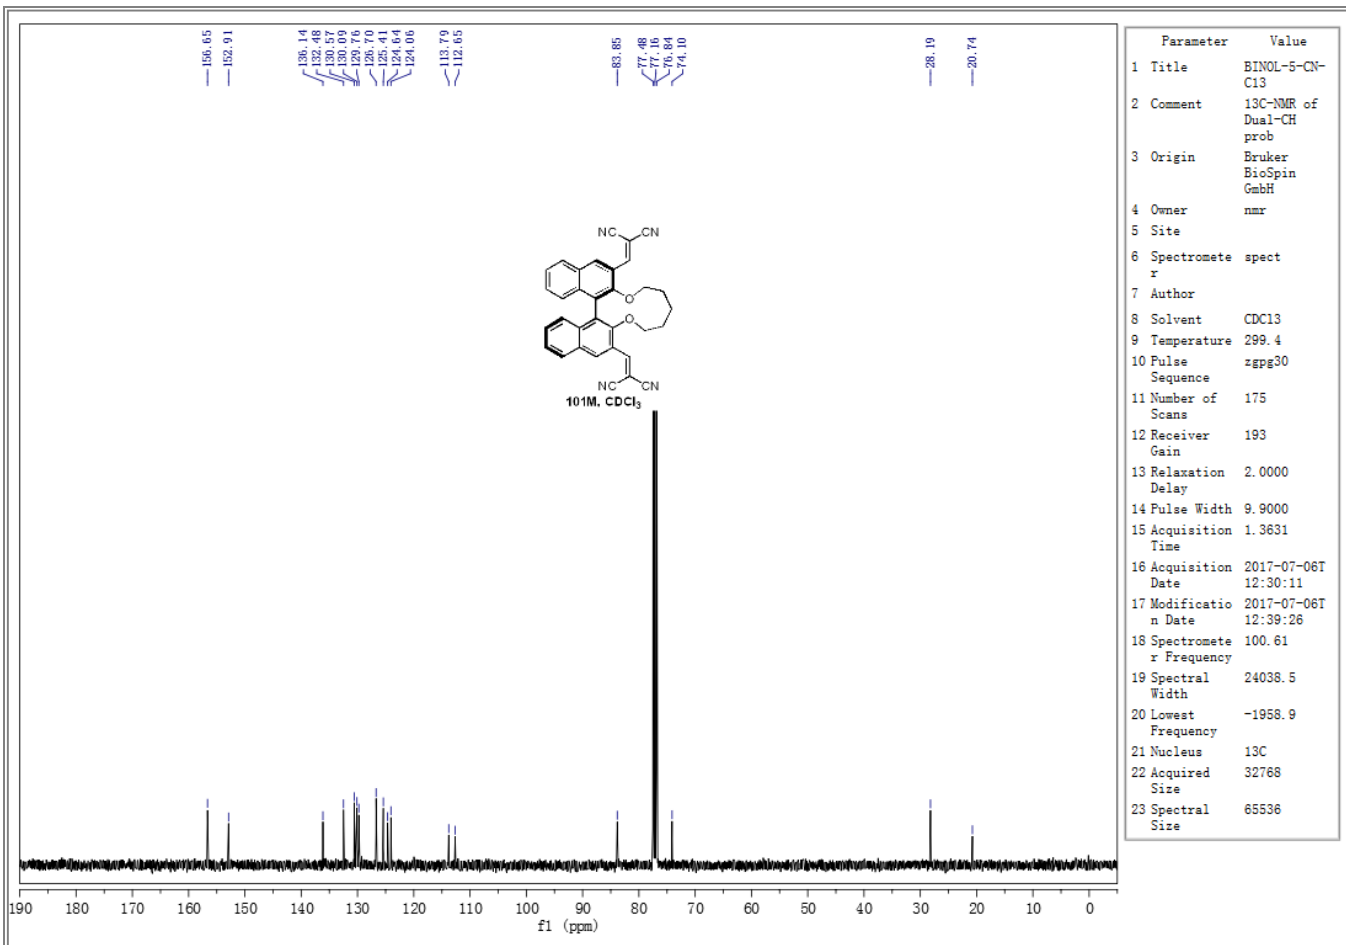

[Compounds chart](#)   [Data](#)   [X-ray](#)

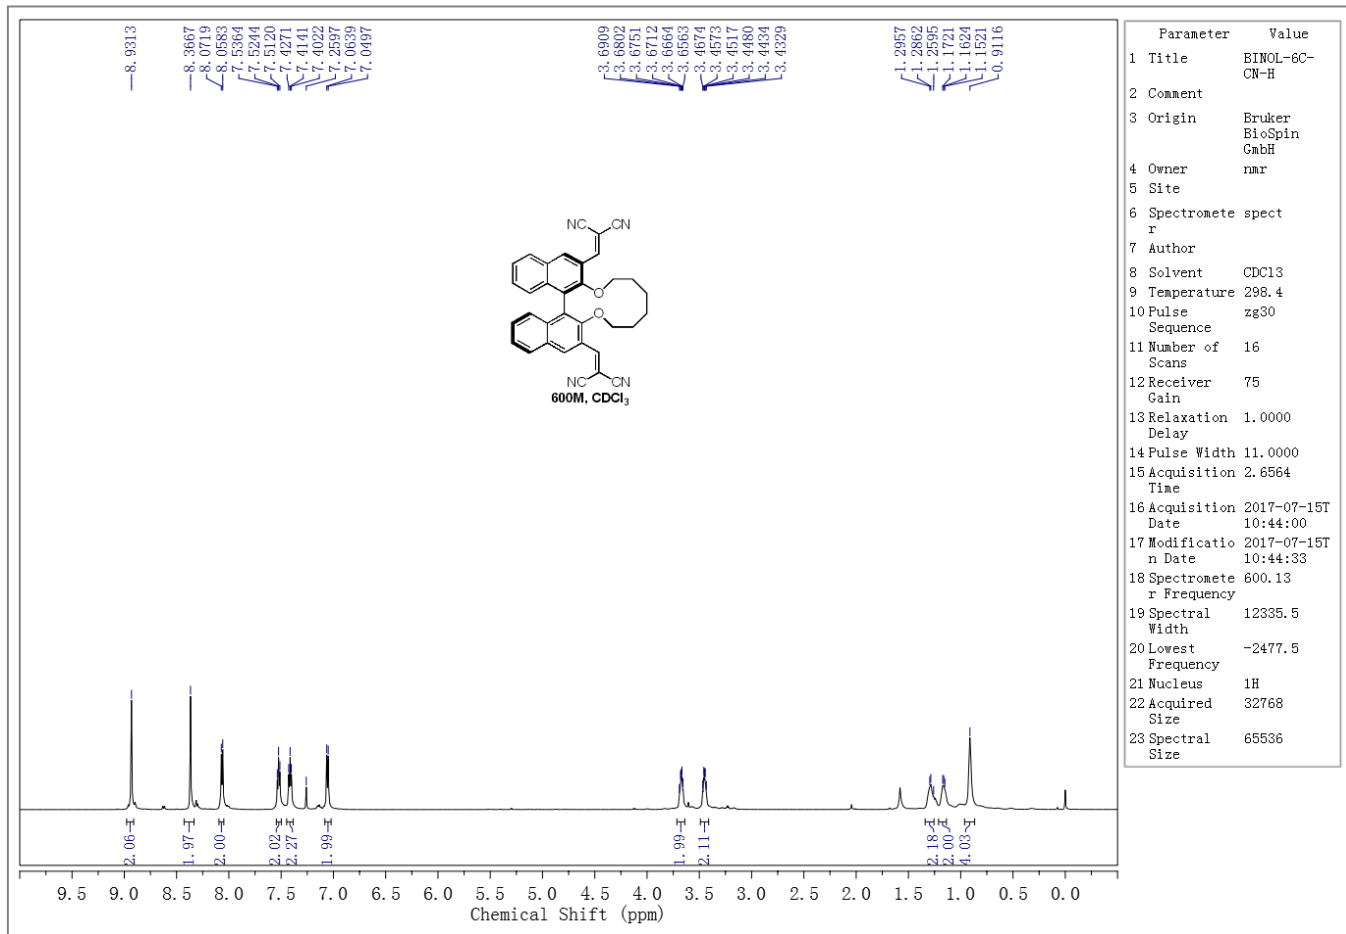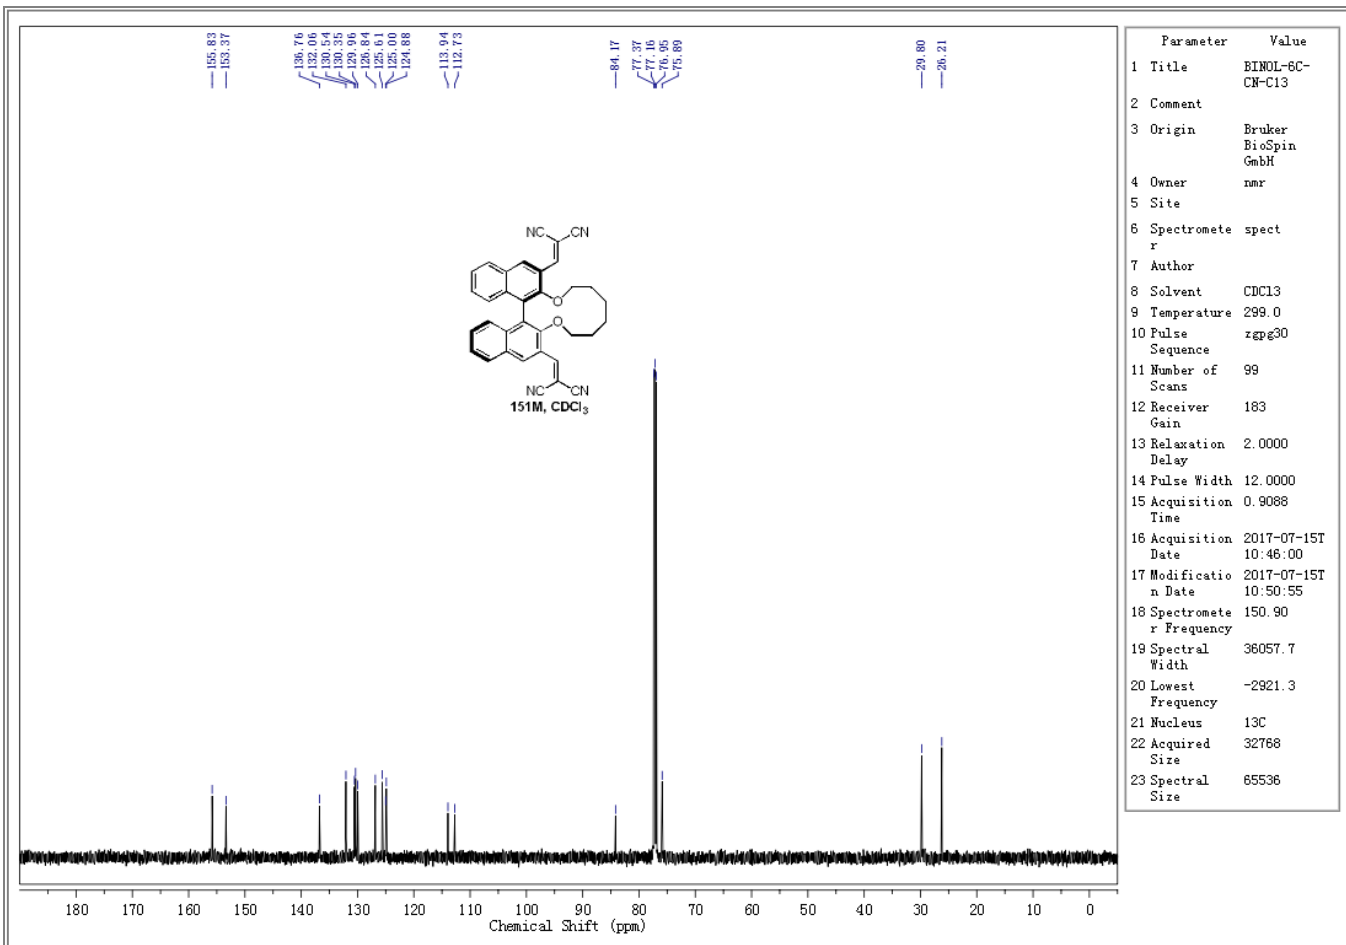

[Compounds chart](#)

[Data](#)

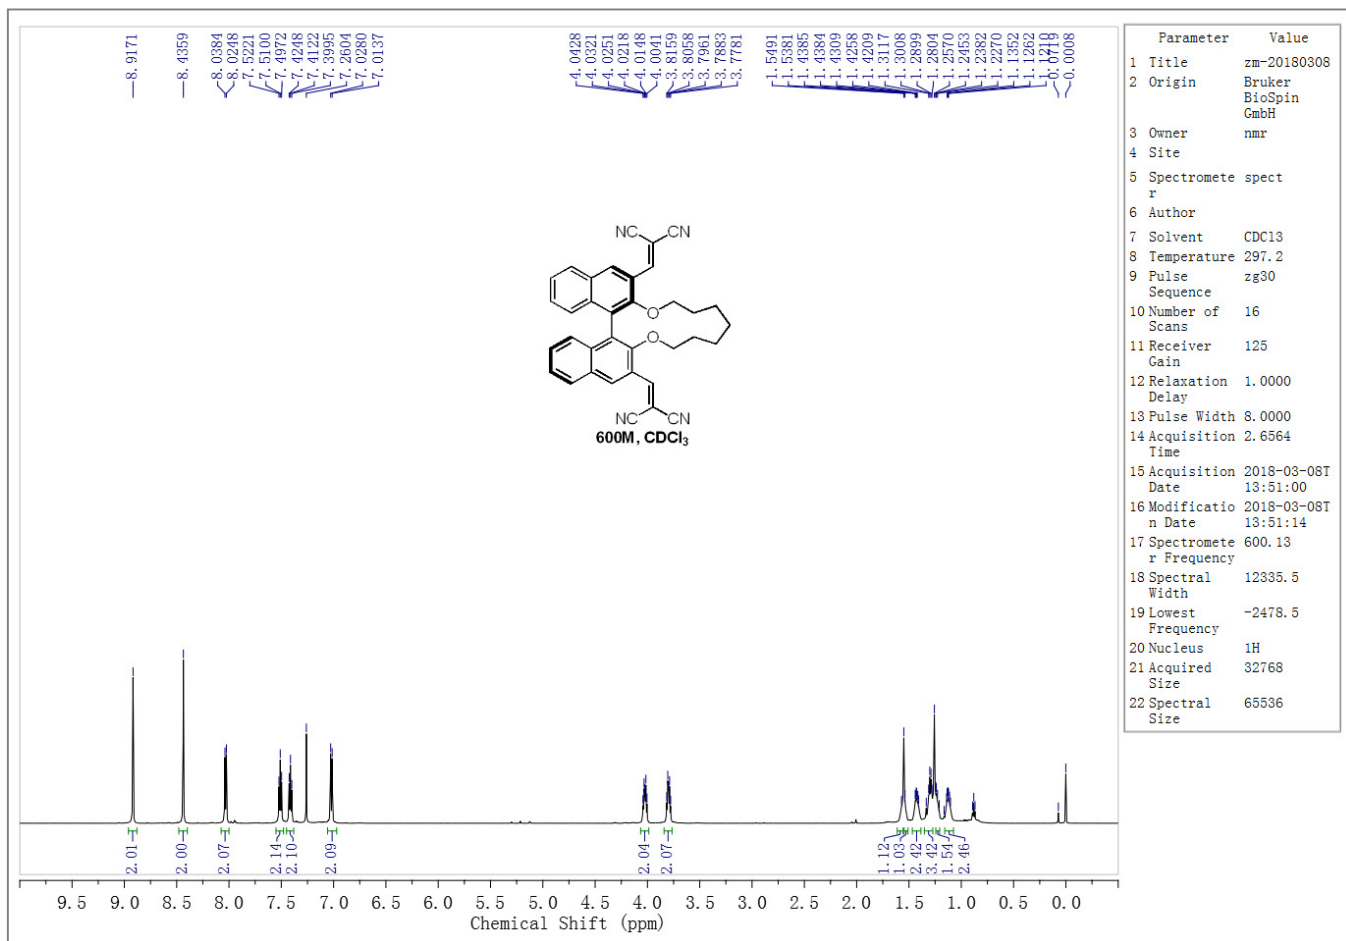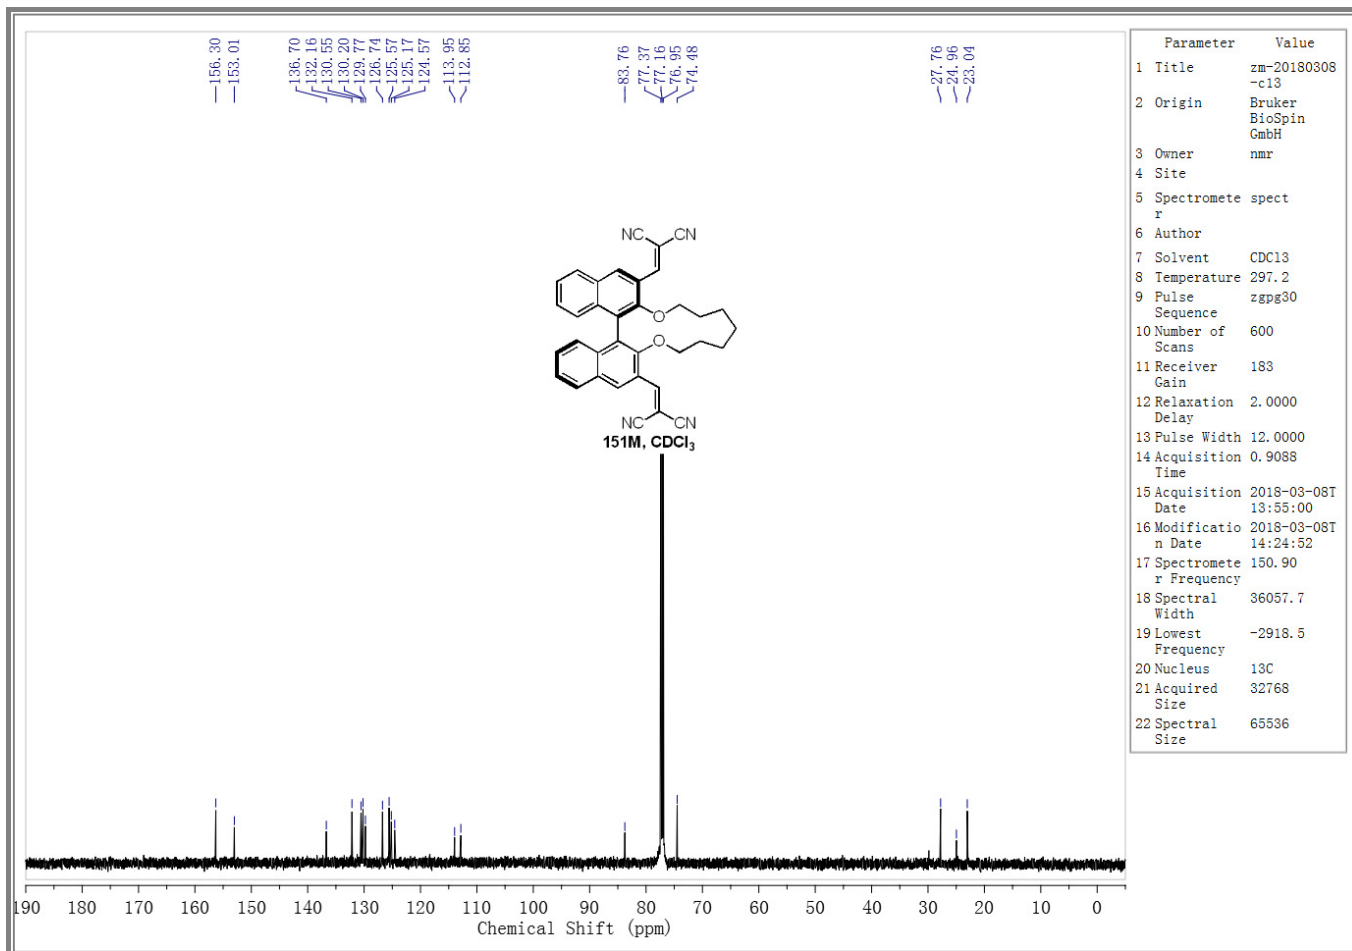

[Compounds chart](#)   [Data](#)   [X-ray](#)

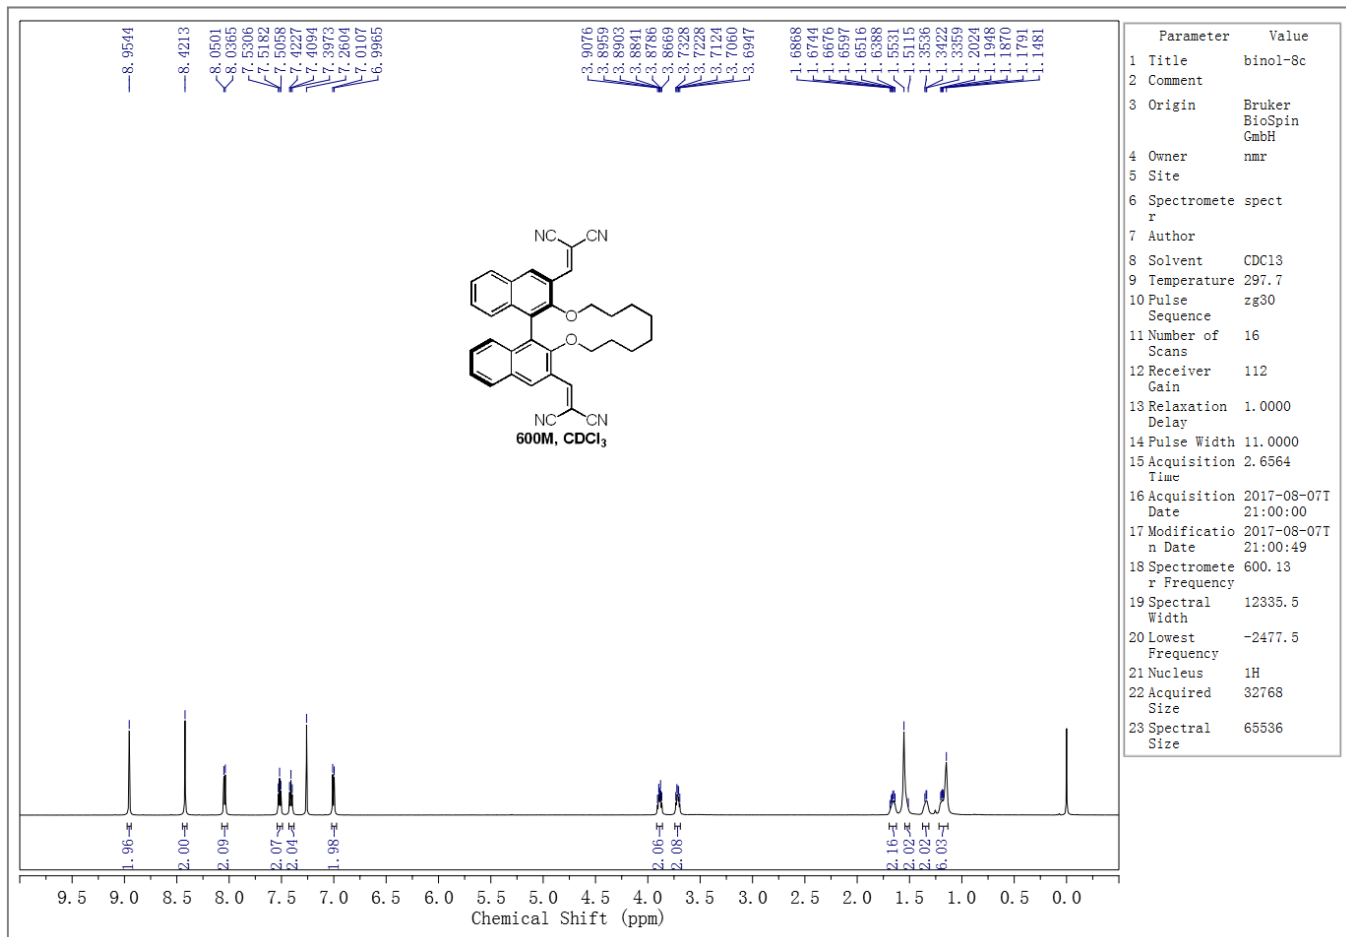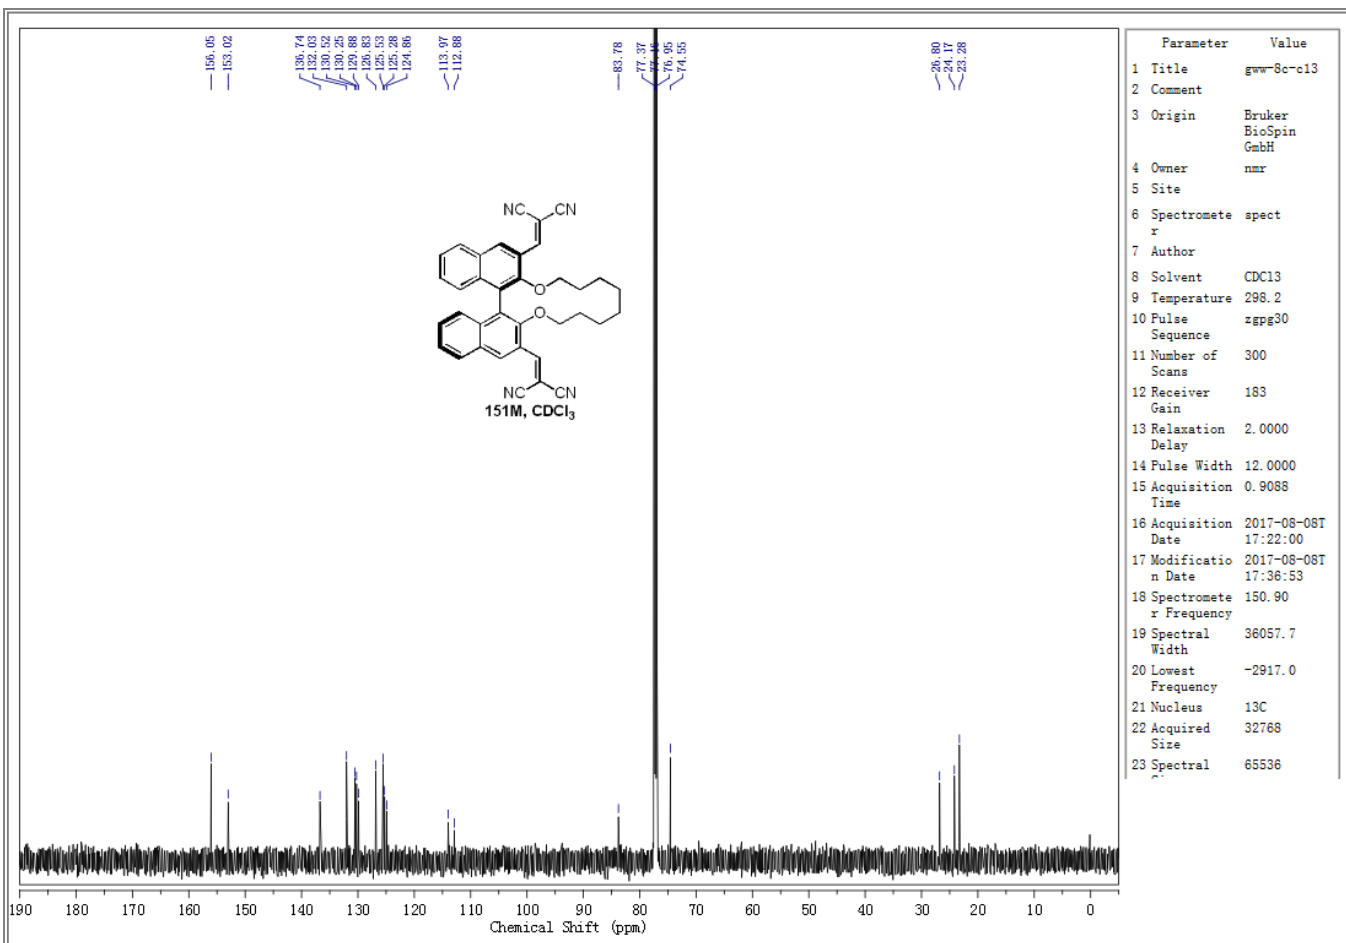

[Compounds chart](#)

[Data](#)

[X-ray](#)



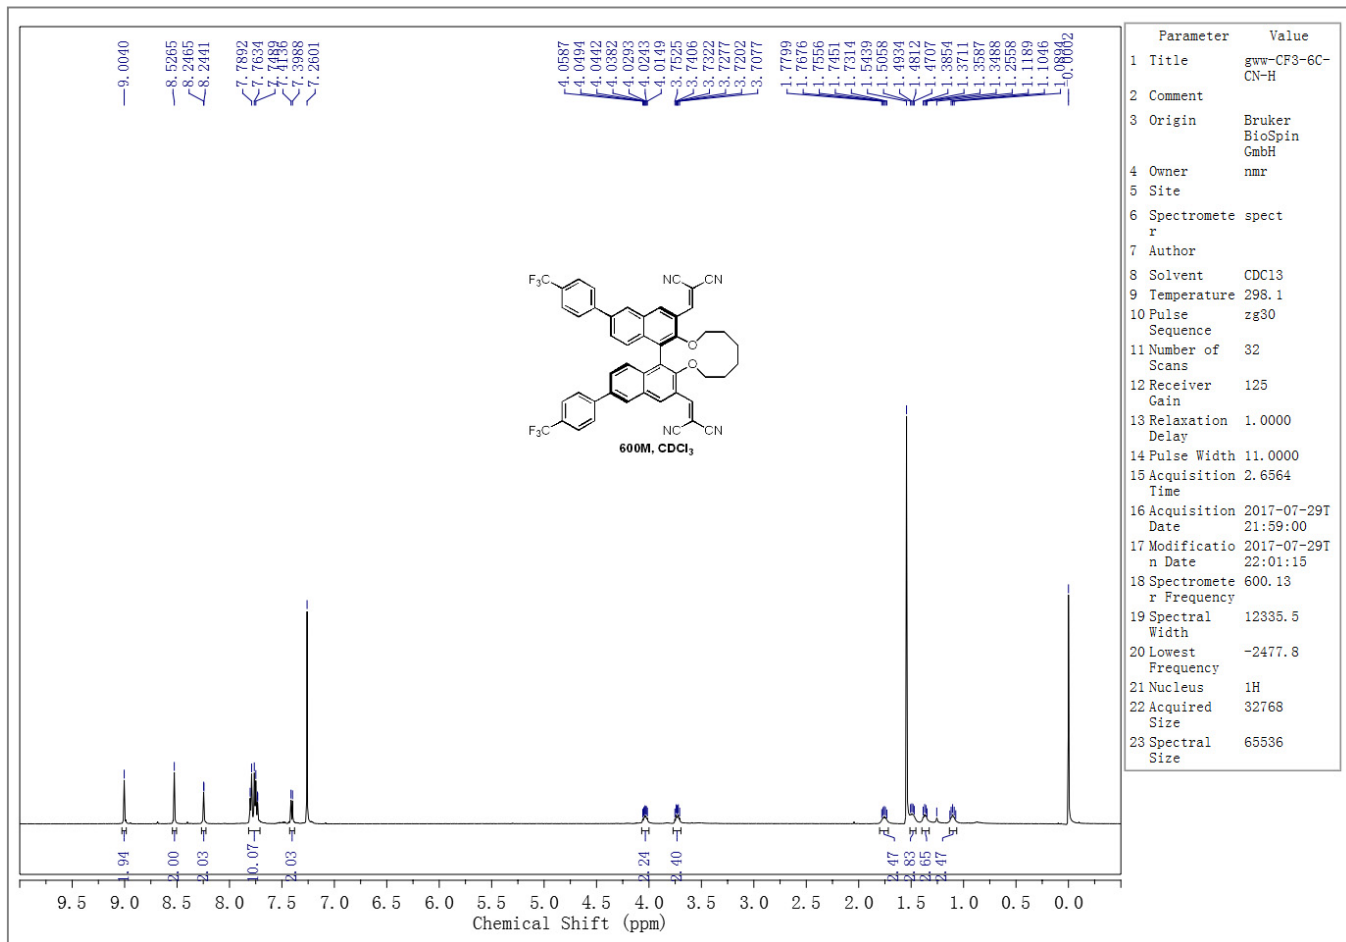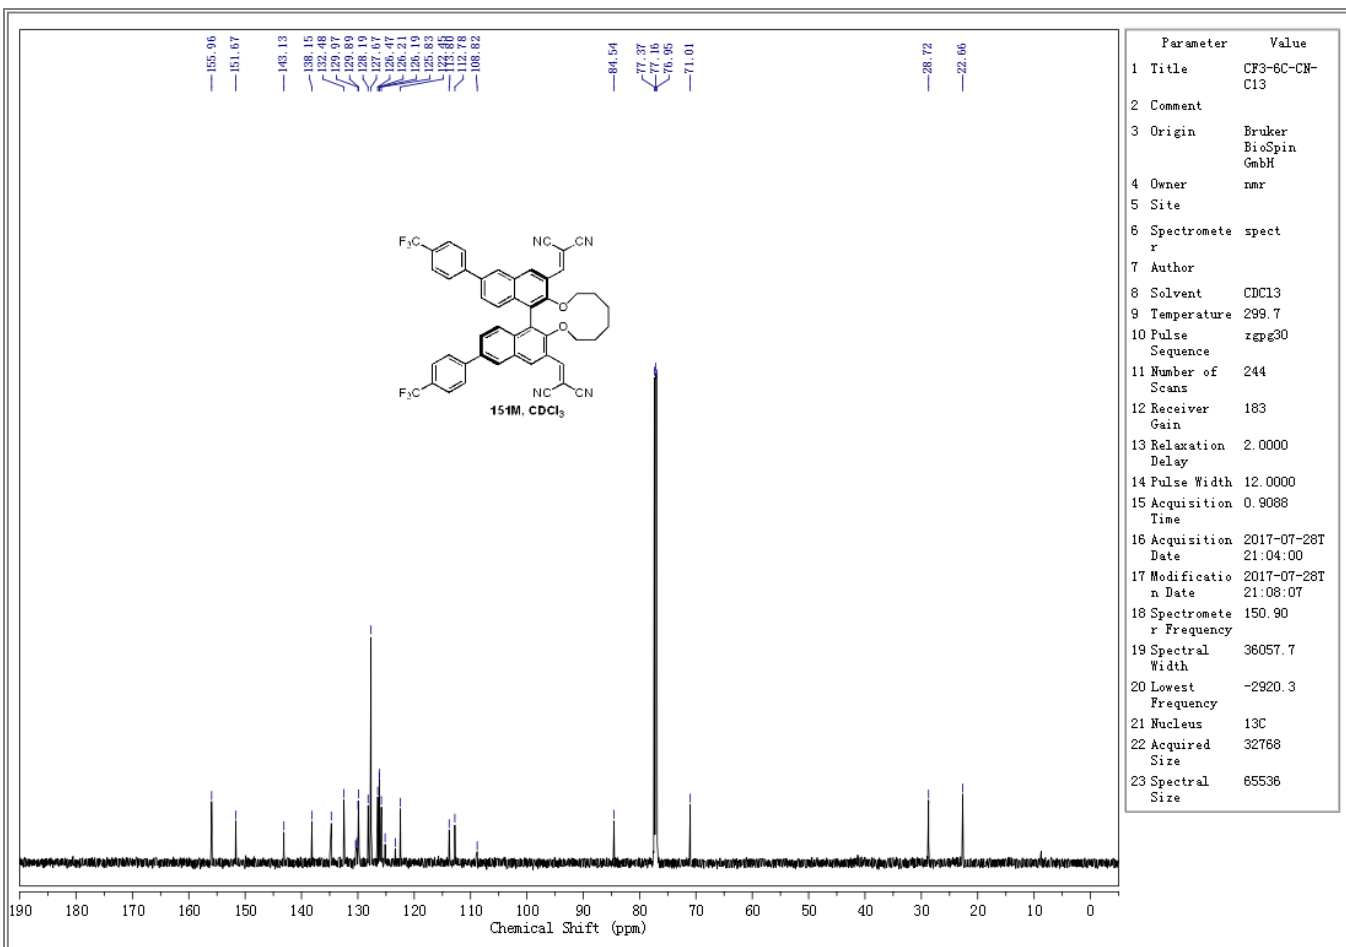

[Compounds chart](#)    [Data](#)    [X-ray](#)

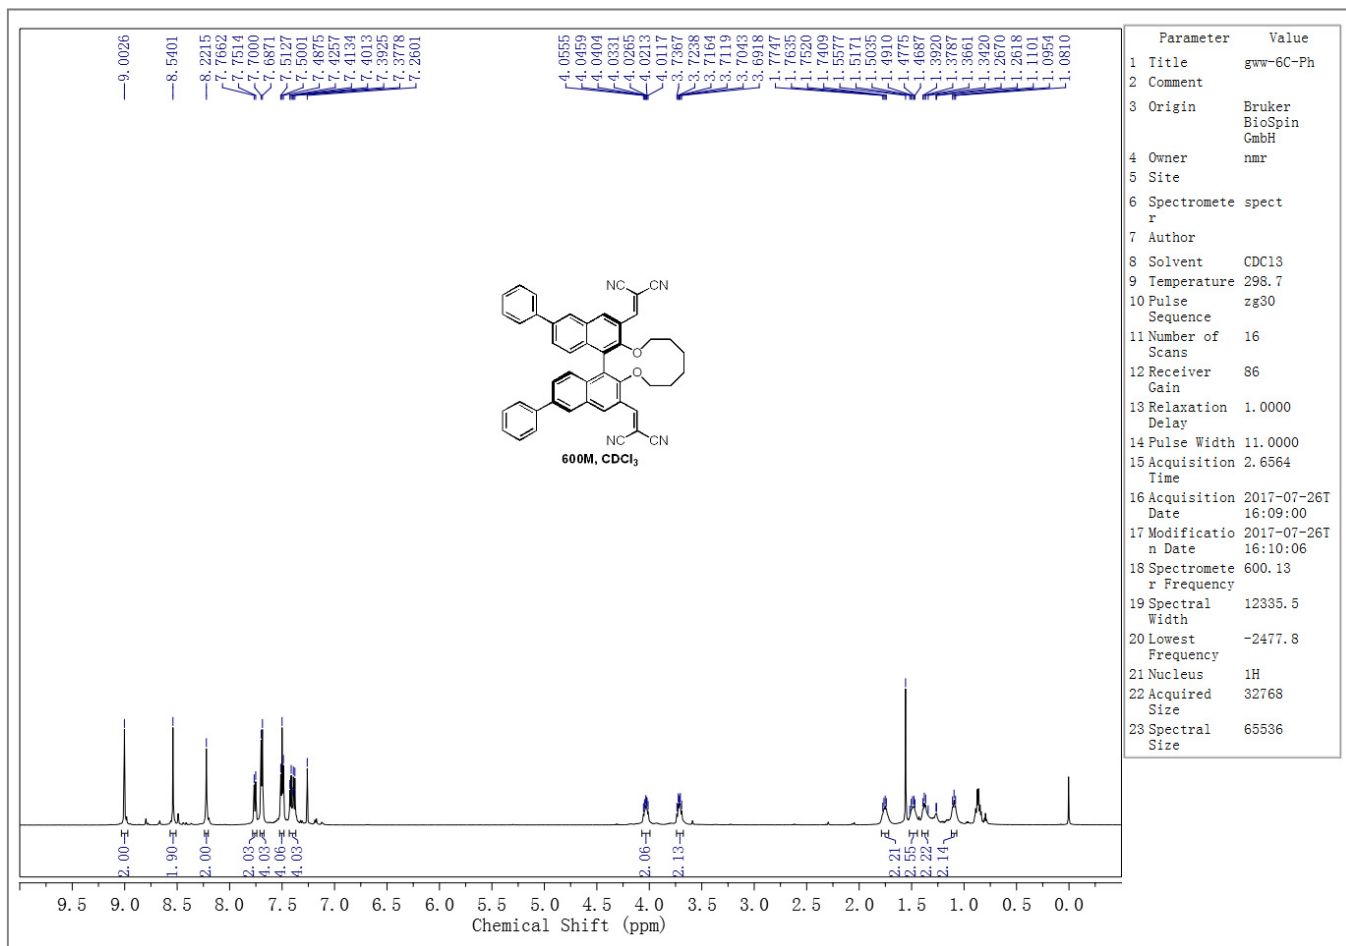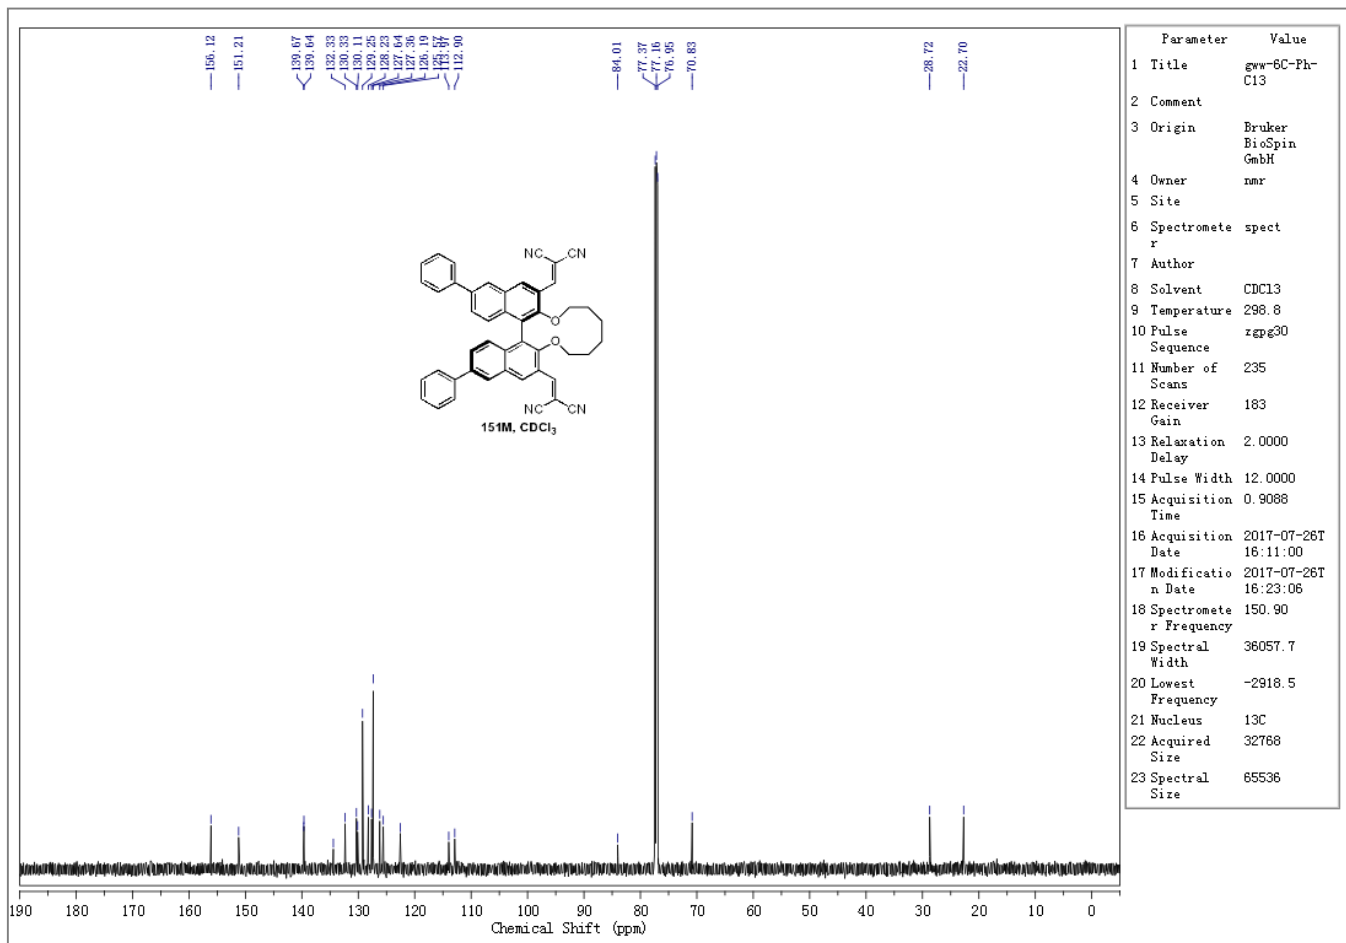

[Compounds chart](#)   [Data](#)

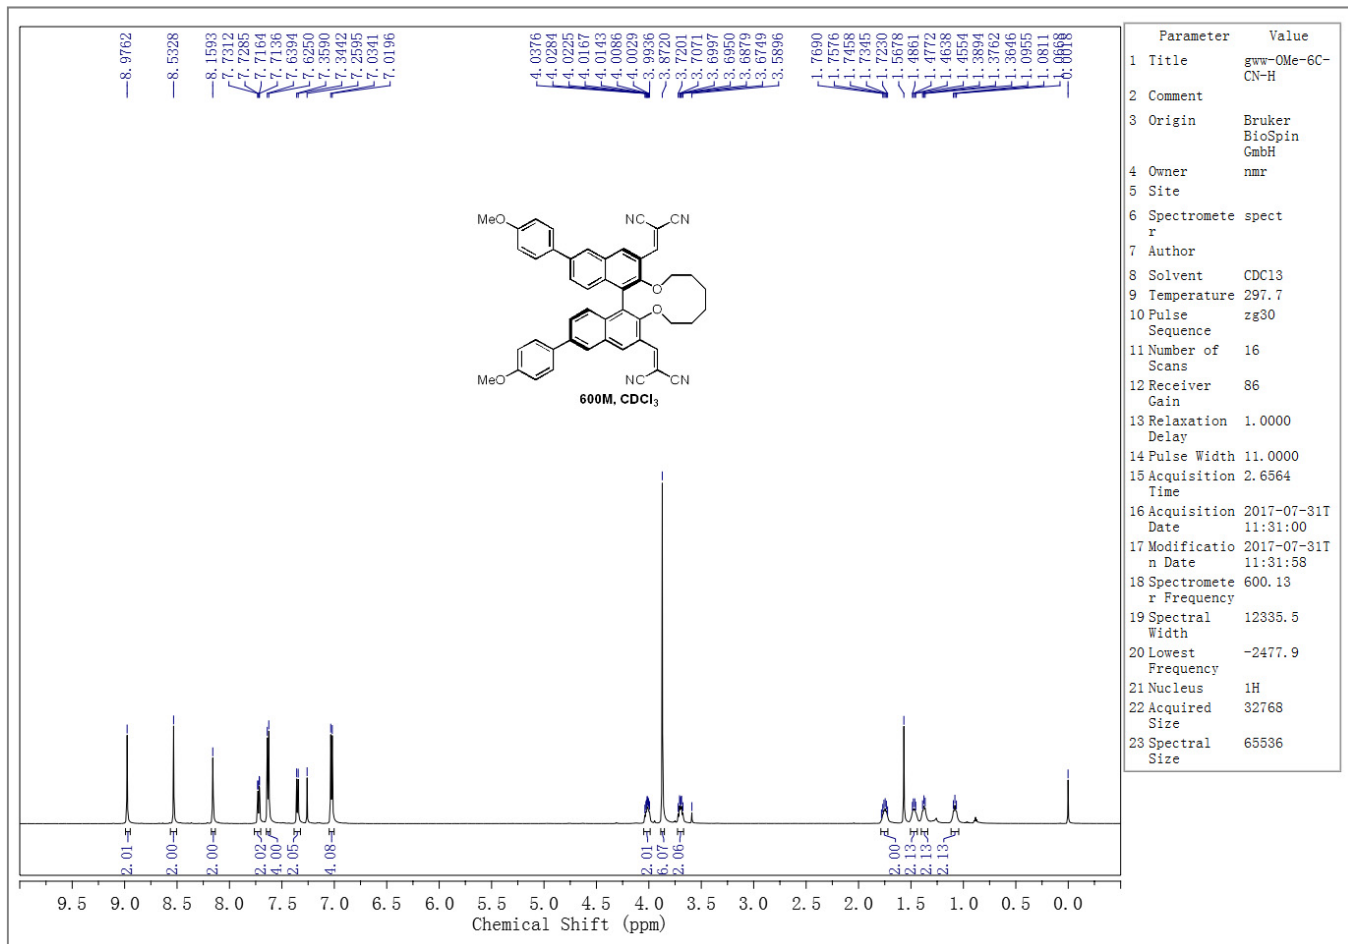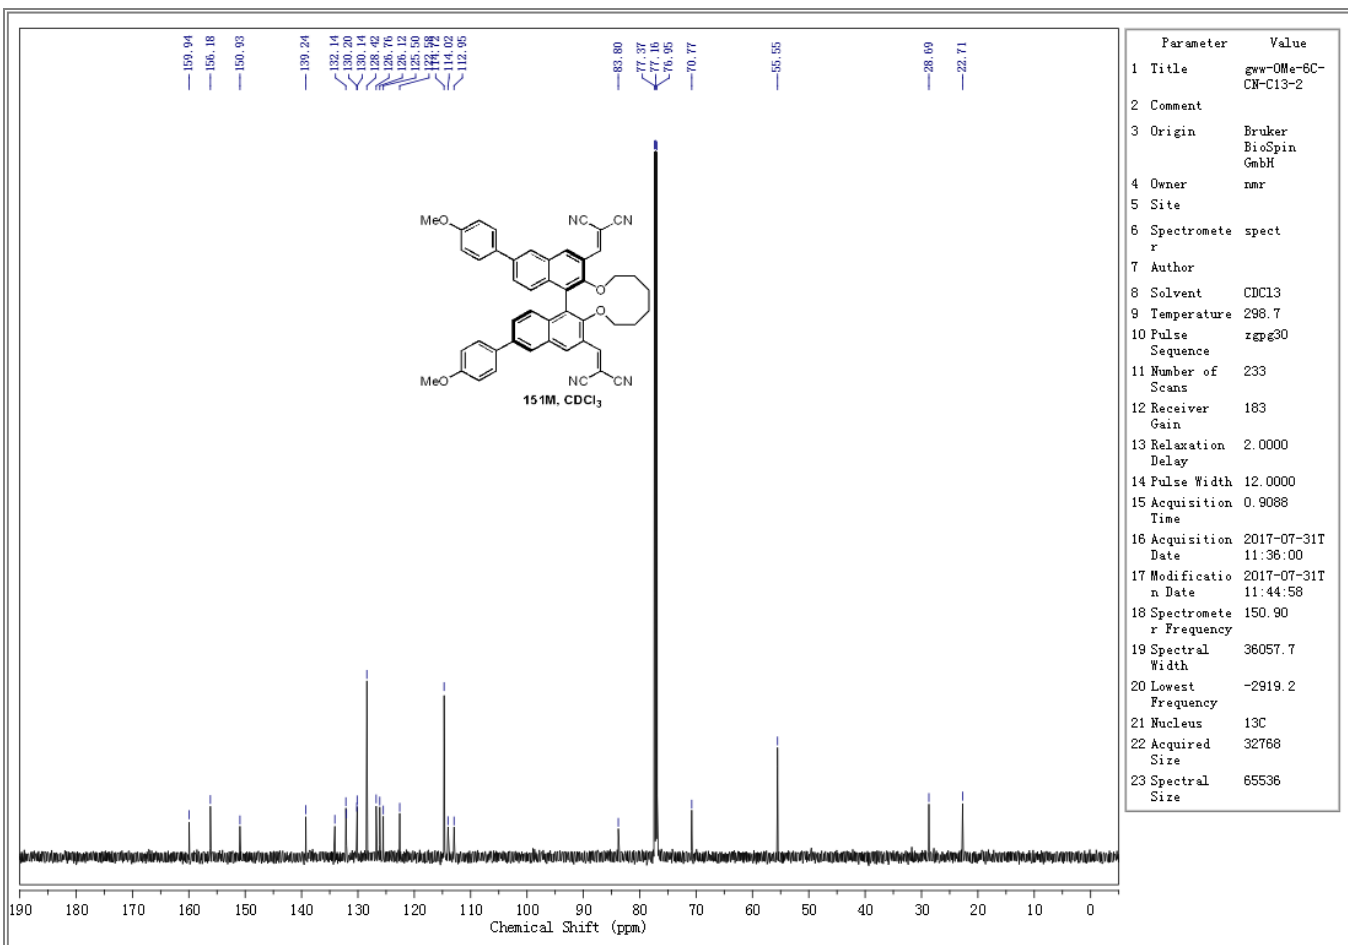

[Compounds chart](#)

[Data](#)

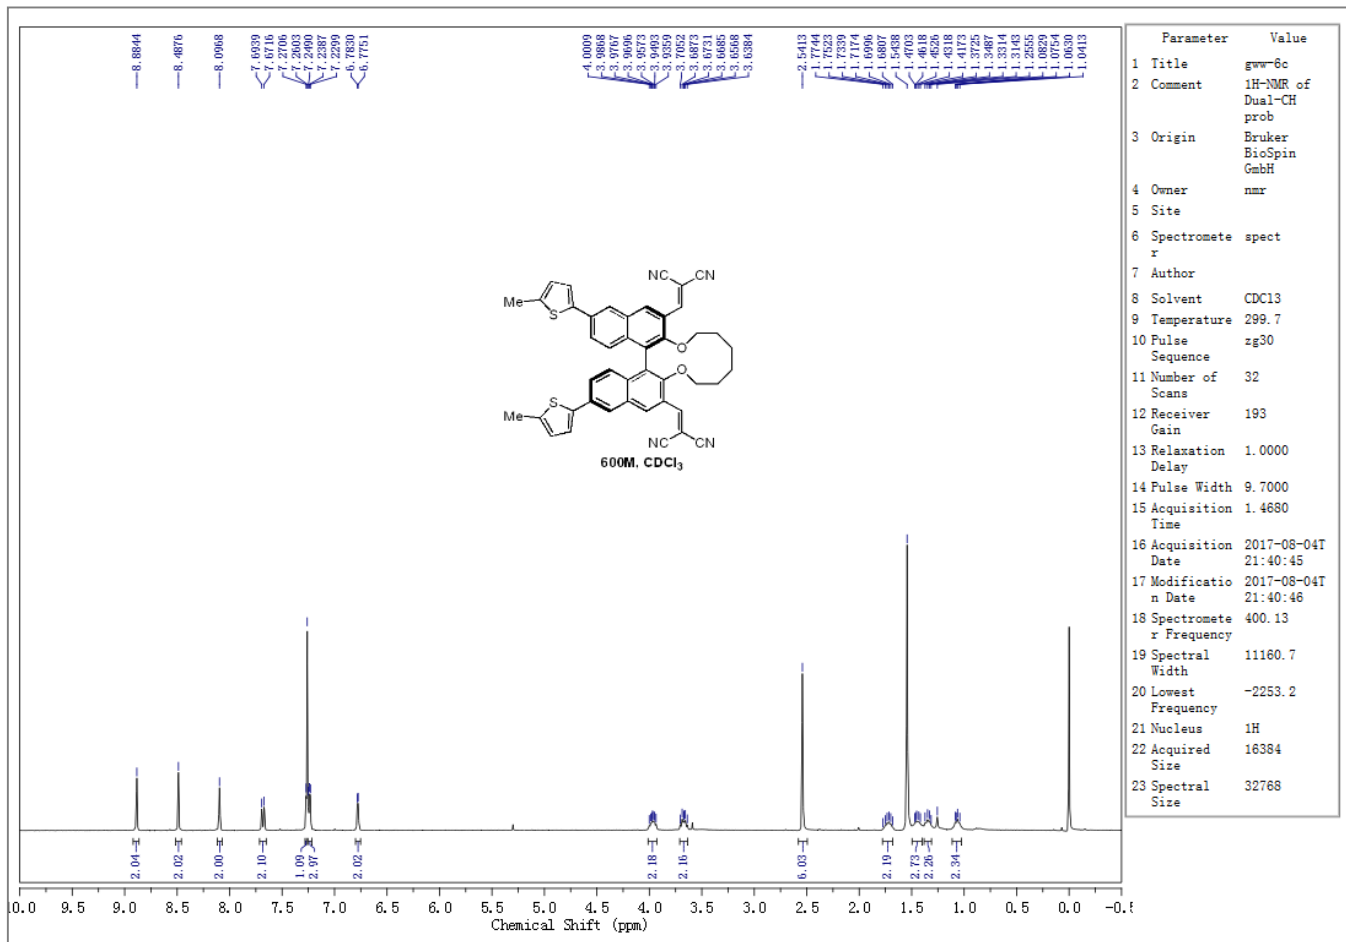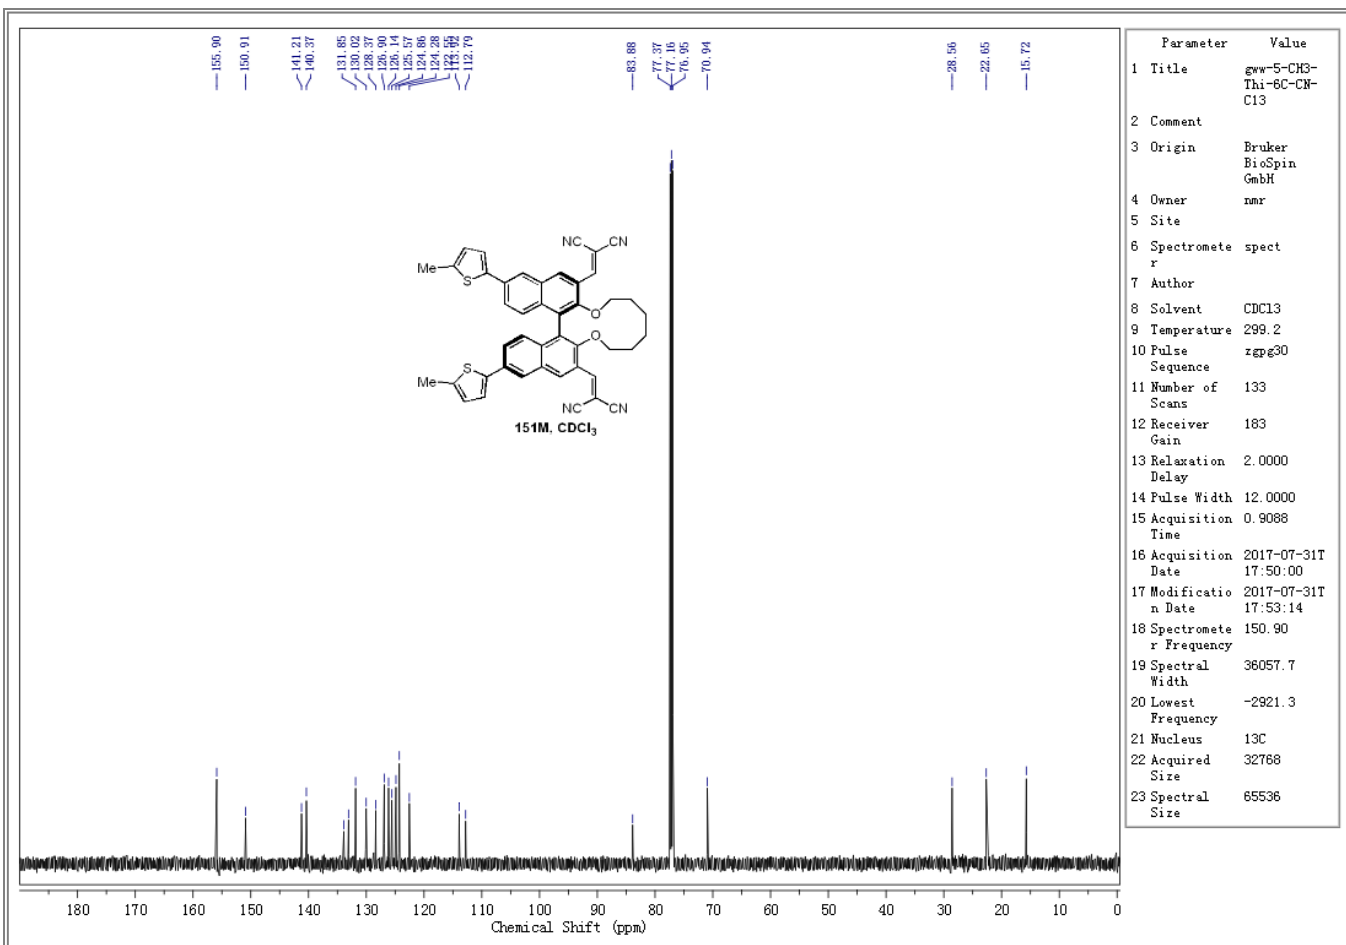

[Compounds chart](#) [Data](#)

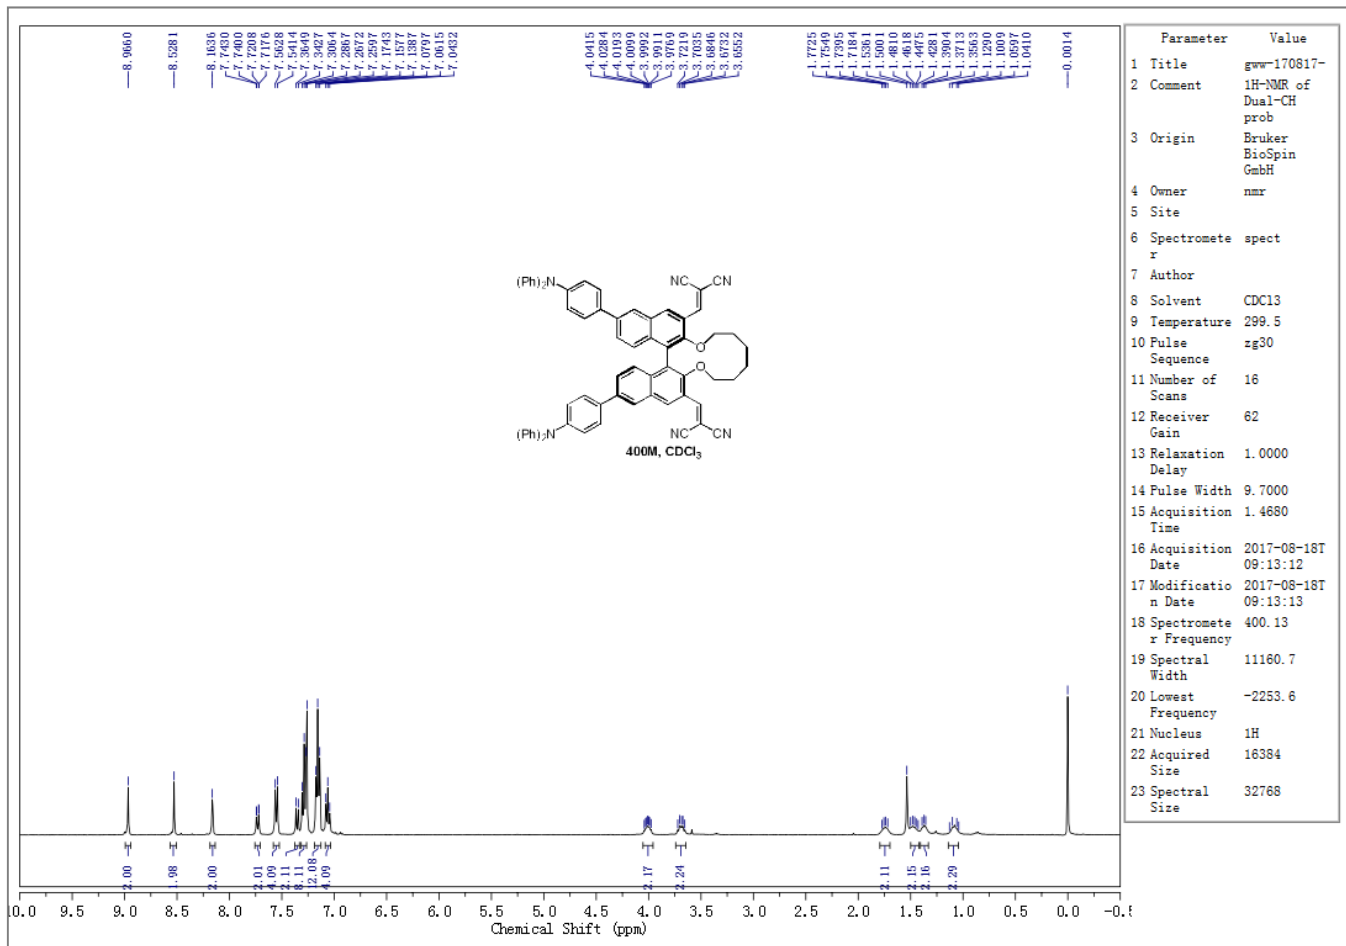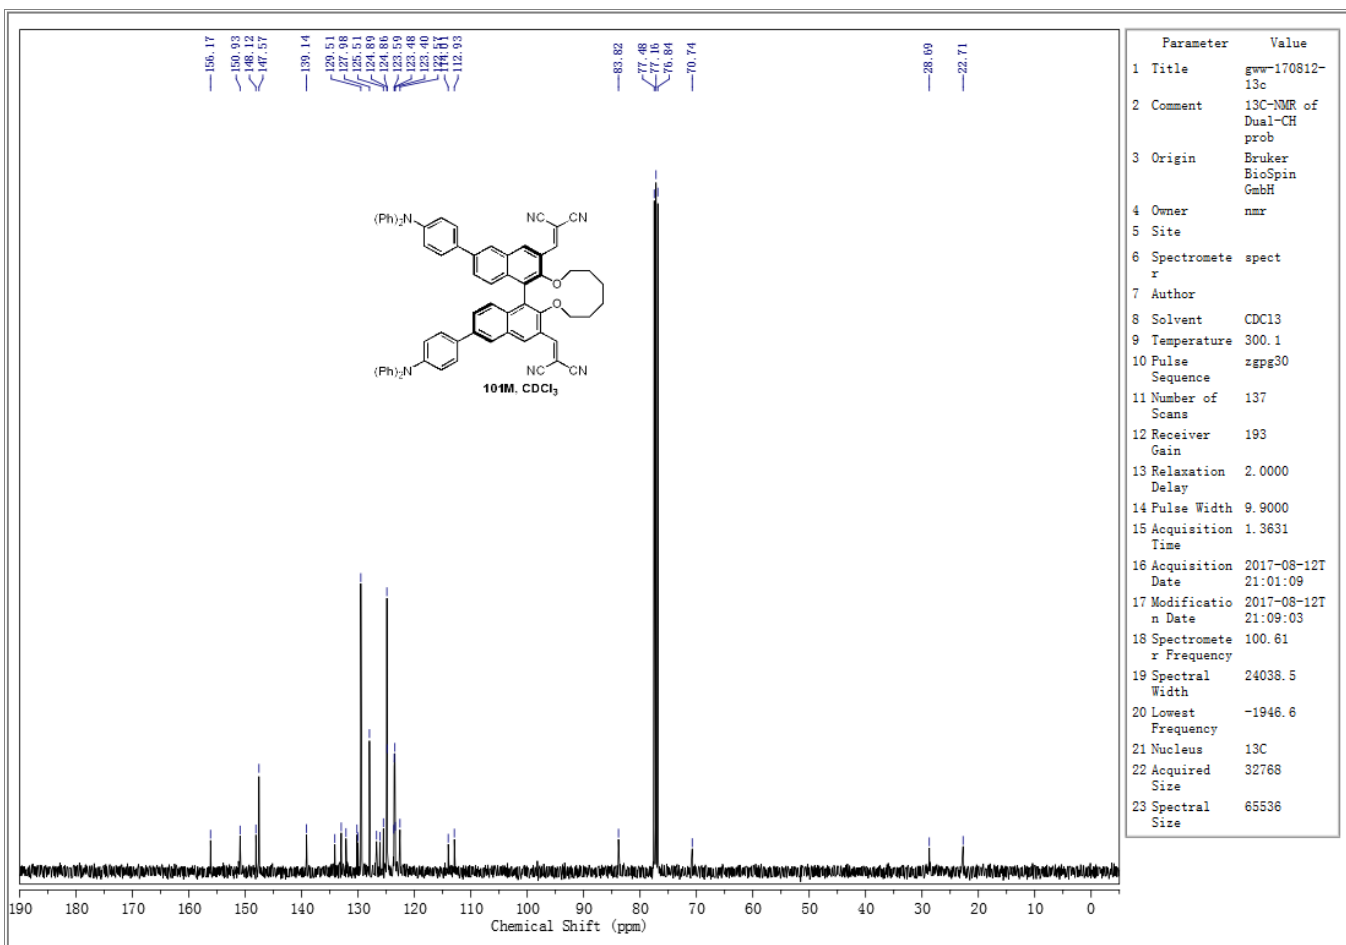

[Compounds chart](#)

[Data](#)

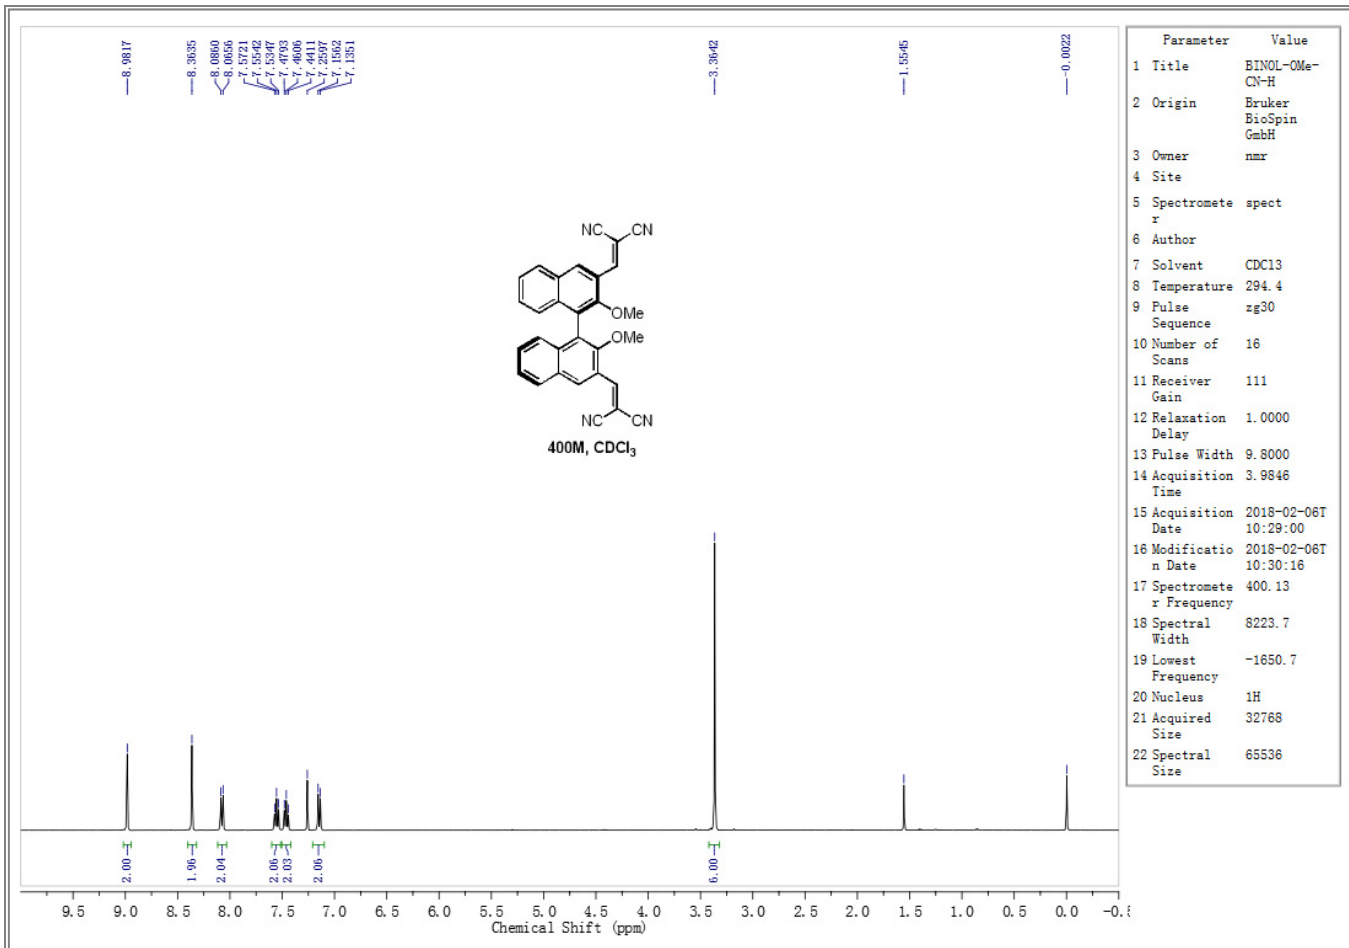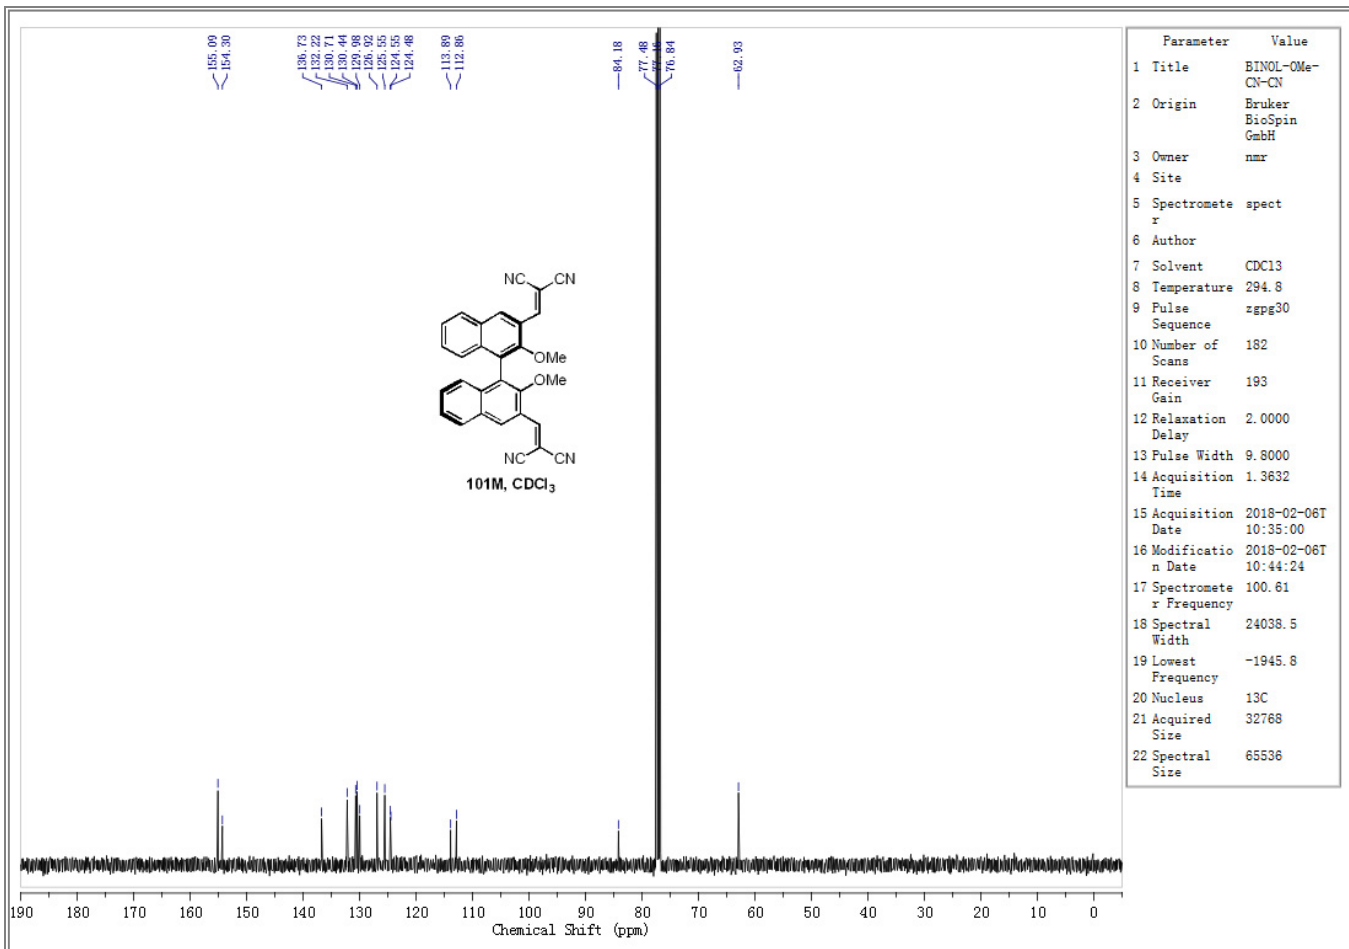

[Compounds chart](#)   [Data](#)

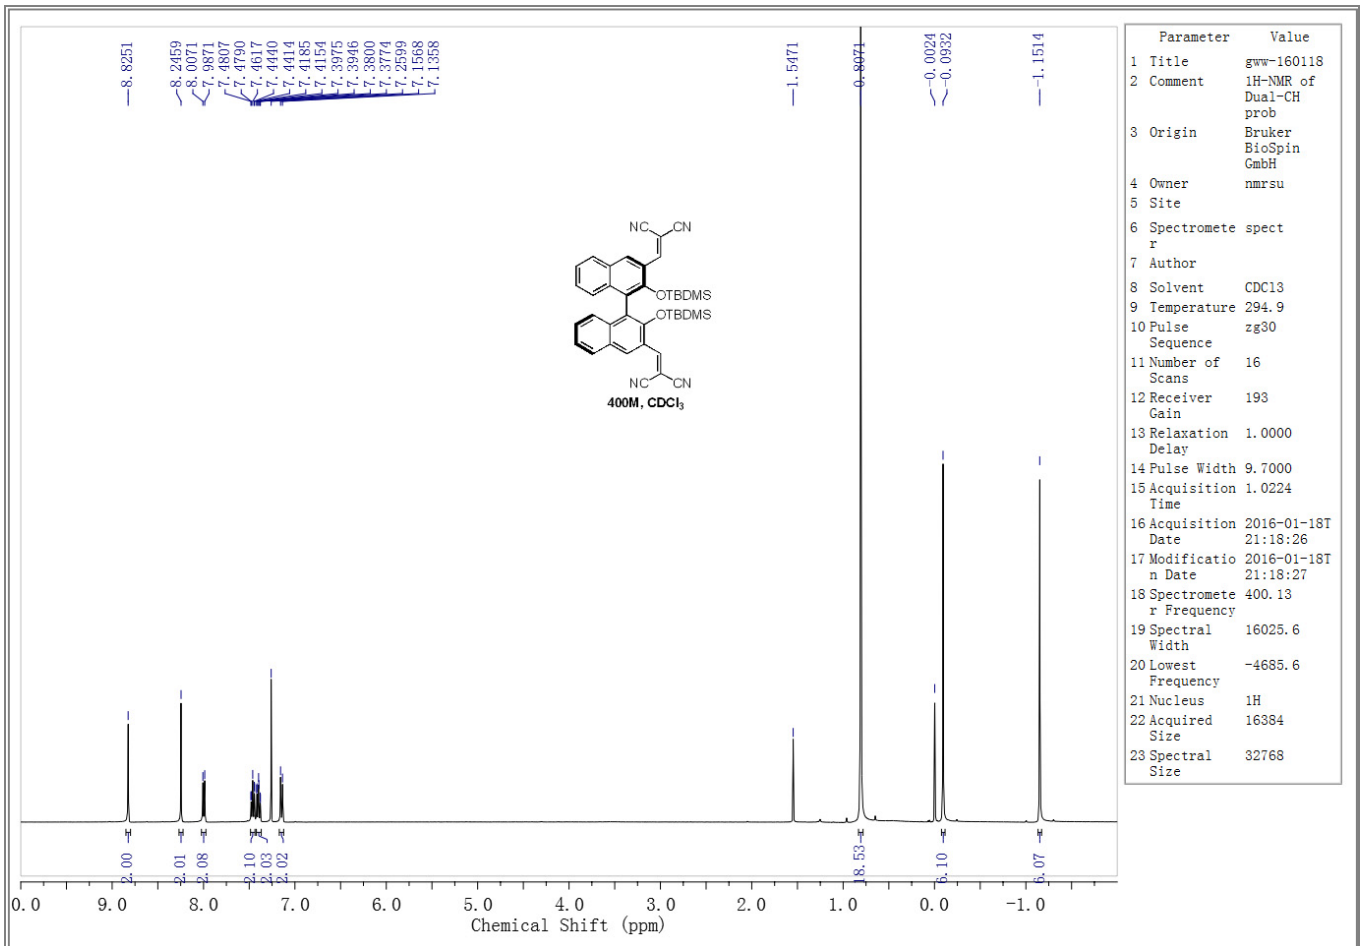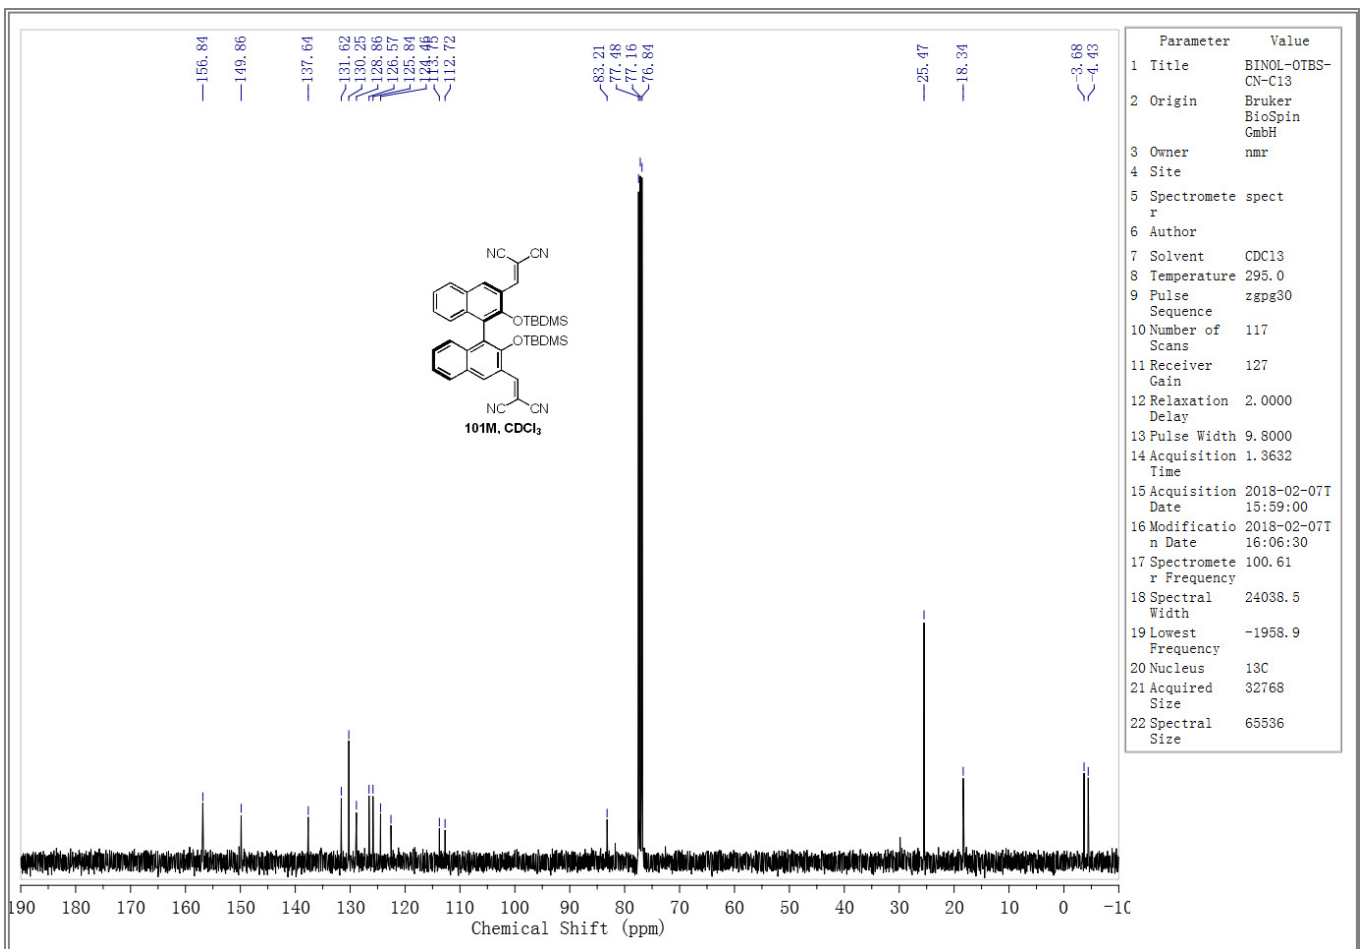

[Compounds chart](#)   [Data](#)

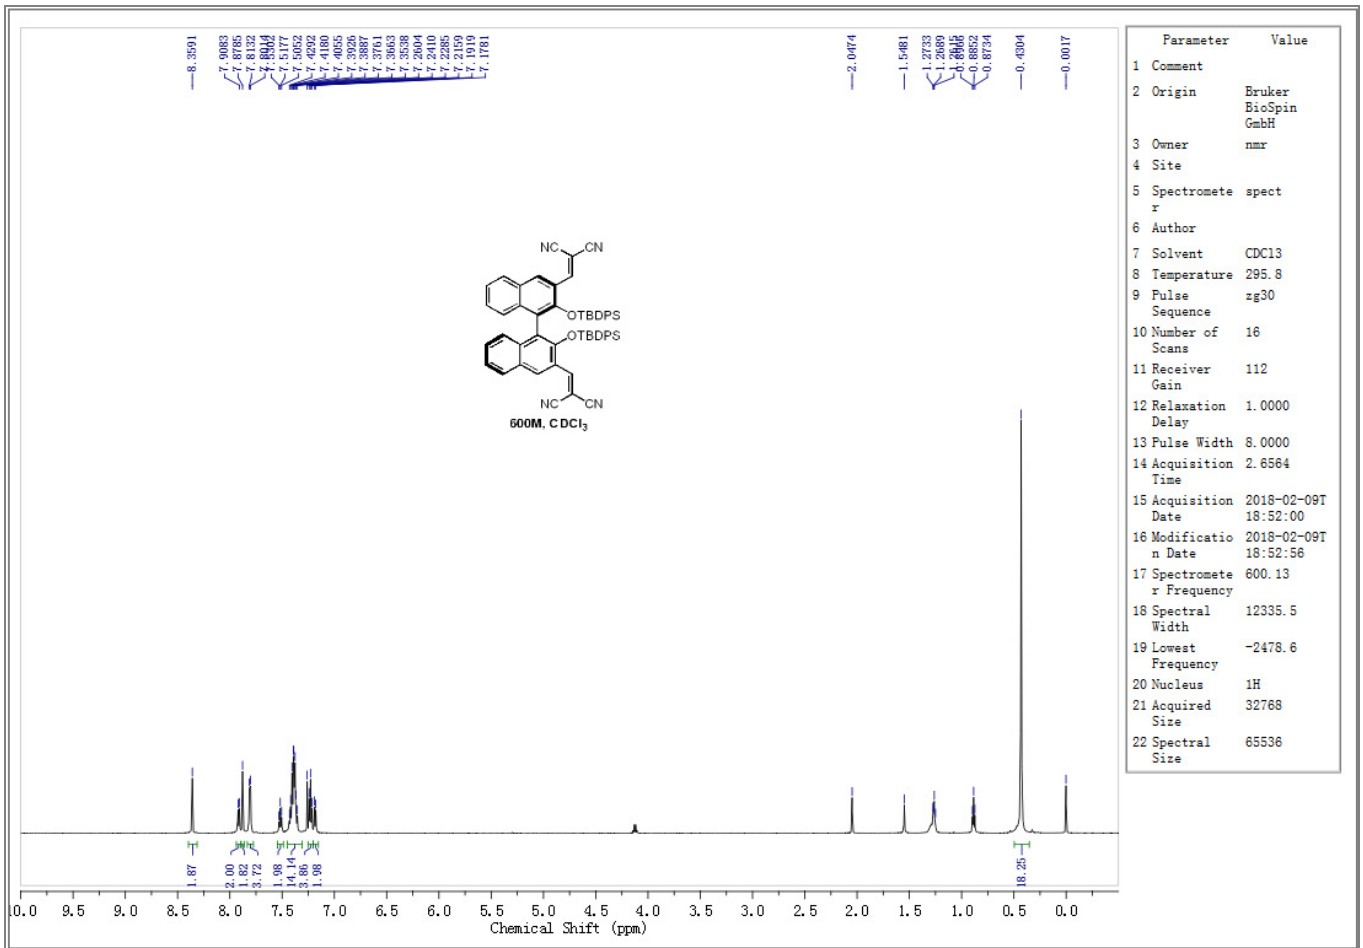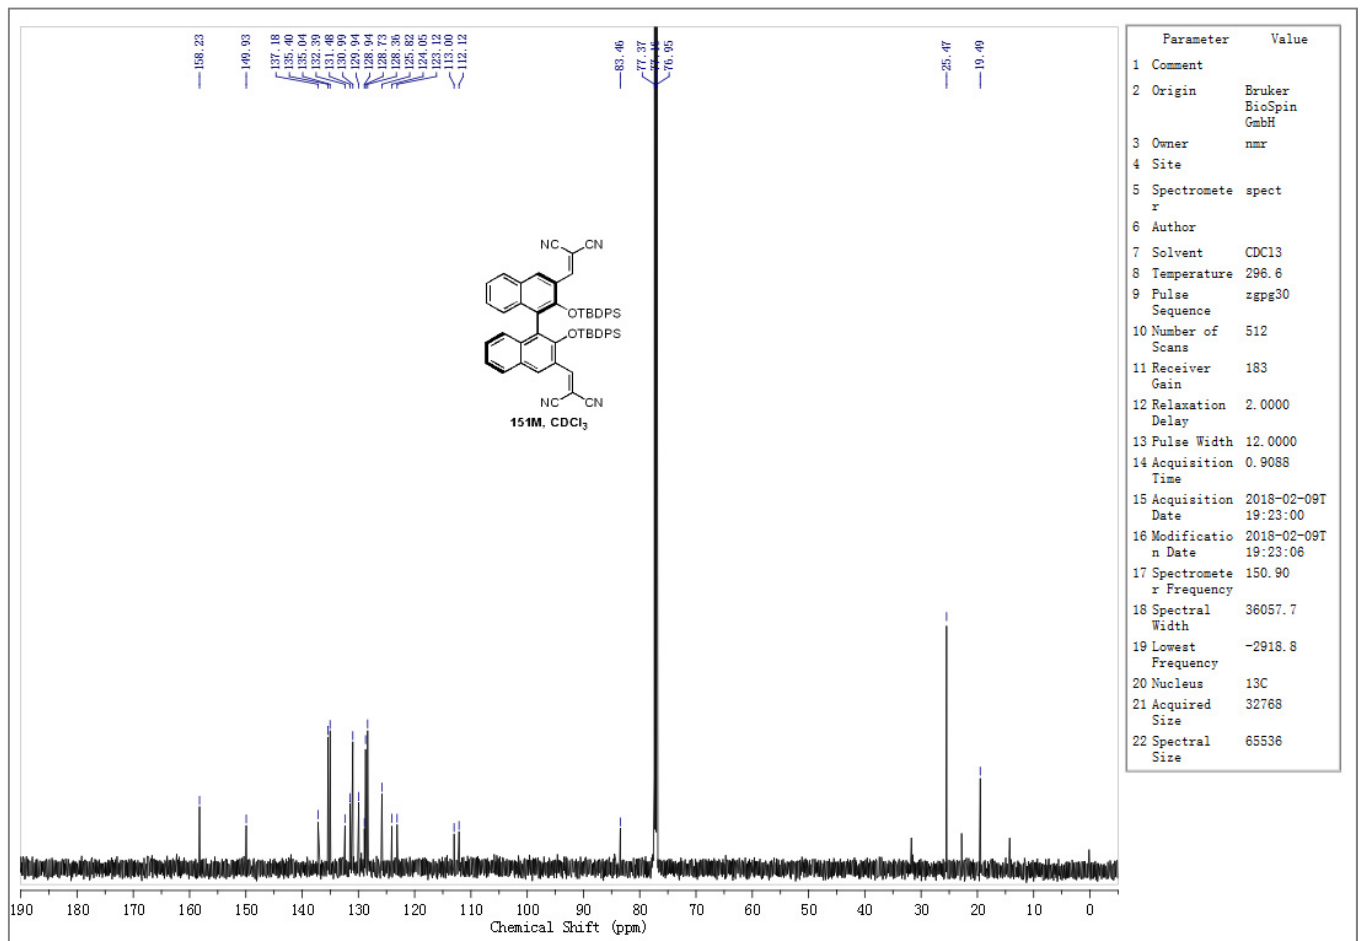

[Compounds chart](#)   [Data](#)
